# Supplementary material for: Expanding the biotechnology potential of lactobacilli through comparative genomics of 213 strains and associated genera
Source: PubMed Central journal article supplement (PMC4667430; doi:10.1038/ncomms9322), 2015-09-29
Supplement: ncomms9322-s1.pdf [file ncomms9322-s1.pdf]

## Supplementary Figures

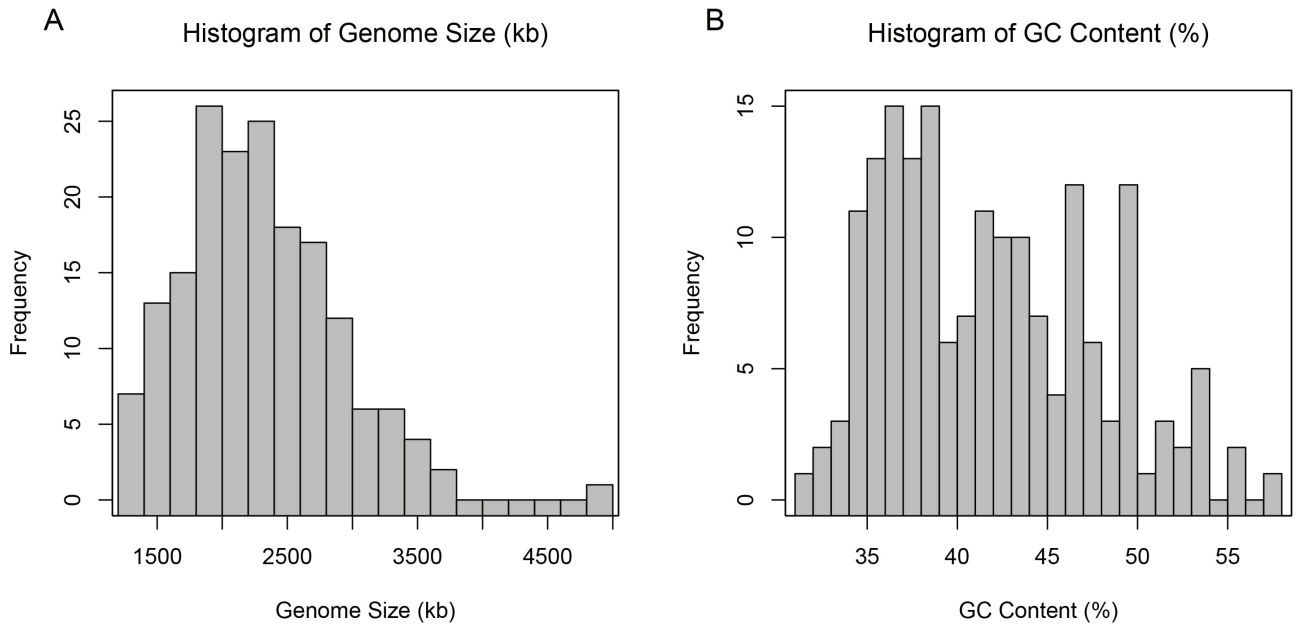

**Supp. Figure 1. Histograms of genome size distribution (A) and GC% (B) for 175 *Lactobacillus* genomes.**

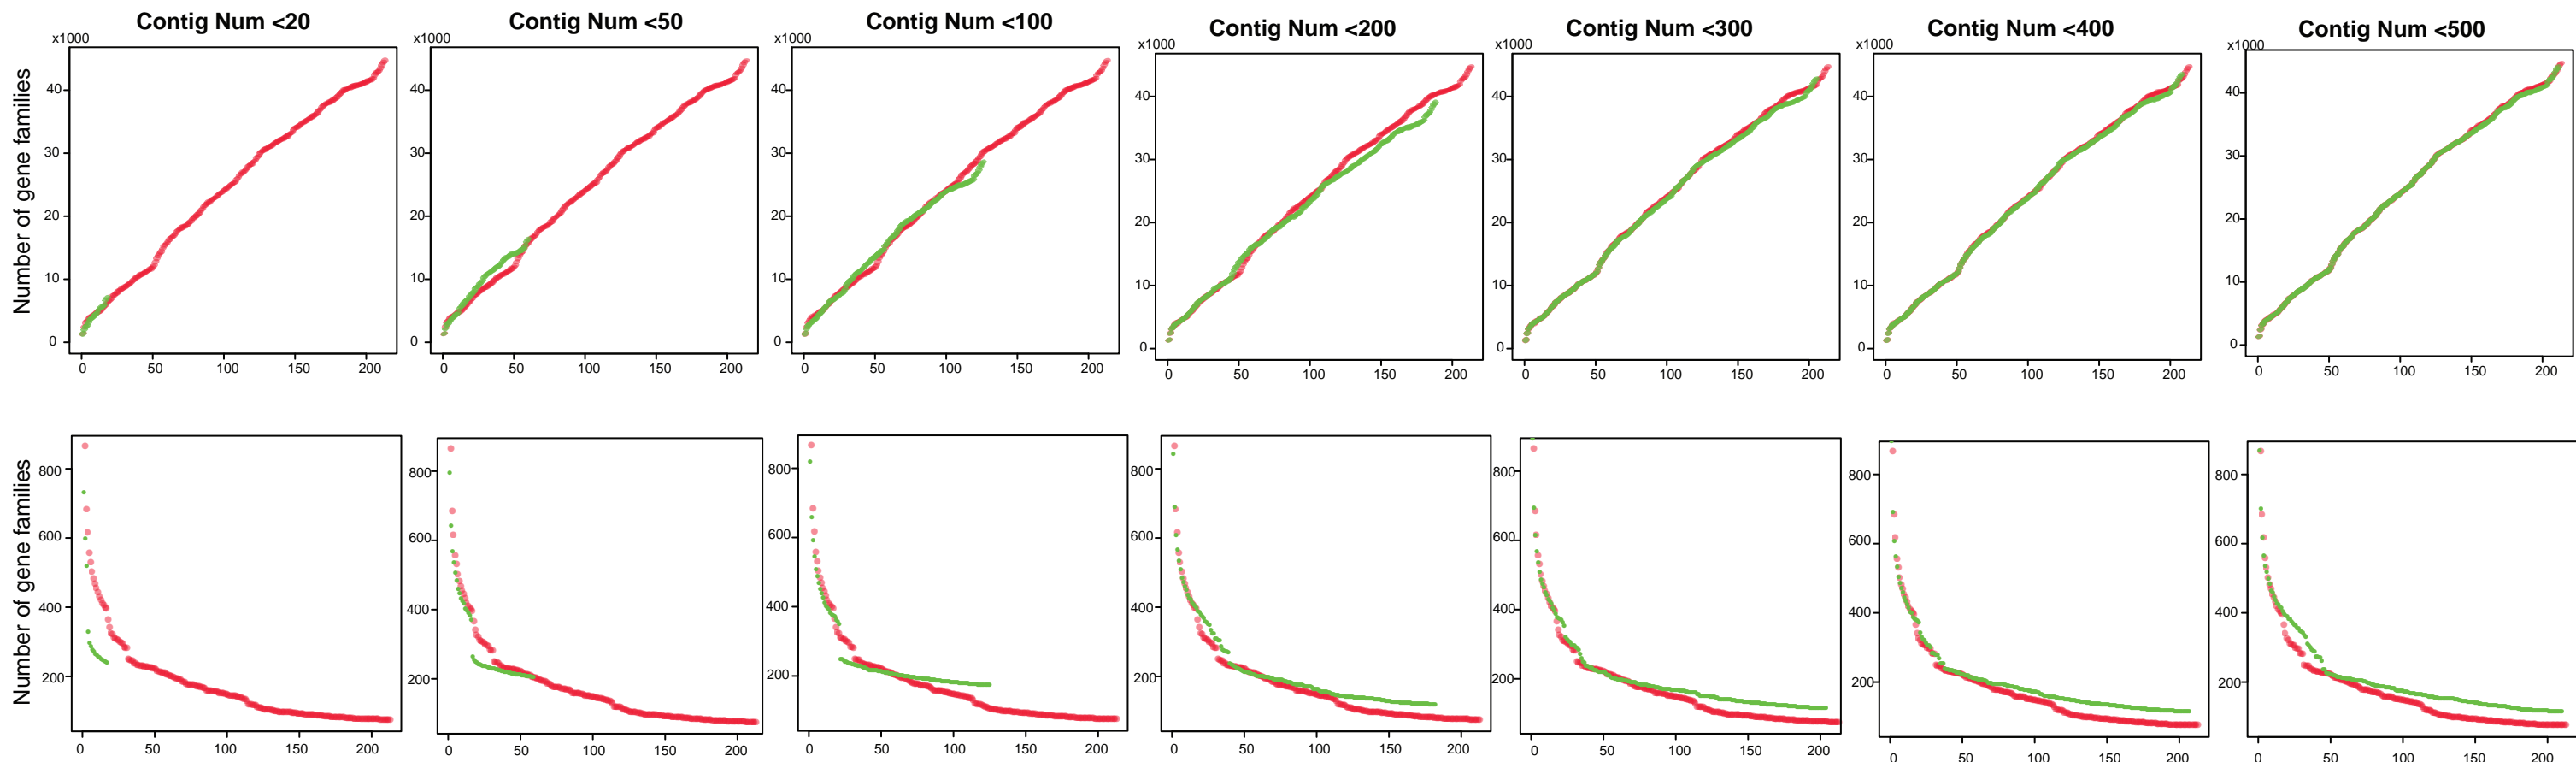

Supp. Figure 2. Sizes of the pan-genome (top) and core-genomes (bottom) in all 213 genomes (red) and in all genomes with less than 20, 50, 100, 200, 300, 400 and 500 contigs (green).

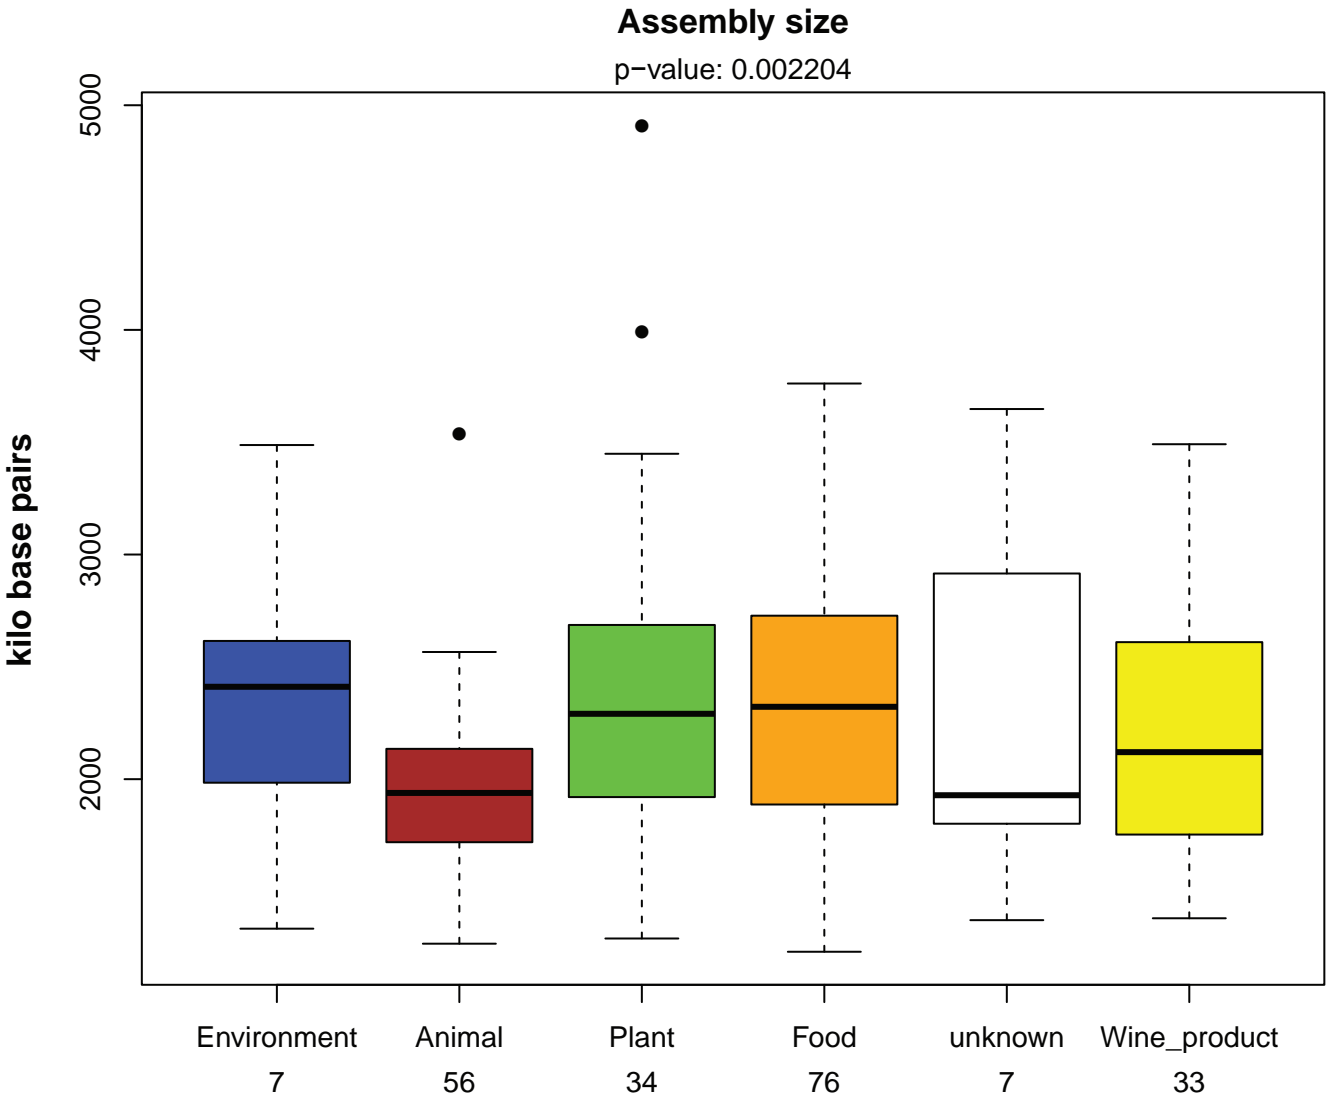

**Supp. Figure 3. Analysis of genome assembly size as a function of niche.** Niche categories are plotted on the x-axis and genome assembly size in kilobase pairs is plotted on the y-axis. Box-plots represent a five-point summary of the data in the following order (from bottom to top); minimum, first quartile, median, third quartile and maximum. Outliers are represented as individual points above or below the boxplot.

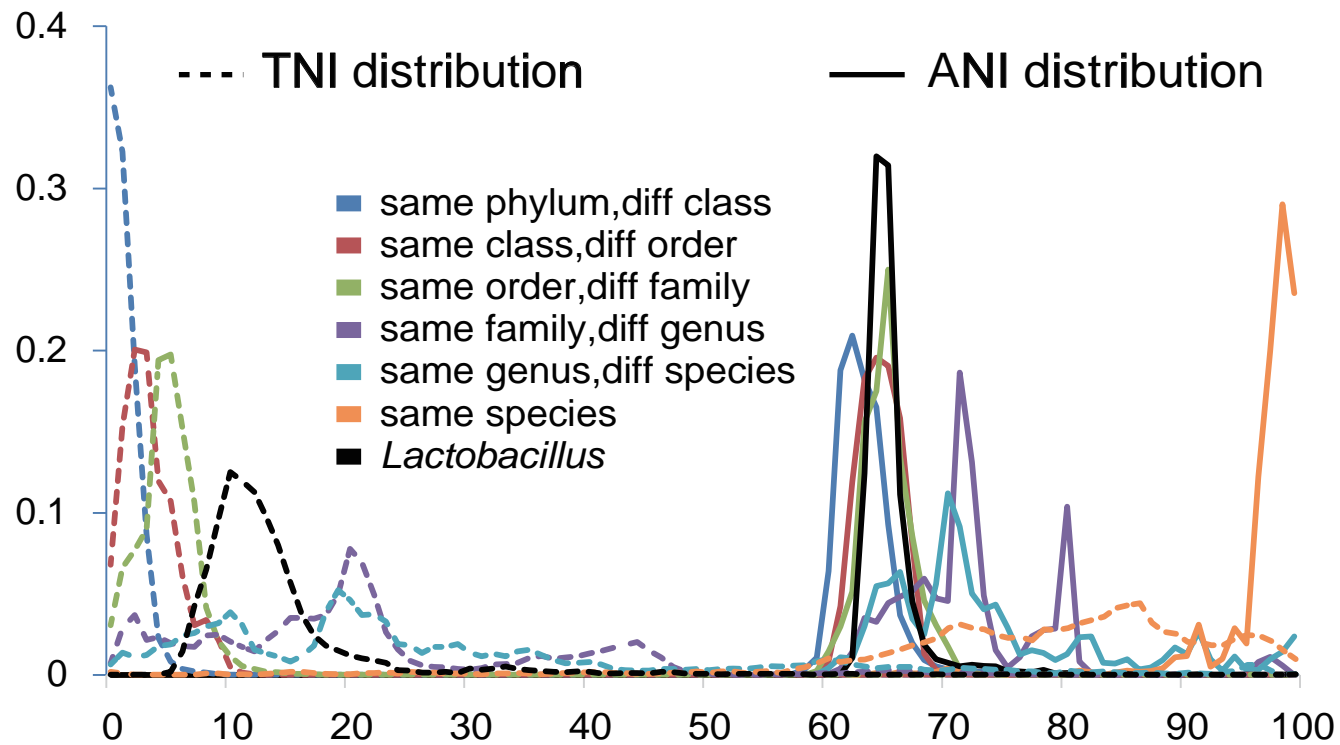

**Supp. Figure 4. Frequency distribution of ANI and TNI values for the *Lactobacillus* species compared to those of traditionally defined taxonomic units.** The black lines indicate the frequency distribution of values for the lactobacilli, which revealed lower values for both ANI and TNI than the majority of strains within the same family but in different genera.

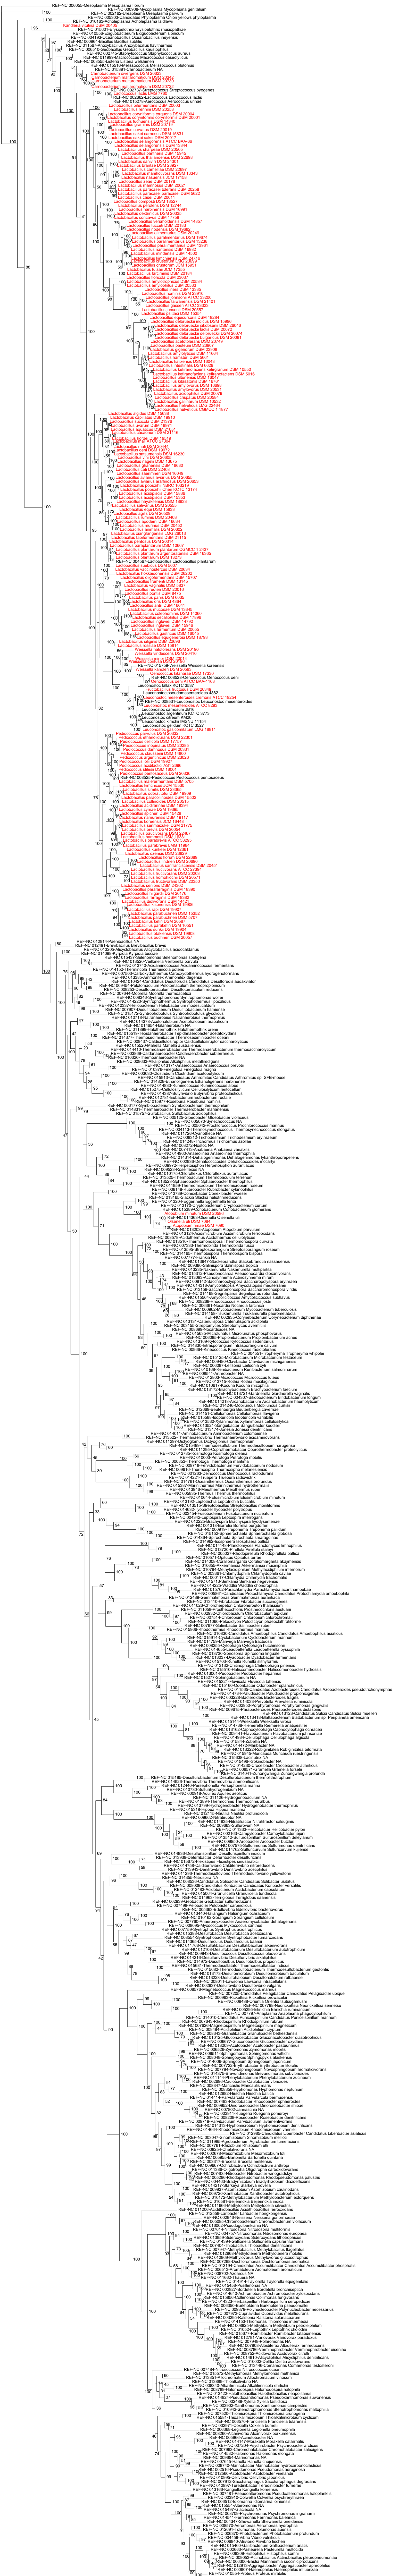

**Supp. Figure 5. Maximum Likelihood tree of published representative genomes that covers 452 genera.** Published representative genomes that covered 452 genera from 26 phyla, as well as the 213 genomes sequenced in this research. The tree was built based on the concatenated amino acid sequences of 16 marker genes by using RAxML with 1000 bootstrap iterations. The numbers at nodes are bootstrap values and the genomes included in this study were indicated by red font.

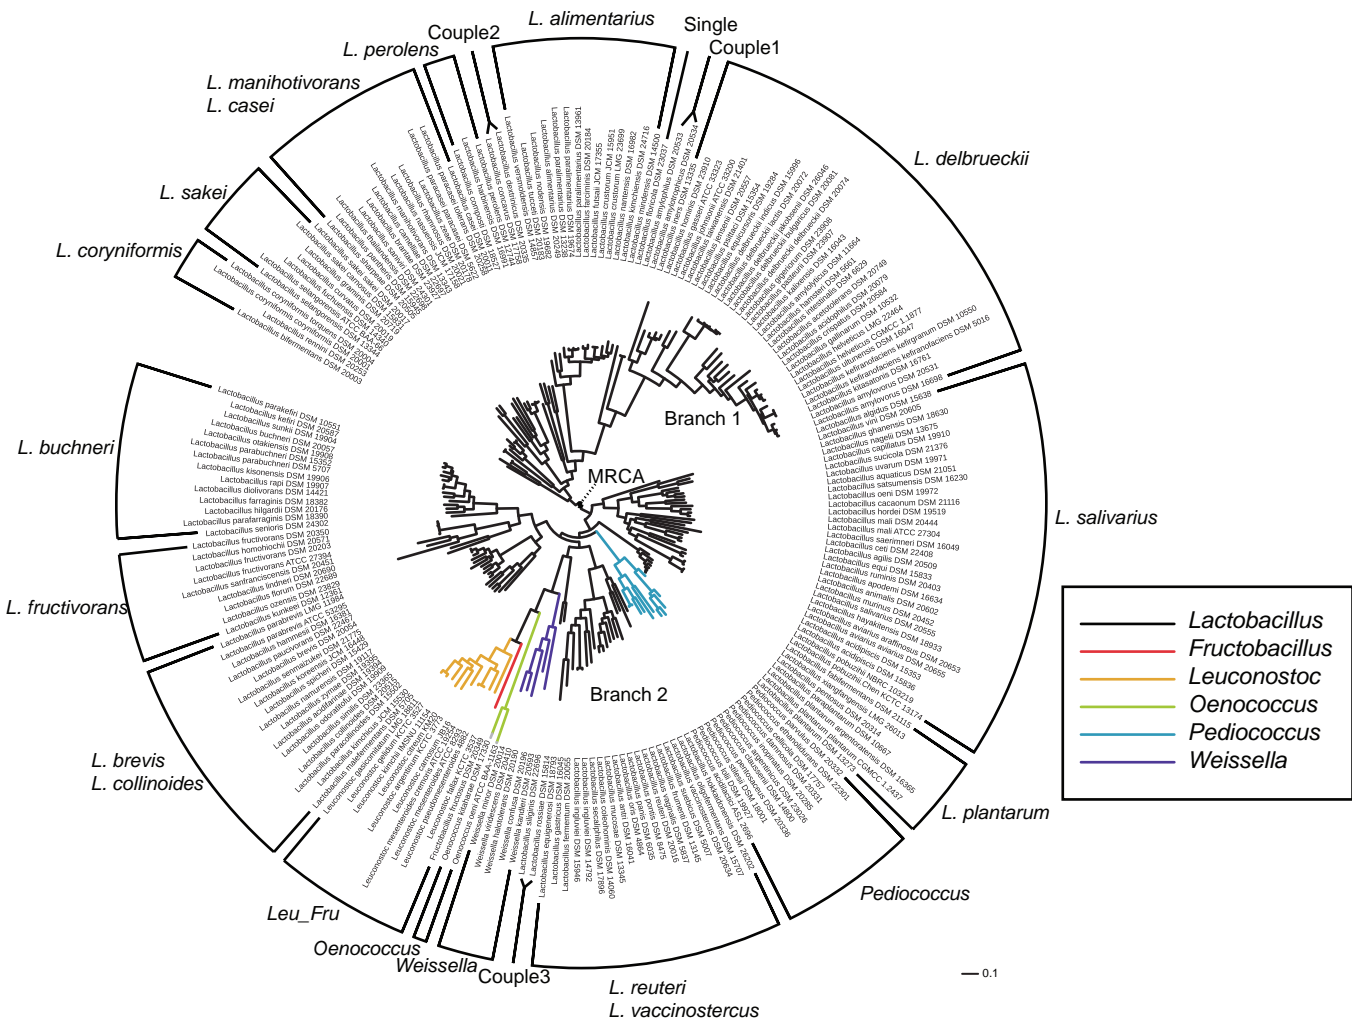

Supp. Figure 6. Maximum likelihood tree of strains of the *Lactobacillus* Genus Complex based on 73 core genes. The branch colors indicate different genera.

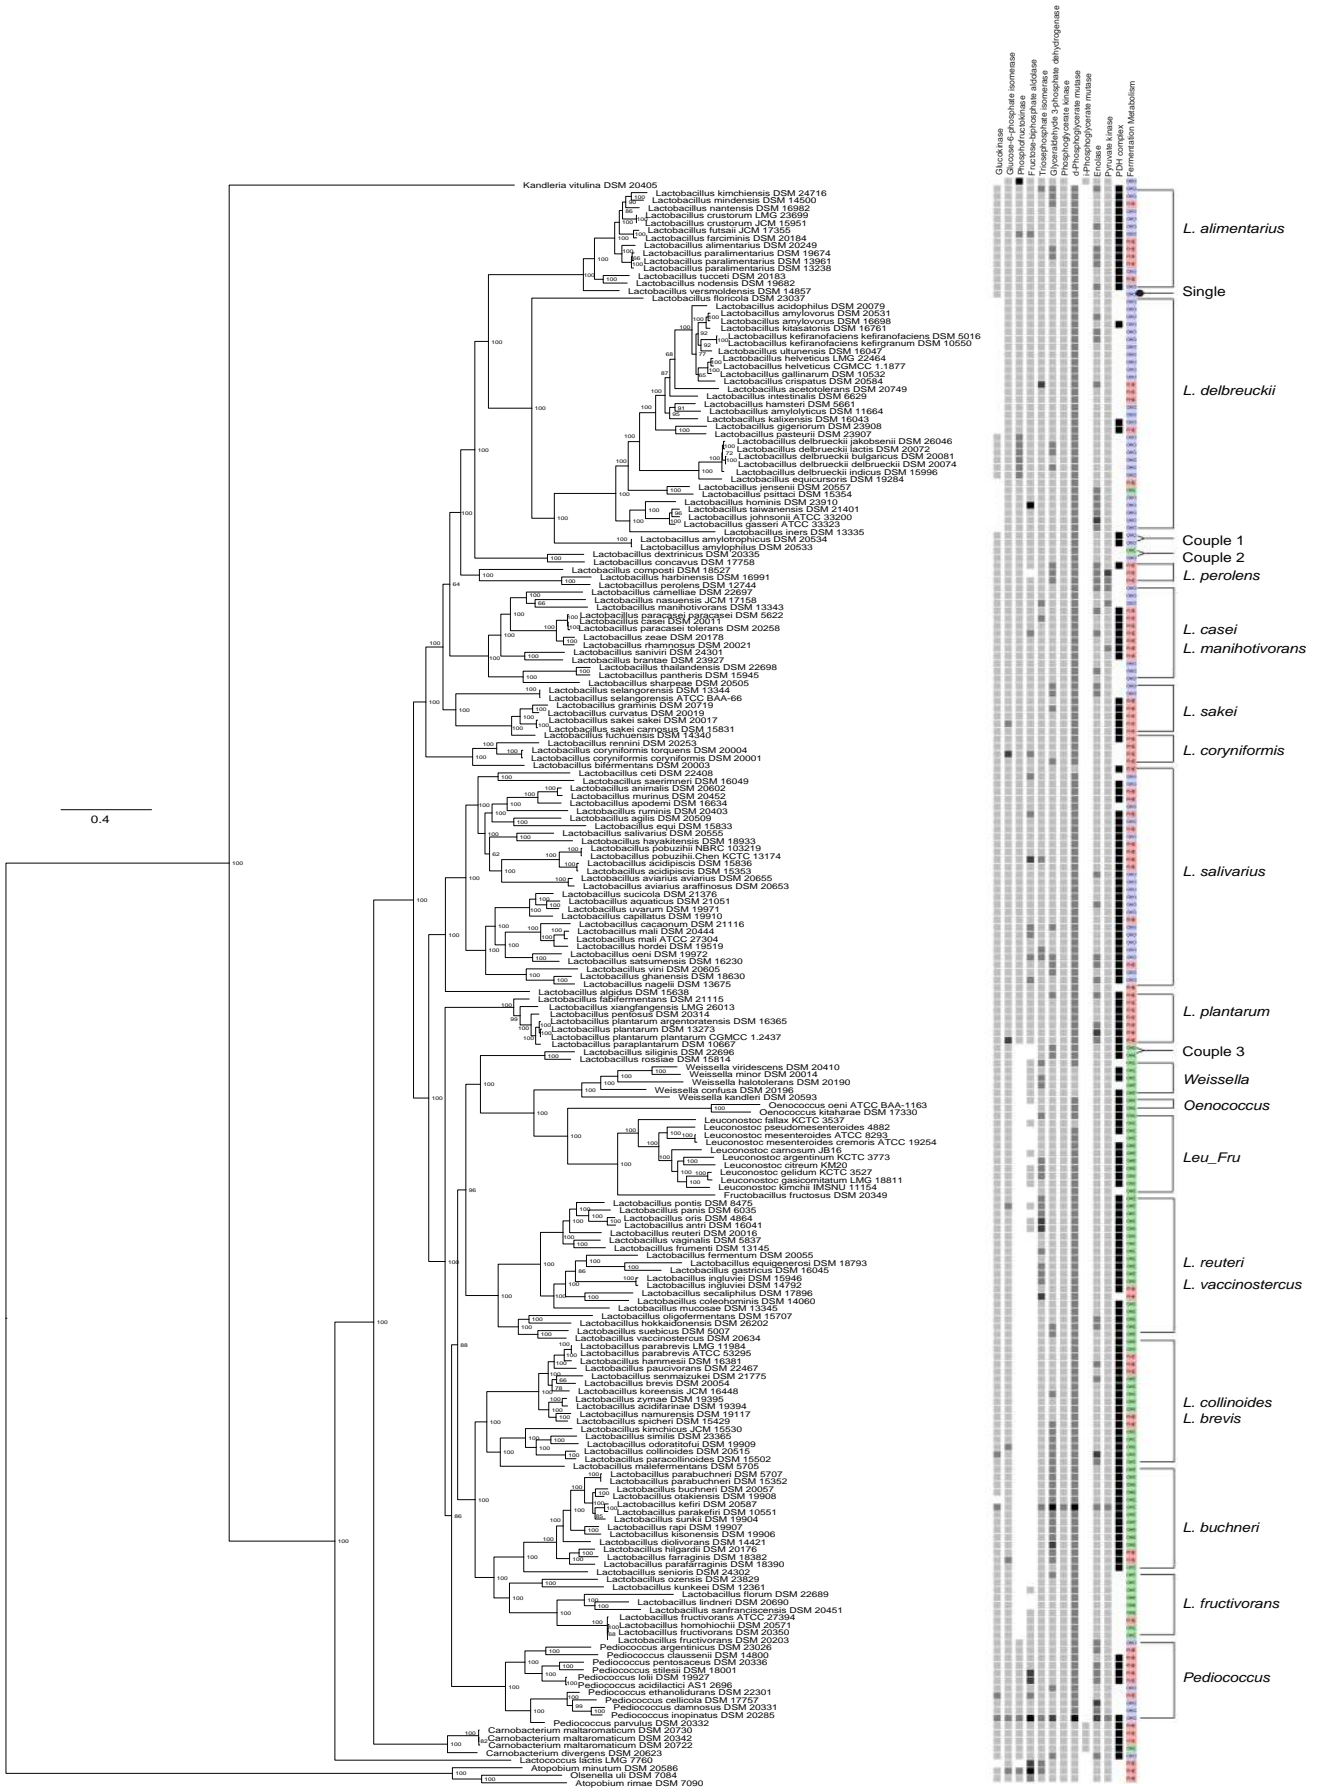

**Supp. Figure 7. Distribution of glycolytic and pyruvate dehydrogenase genes across 213 lactobacilli and related species.** The distribution of phosphoglycerate mutase is discriminated by the presence of genes encoding the cofactor-dependent (d) or the cofactor-independent (i) isofunctional enzymes. For all 10 core glycolytic enzymes, gene distribution is indicated in grey-scale from absence (white) to presence of 4 gene copies (black). For the pyruvate dehydrogenase operon (4 genes), presence of a functional complex is indicated in black, and absence of a functional complex in white. The fermentation metabolism phenotype is indicated as OHO: obligately homofermentative (purple), FHE: facultatively heterofermentative (pink) or OHE: obligately heterofermentative (green).

A

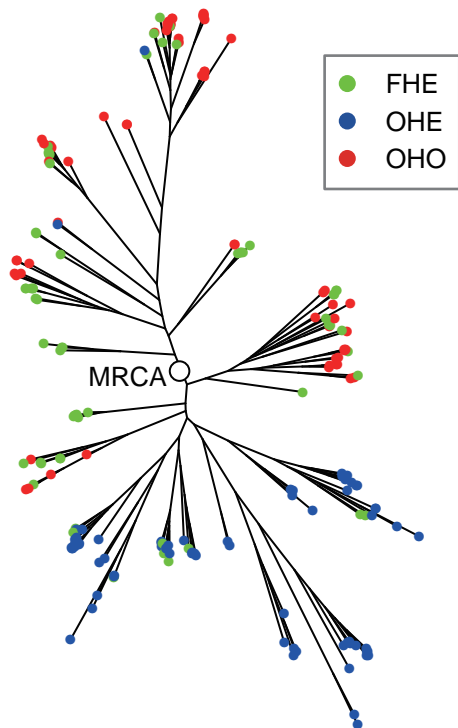

B

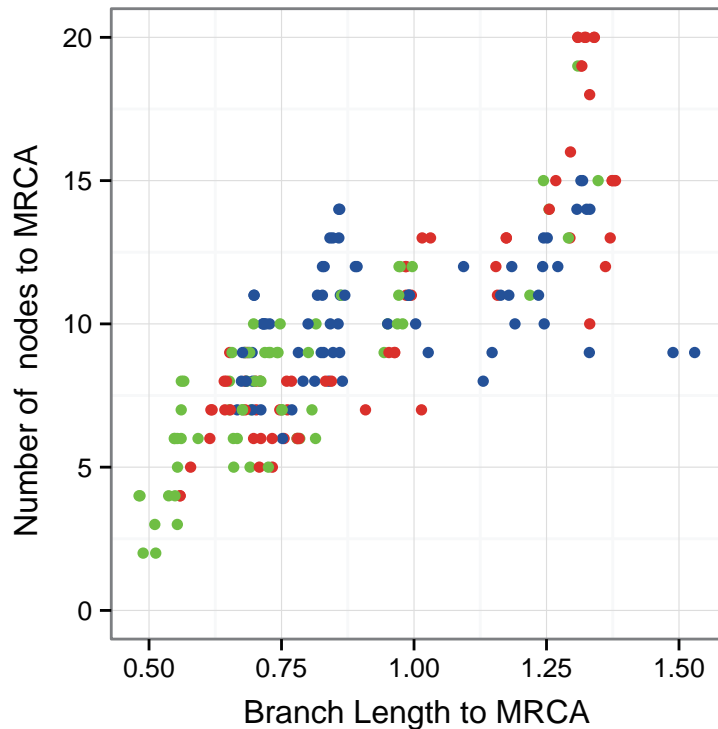

**Supp. Figure 8. Evolution of carbohydrate metabolism in the *Lactobacillus* Genus Complex.** A) Maximum likelihood tree of 204 strains of the *Lactobacillus* Genus Complex based on concatenated amino acid sequence of 73 core genes. The tree was built using RAxML with 100 bootstrap iterations. B) The number of nodes and the branch lengths to the MRCA for each strain/genome. The color of the branches in panel A and the dots in panel B indicate different fermentation types, with green representing FHE, blue representing OHE and red representing OHO.





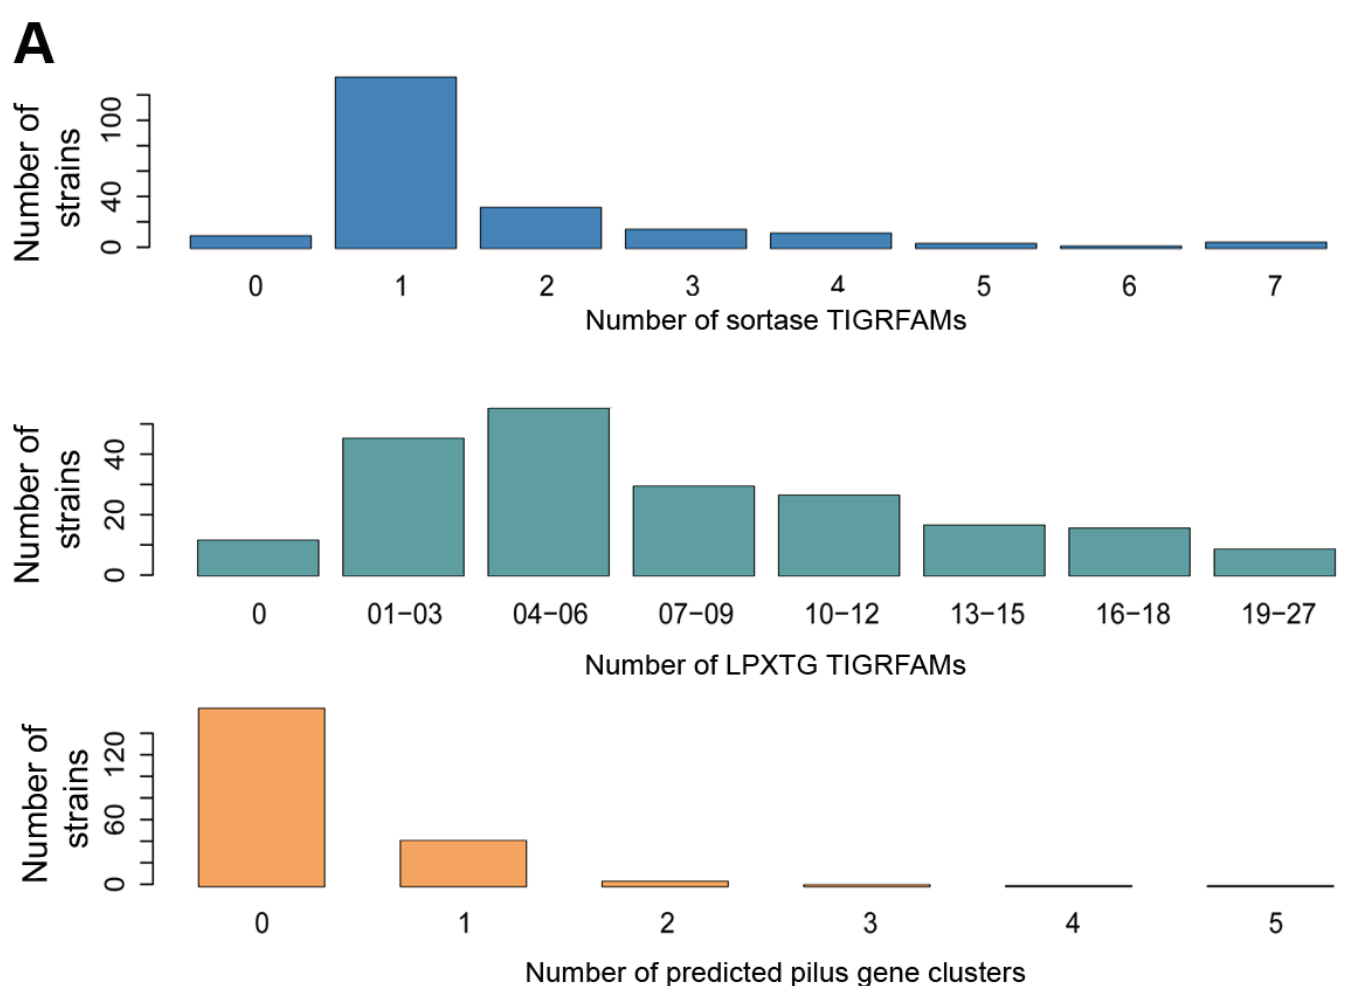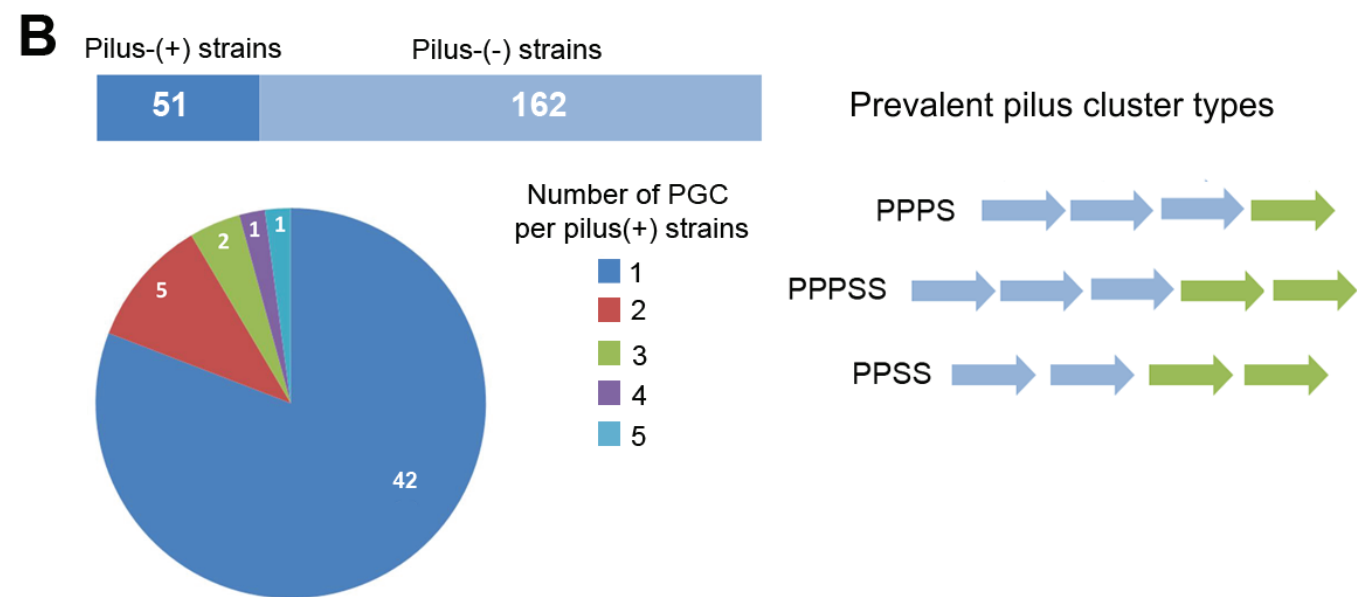

**Supp. Figure 10. Distribution of LPXTG proteins, sortases and pilus gene clusters among the 213 genomes analysed.** Panel A shows the pilus gene clusters (PGCs) that were found in 24% of all analyzed genomes and had prevalently one of the four types illustrated in Panel B Legend: green arrow = sortase gene; blue arrow = pilin gene.

**A**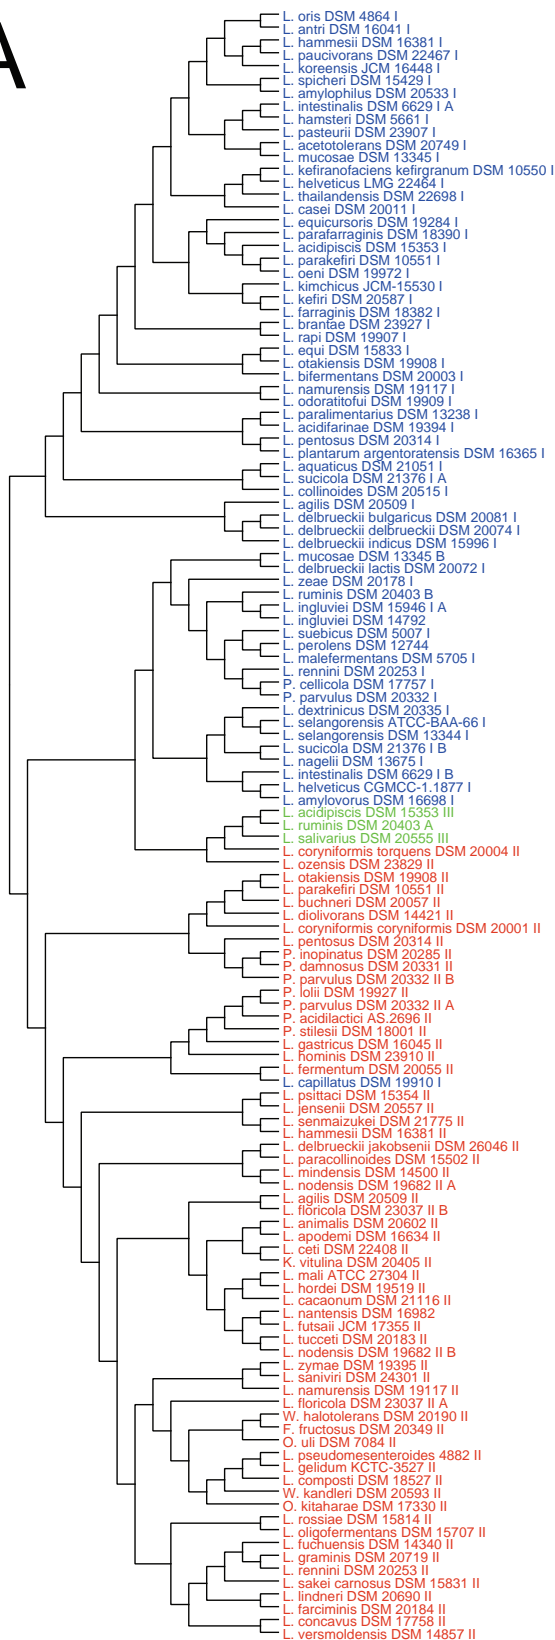**B**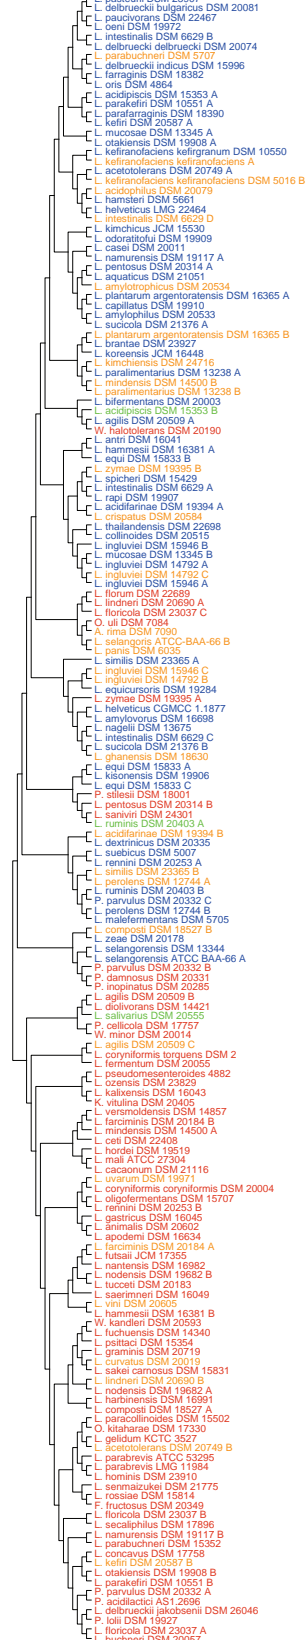

**Supp. Figure 11. Comparative analysis of core CRISPR elements.** The tree in panel A is derived from an alignment of the sequence of the universal Cas protein, Cas1, to create a phylogenetic tree showing the relatedness of all CRISPR-Cas systems in lactobacilli and closely related organisms (see Fig. 5A). The strain designation is followed by I, II, or III, corresponding to the respective CRISPR-Cas system type, using blue, red and green for Type I, II and III systems, respectively. Undefined systems are represented in orange. When multiple Cas1 proteins were found within a genome, they were differentiated by a letter. The tree in panel B is derived from an alignment of the CRISPR repeat sequences. All strain names correlate with the master CRISPR table (Supplementary Table 7). When a strain had multiple CRISPR repeats, they were given different letters to distinguish the repeats.

**A**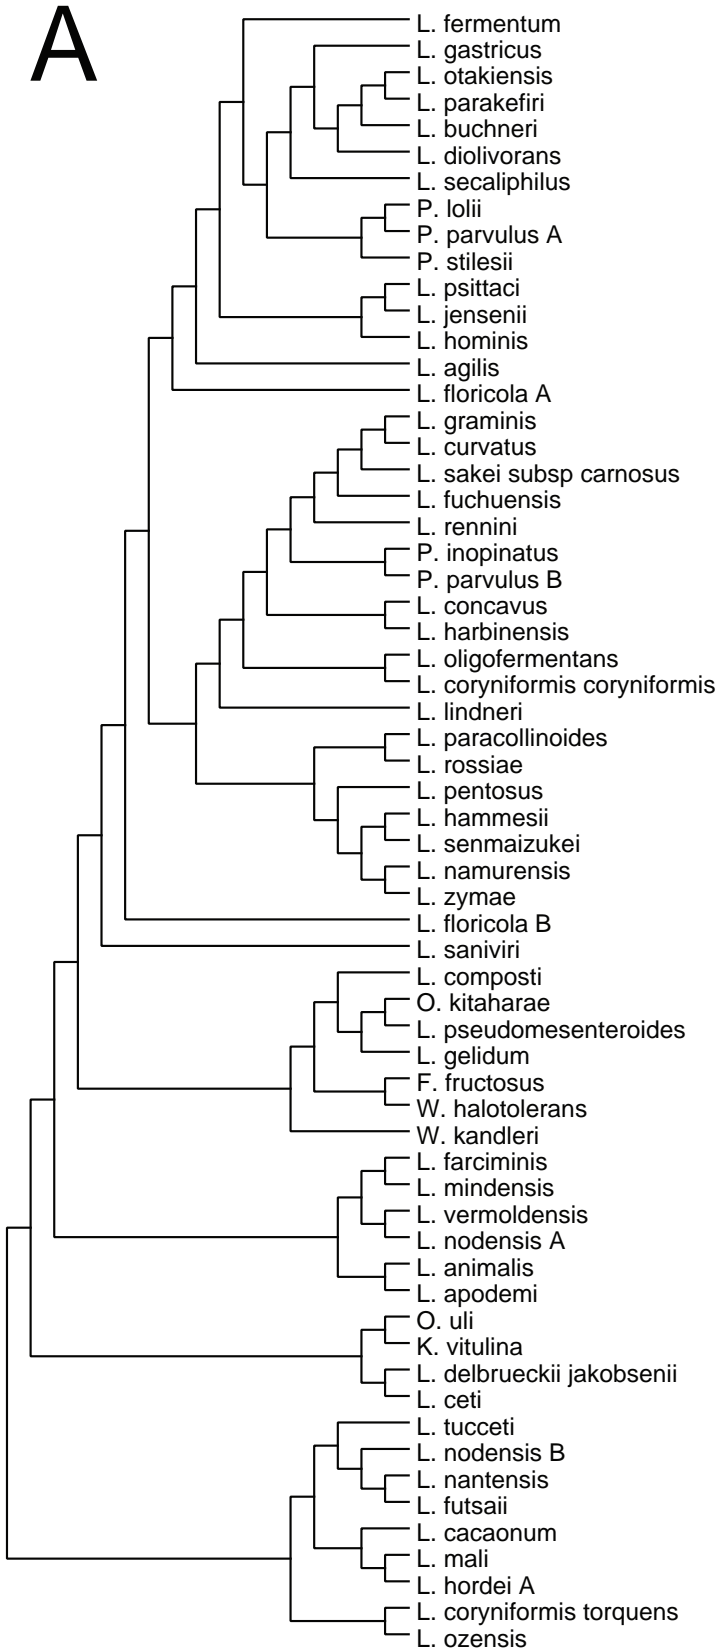**B**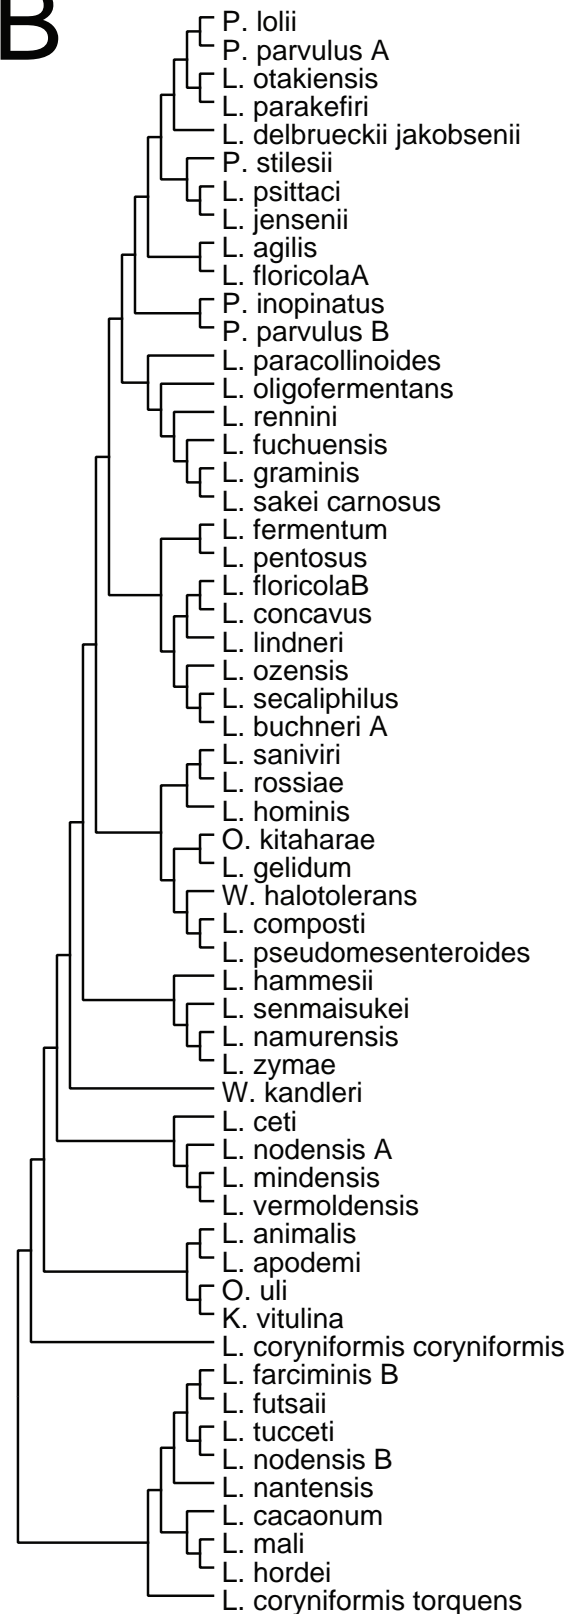

**Supp. Figure 12. Comparative analysis of Type II CRISPR-Cas systems.** The tree in panel A is derived from an alignment of the sequence of the Type II signature Cas protein, Cas9, to create a phylogenetic tree showing the relatedness of Cas9 proteins from Type II-A and II-C systems (see Fig. 5B). The tree in panel B is derived from an alignment of the predicted tracrRNA sequences for Type II-A systems.





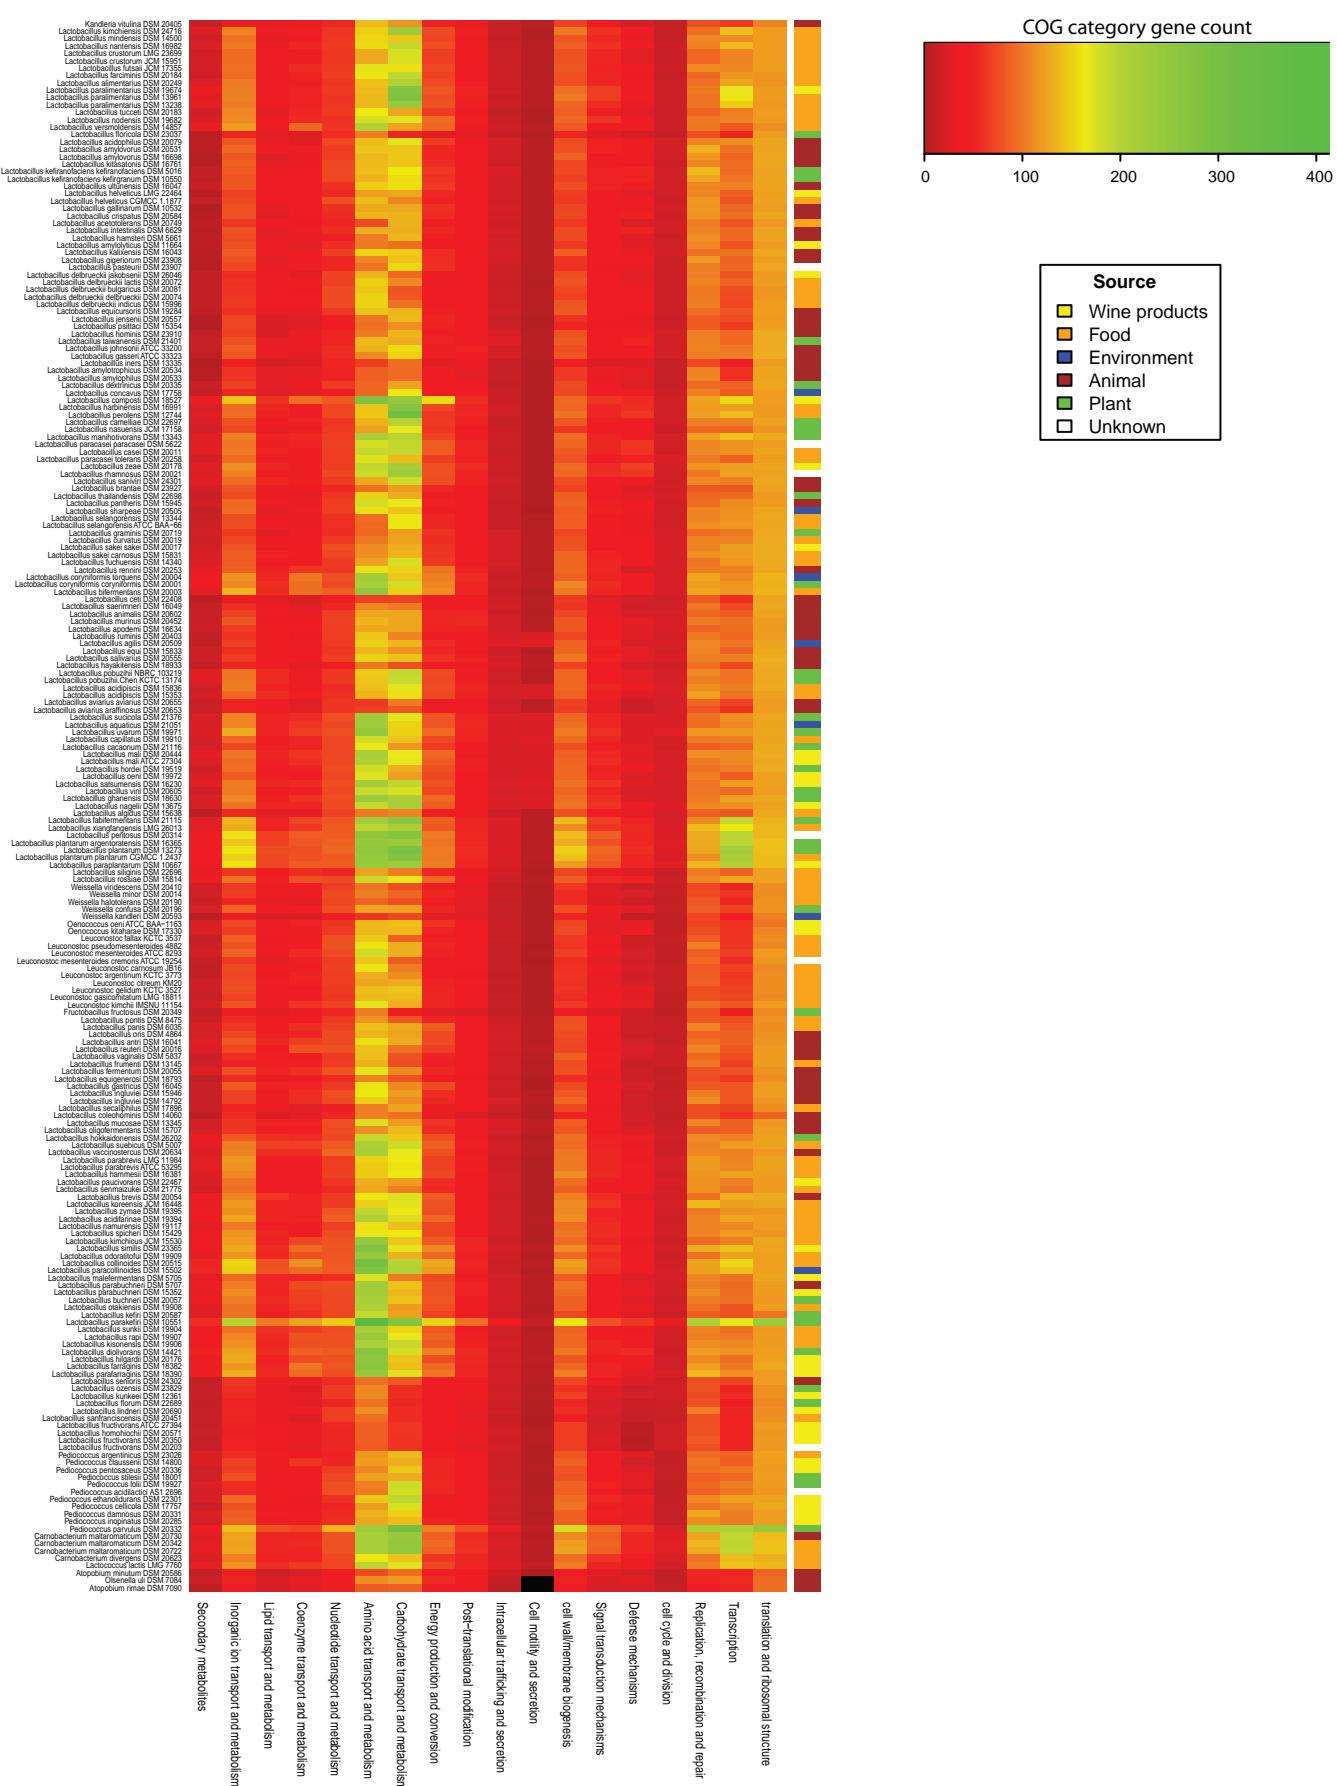

**Supp. Figure 15. Heatmap of the distribution and abundance of 18 different COG categories across the 213 genomes.** Number of genes assigned to each of the different COG categories is indicated by the color bar from black (absent) to green. Strains are ordered from top to bottom as they appear top-down in the phylogeny (Fig. 2) with source information by the color bar along the top of the heatmap.

IS family gene count

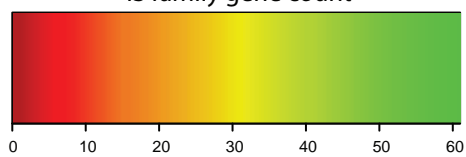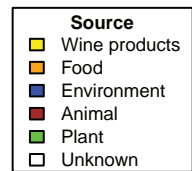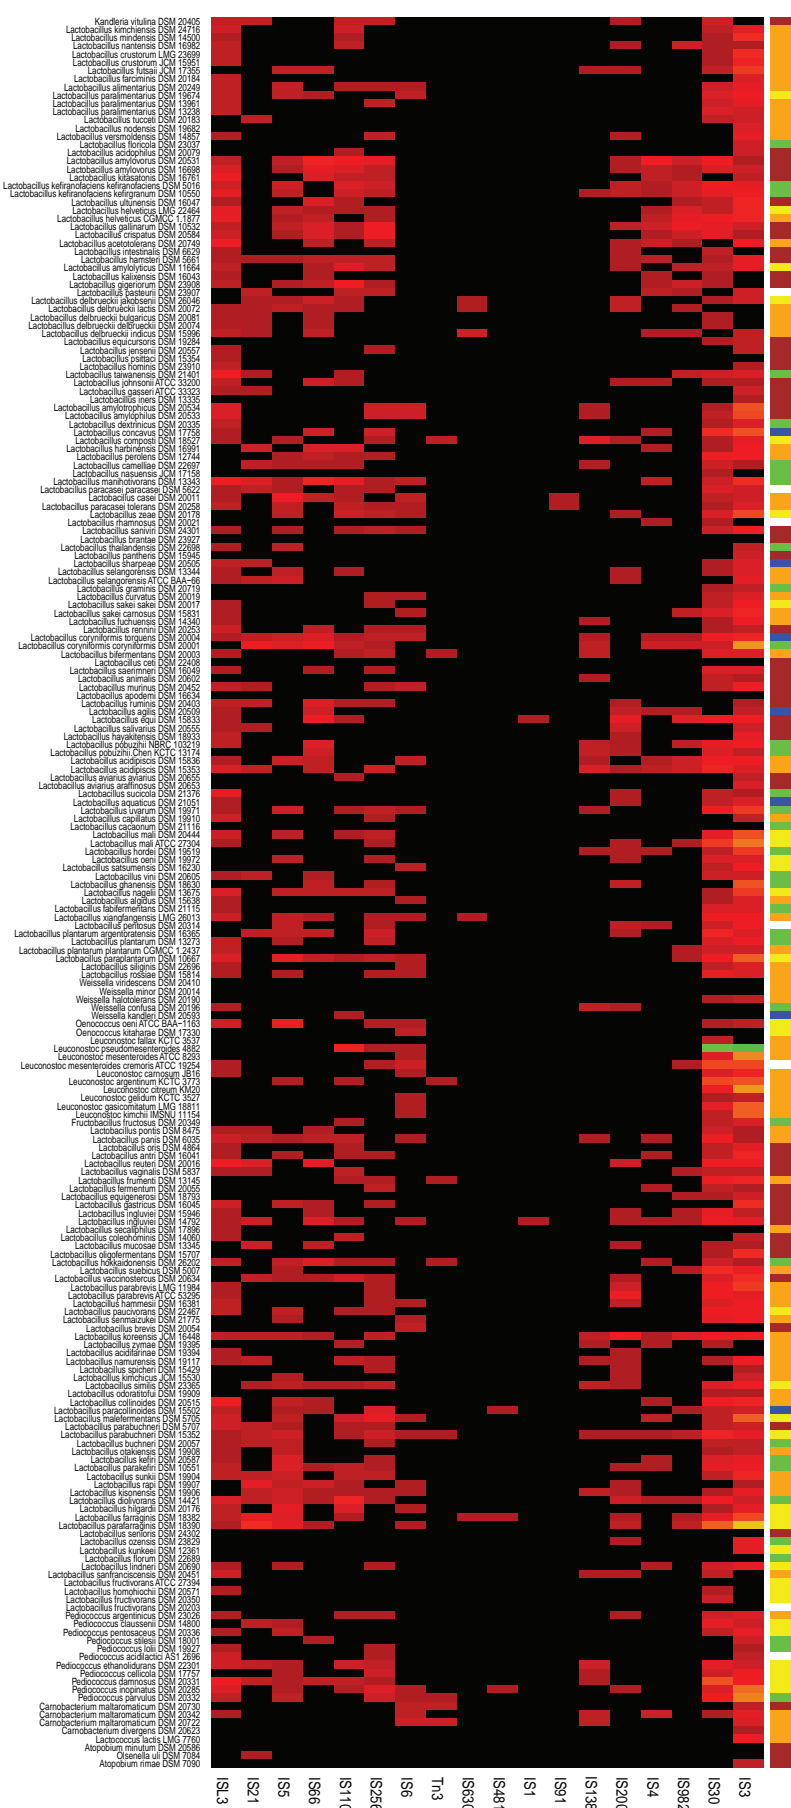

**Supp. Figure 16. Heatmap of the distribution and abundance of 18 insertion sequence families across the 213 genomes.** The number of genes assigned to each IS family is indicated by the color bar from black (absent) to green. The strains appear from top to bottom as they are featured top-down in the phylogeny (Fig. 2). Source information for each strain is indicated by a color bar along the top of the heatmap.



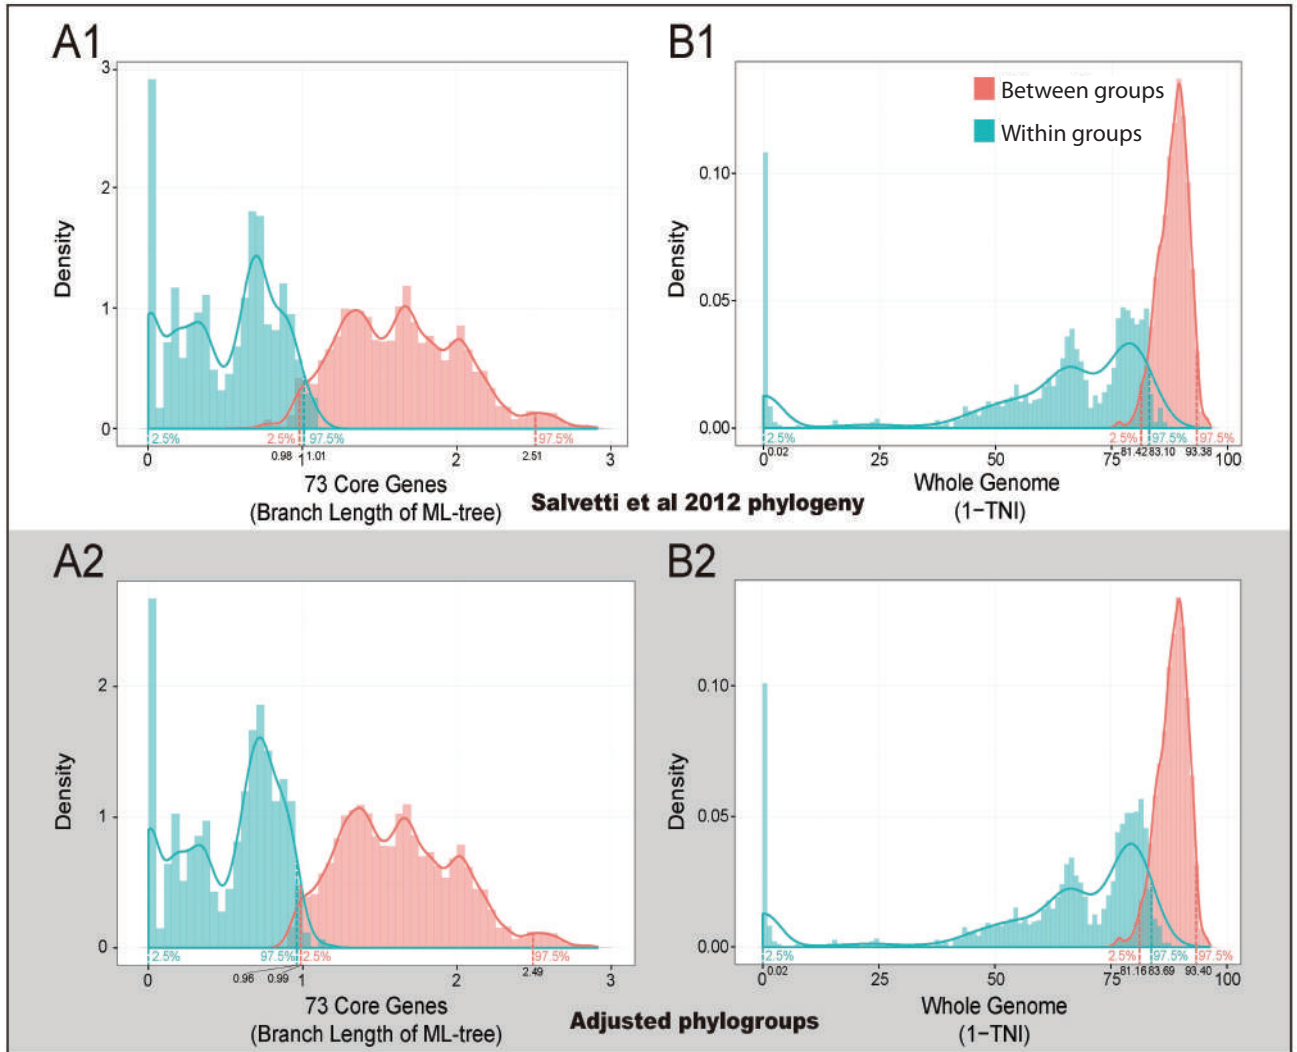

**Supp. Figure 17. Branch length distribution and TNI value distribution (1-TNI).** A current phylogrouping of the *Lactobacillus* Genus complex and a manually curated phylogrouping based on the maximum likelihood tree of 73 core genes (this study; see Supplementary Figure 18).

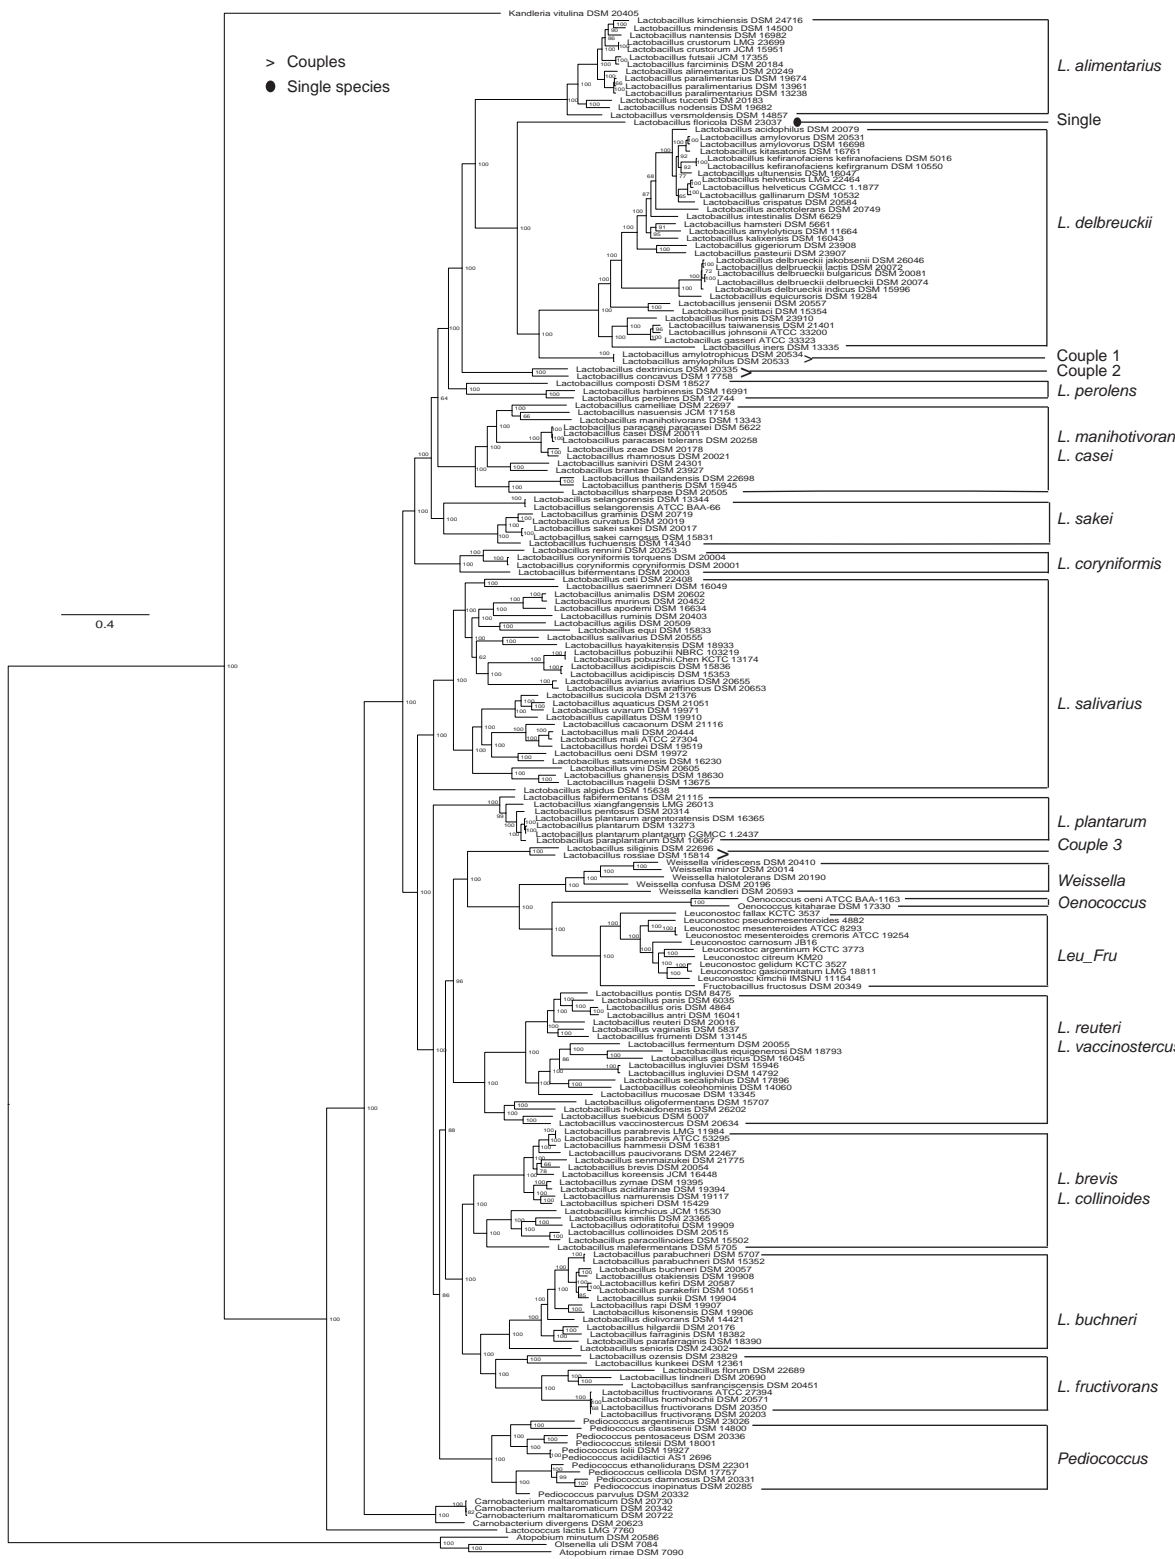

**Supp. Figure 18. Manually curated phylogrouping of the *Lactobacillus* complex and associated genera based on 73 core genes maximum likelihood phylogeny.** According to this revised phylogrouping, when the branch length between two strains is greater than 0.99, the probability is very high (>97.5%) that they belong to different phylogroups, and when the branch length is less than 0.96 between two strains, the probability that they belong to the same phylogroup is > 97.5%. Compared to the existing phylogrouping in Salveti et al., 2012, the adjustments made here are:

1. Two species, *L. amylotrophicus* and *L. amylophilus* that originally belonged to the *L. delbrueckii* group were excluded from *L. delbrueckii* and defined as a new Couple.
2. The single species *L. composti* was combined with the phylogroup *L. perolens*.
3. The phylogroup *L. casei* and *L. manihotivrans* were combined together with the previously defined single species, *L. camelliae*, *L. saniviri*, *L. brantae*, *L. sharpeae*, and the Couple that contained *L. thailandensis* and *L. pantheris*, was defined as a single phylogroup.
4. The single species *L. algidus* was combined with the phylogroup *L. salivarius*.
5. *Leuconostoc* and *Fructobacillus* were defined as a single phylogroup.
6. The phylogroups *L. reuteri* and *L. vaccinostercus* were combined together.
7. The phylogroups *L. brevis* and *L. collinoides* and a single species, *L. malefermentans*, were combined as a single phylogroup.
8. *L. senioris* was combined with the phylogroup *L. buchneri*.
9. The couple that contained *L. ozensis* and *L. kunkelii* was combined into the phylogroup *L. fructivorans*.

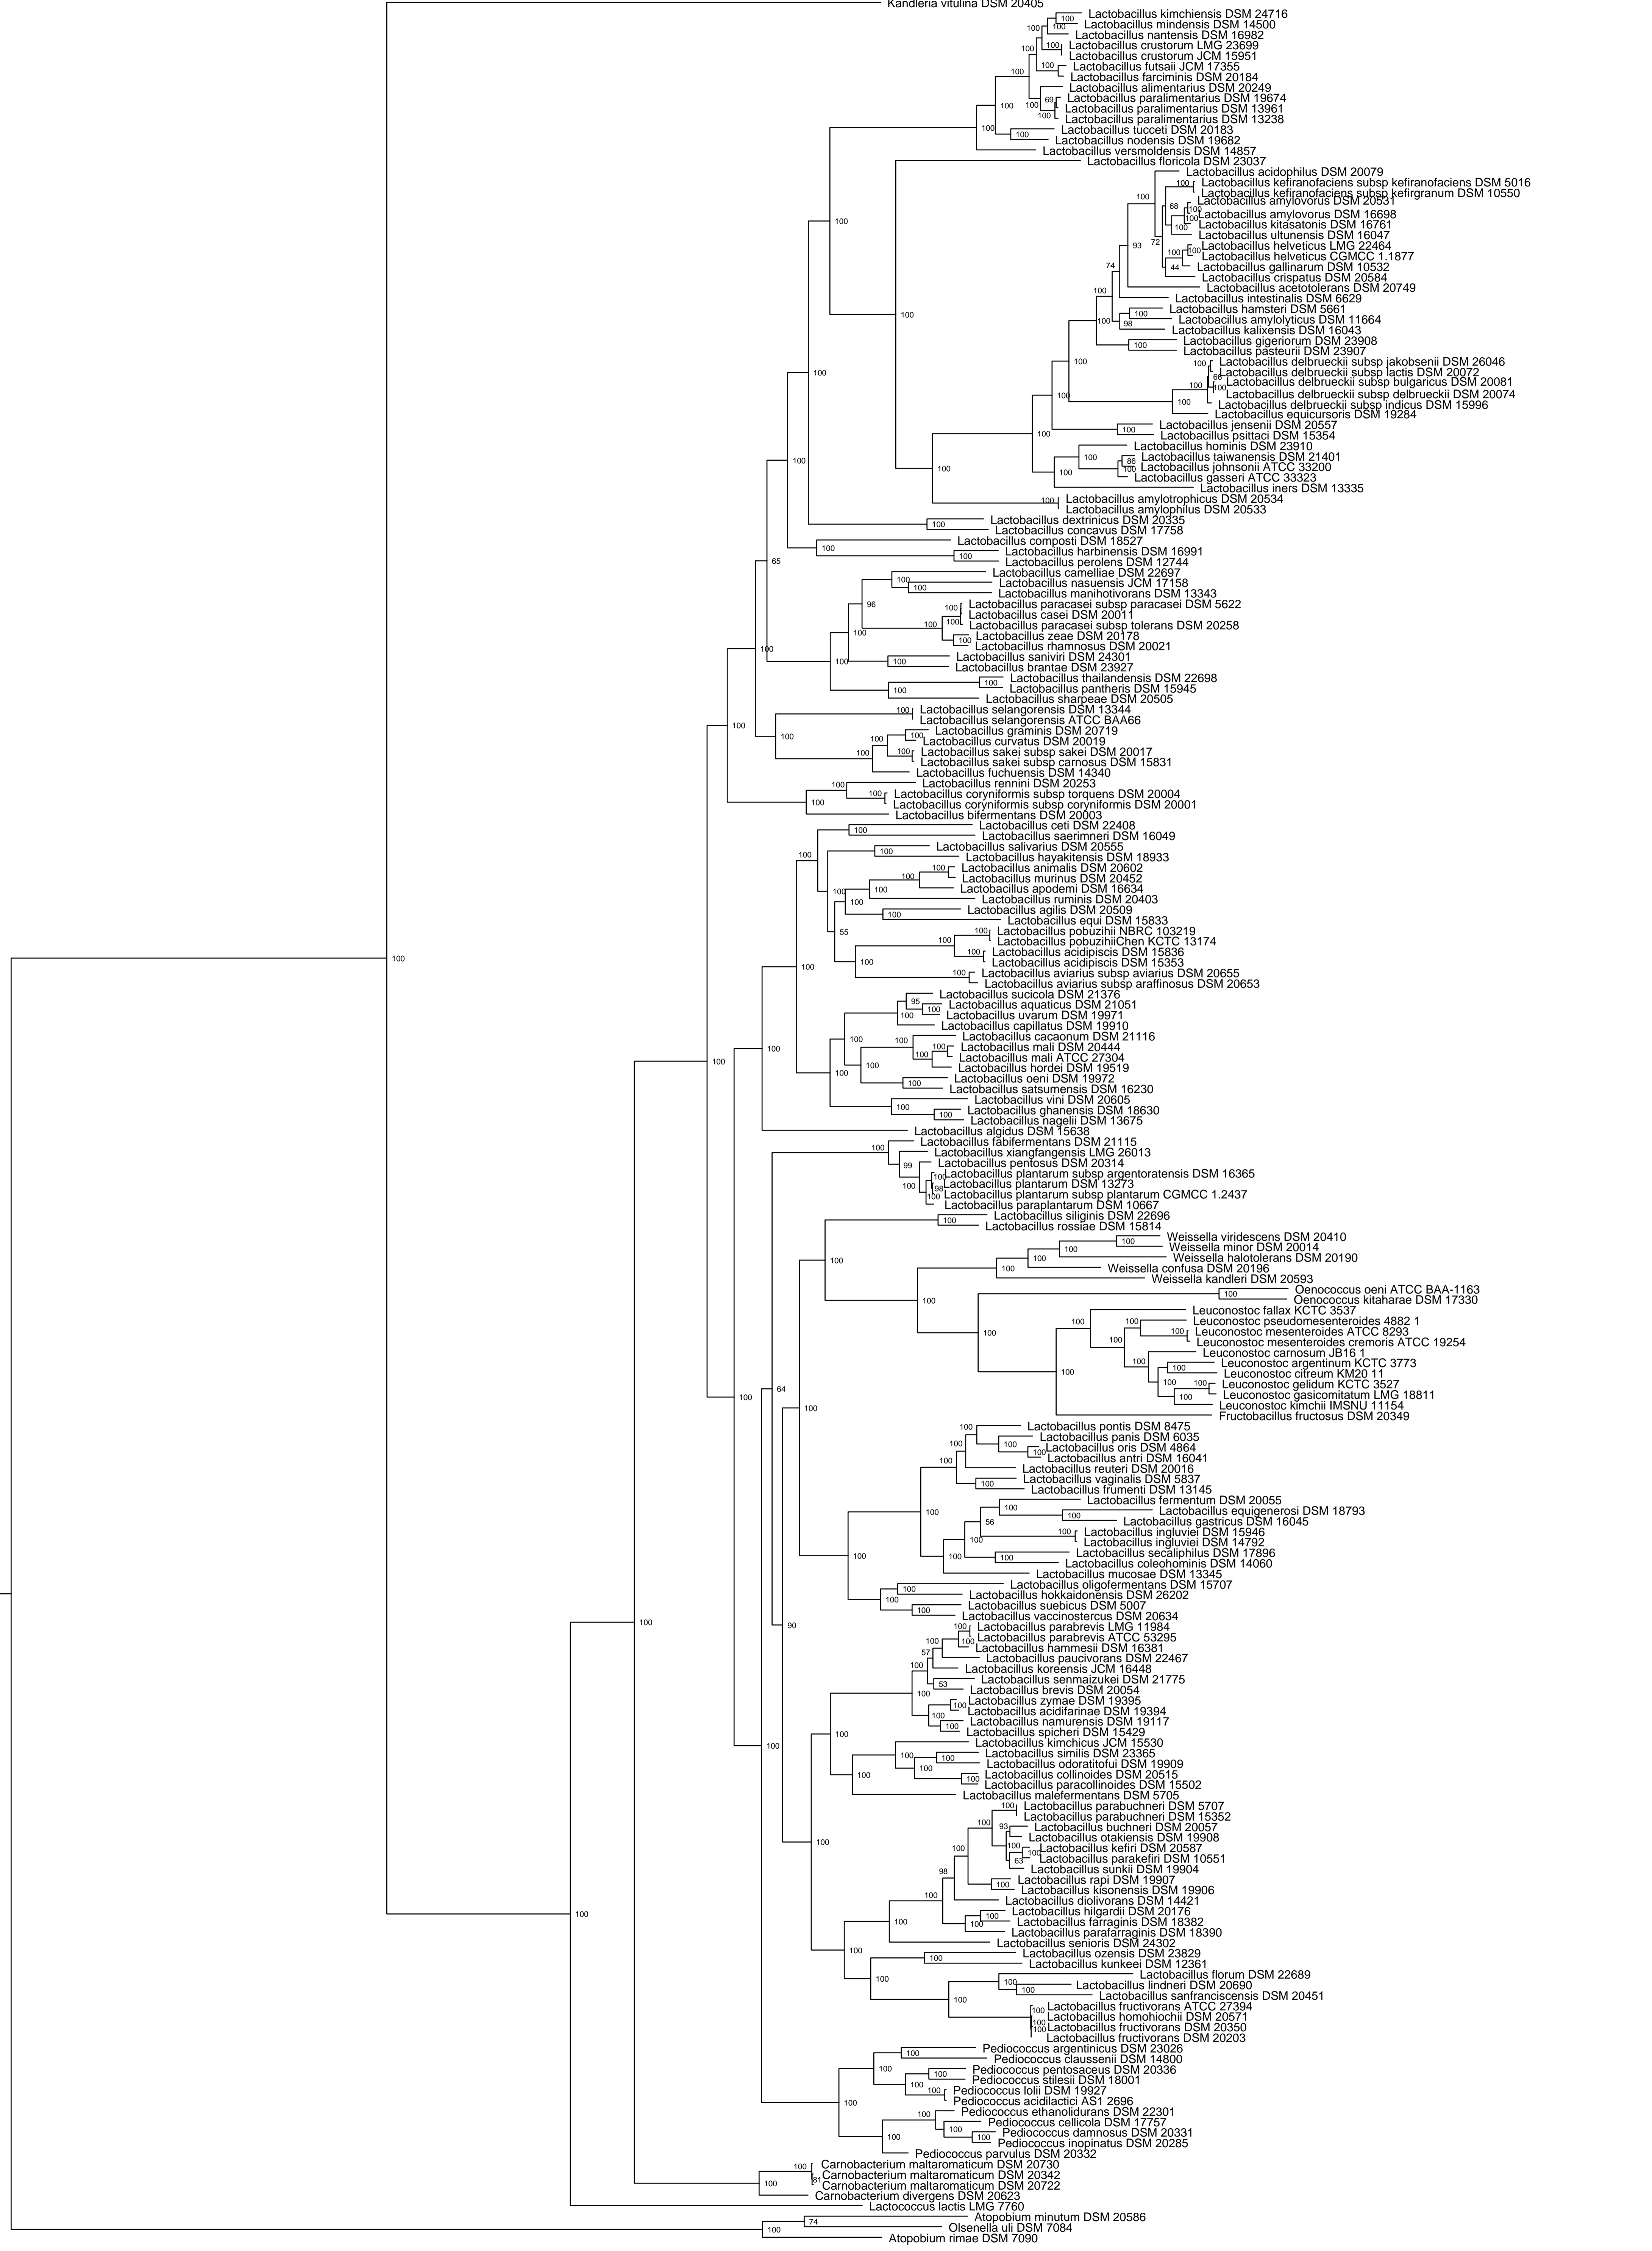

Supp. Figure 19. Phylogeny inferred from a 100 core gene dataset (27 partial + 73 complete core genes).

## Color key and histogram

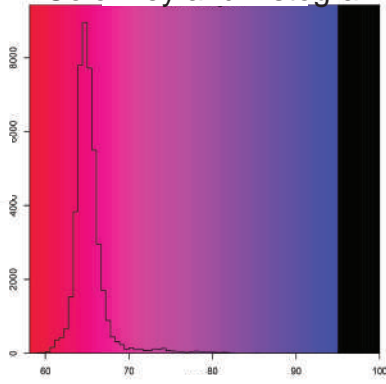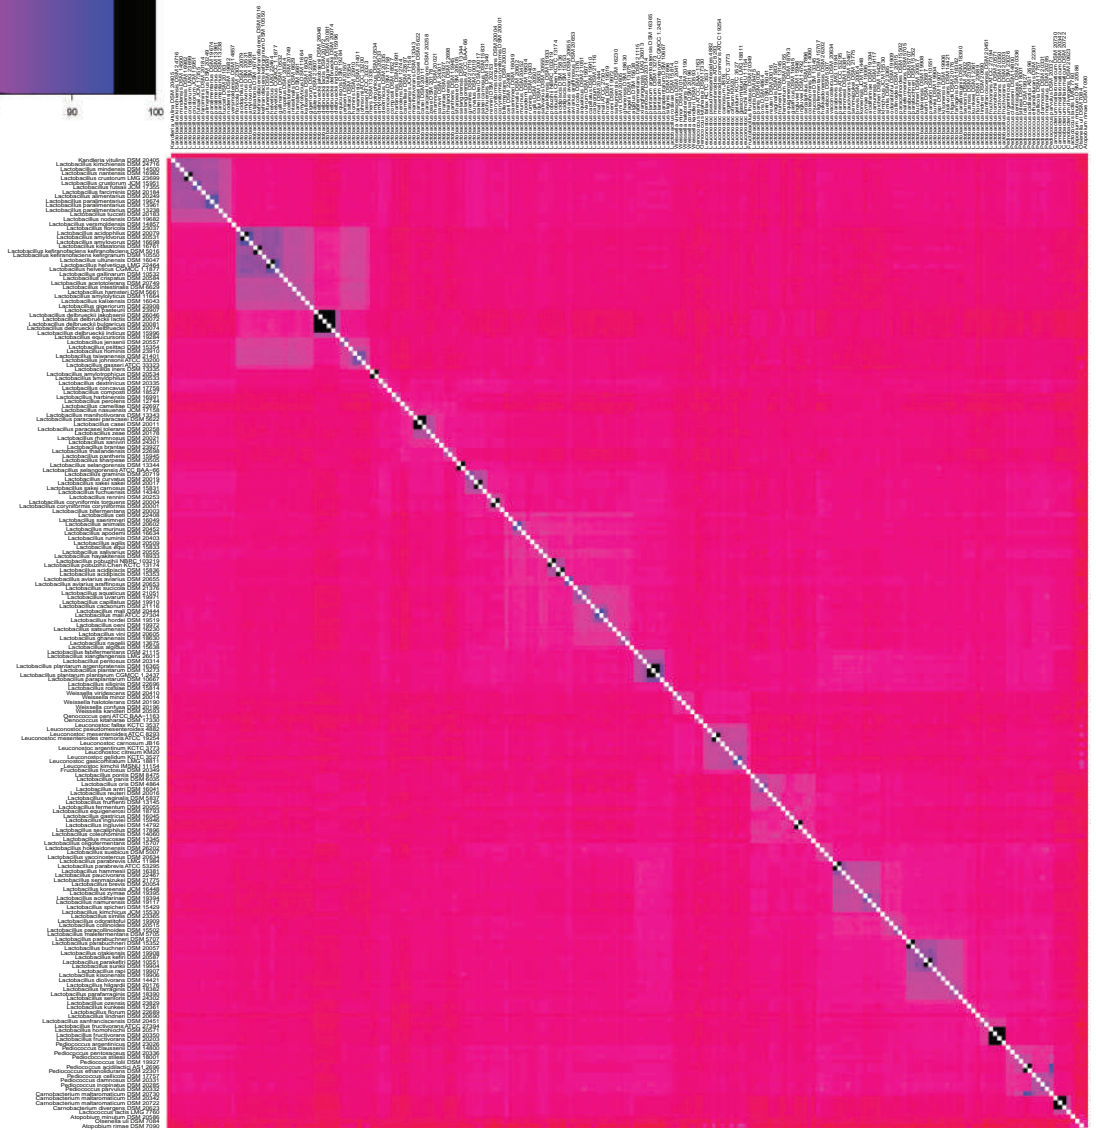

**Supp. Figure 20. Heatmap of pairwise ANI values for 213 genomes.** The order of the rows (top to bottom) and columns (left to right) is according to their position in the phylogenetic tree based on 73 core proteins (Fig. 2).

**Carbohydrate transport against GHs**

Pearson correlation = 0.69

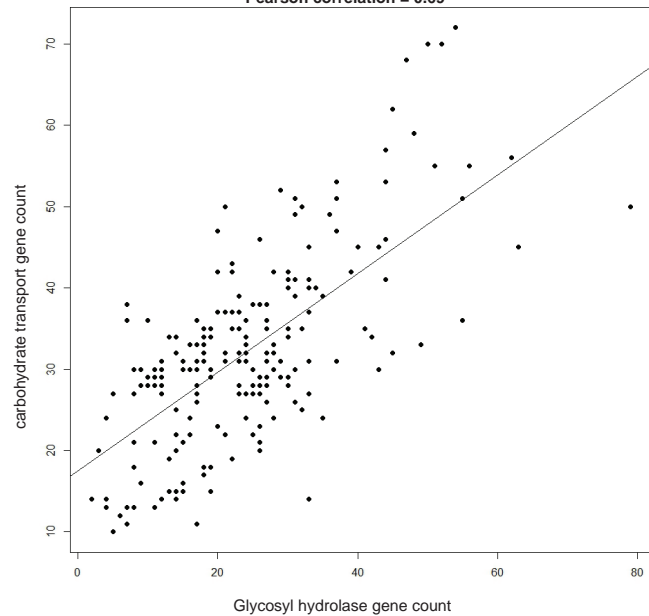

**Carbohydrate transport against GTs**

Pearson correlation = 0.67

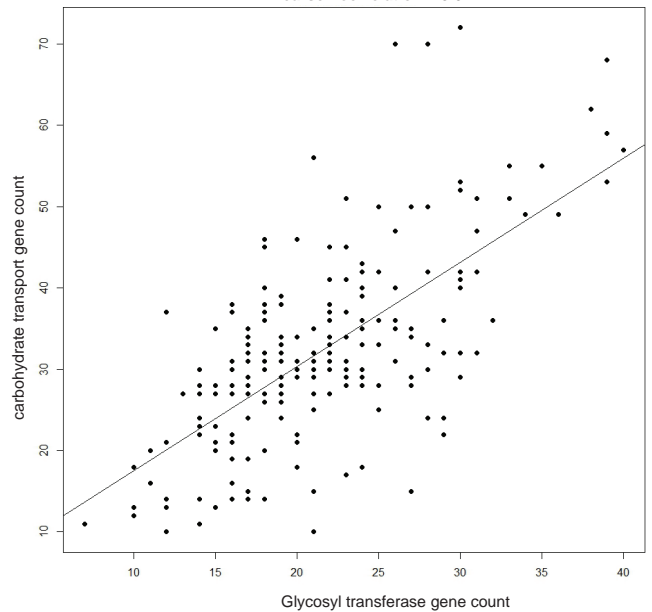

**Supp. Figure 21. Scatterplots showing the correlation between the number of carbohydrate transport genes (y-axes) and the number of glycosyl hydrolase genes (x axis; left) and the number of glycosyl transferase genes (x-axis; right). The line of best fit for each plot was estimated using a least squares linear model.**

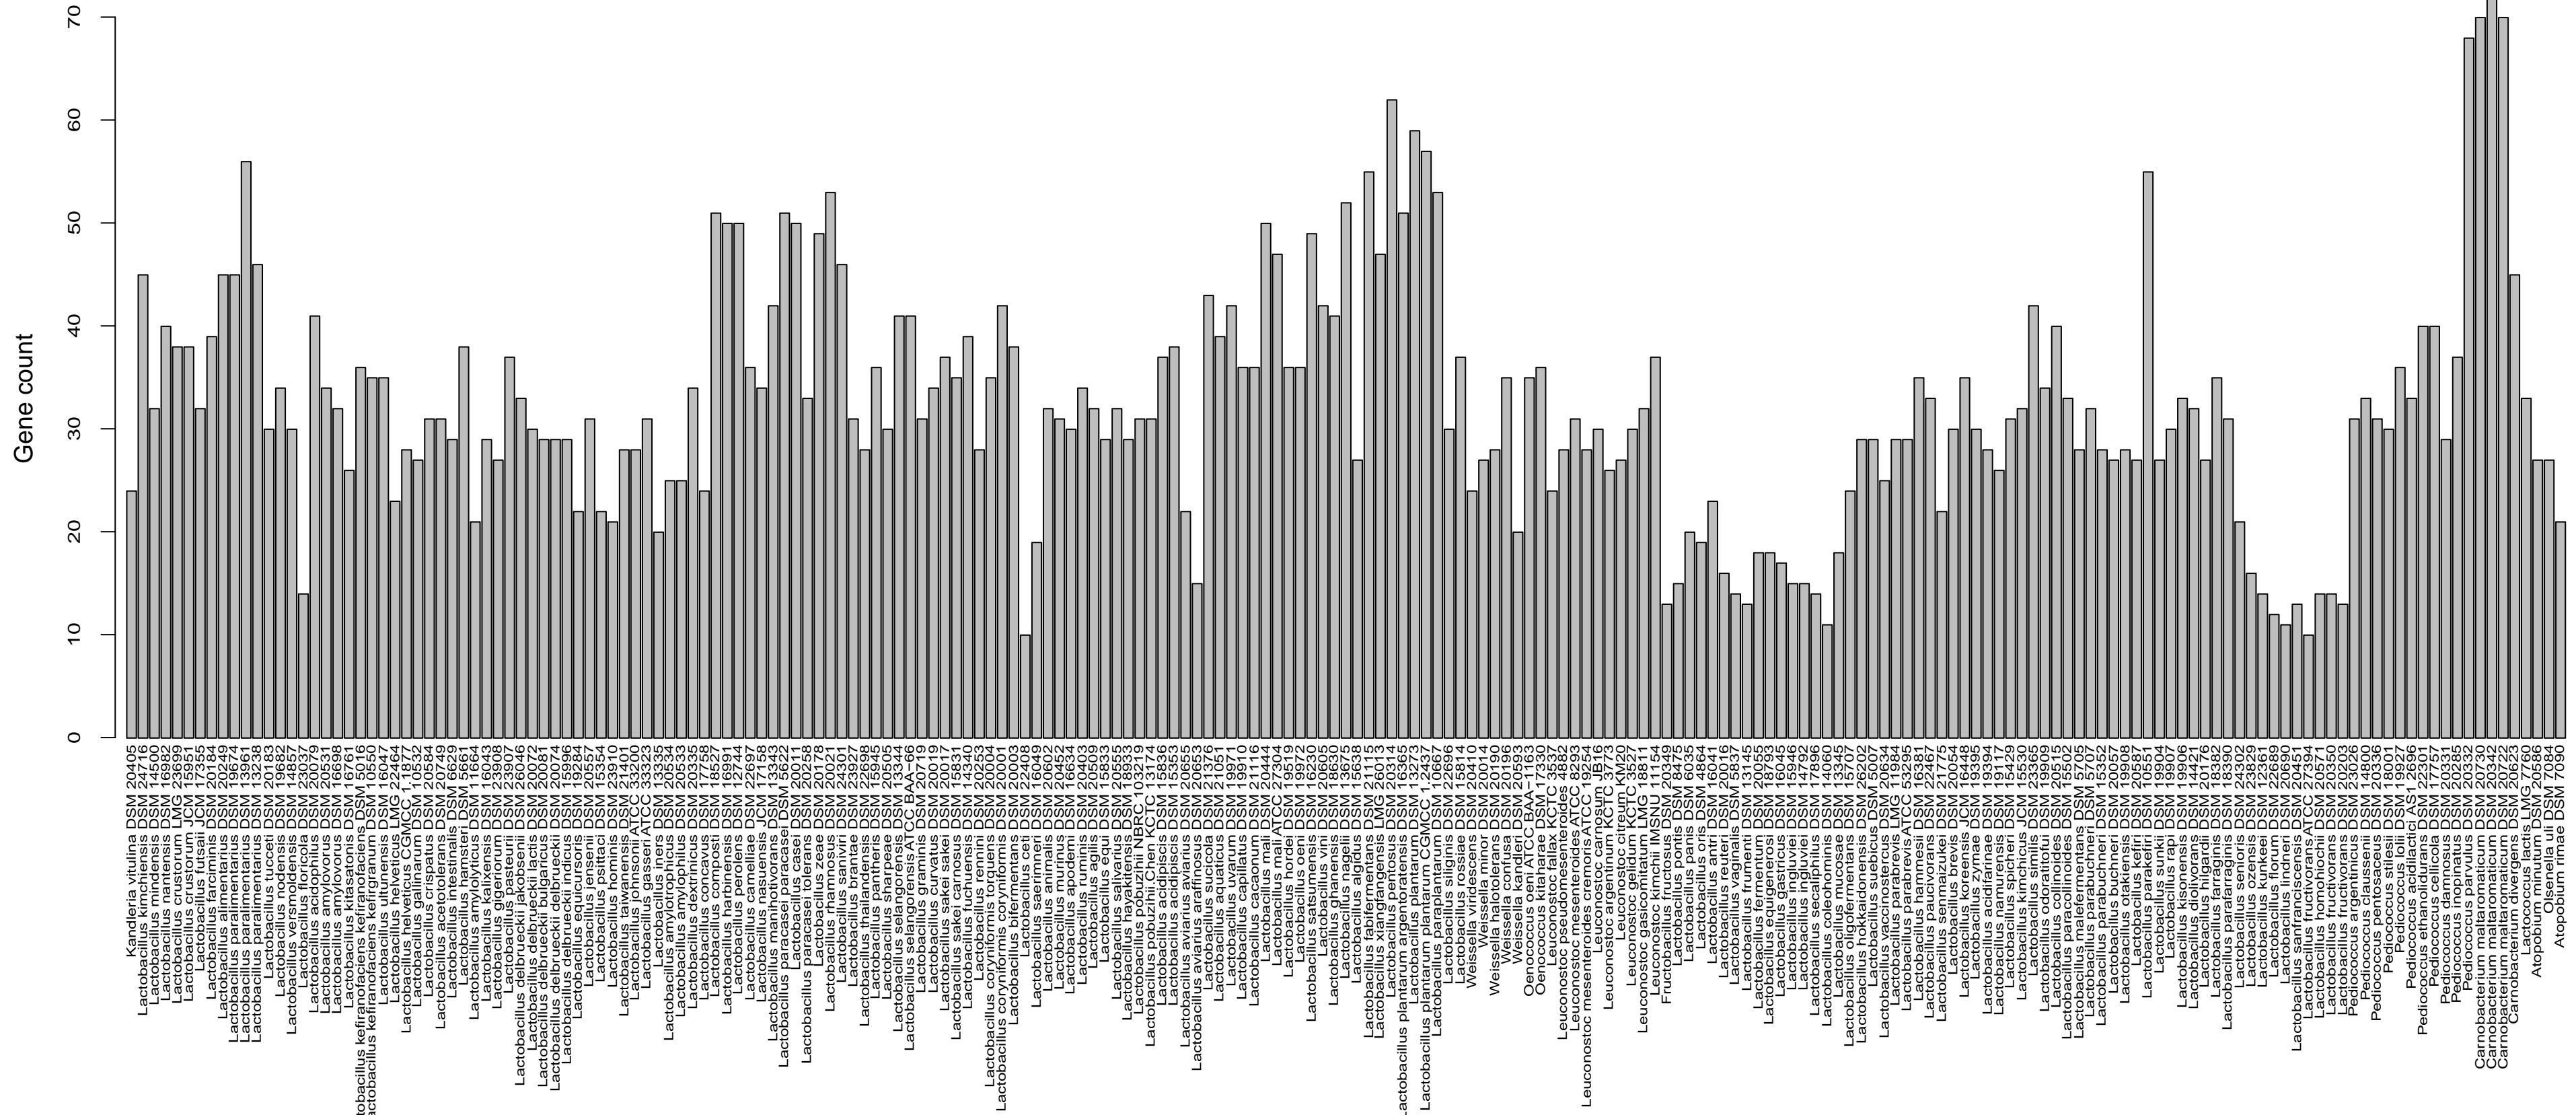

Supp. Figure 22. Barplot of the number of genes involved in carbohydrate transport for each strain. Strains are ordered according to the phylogenetic tree in Fig 2.

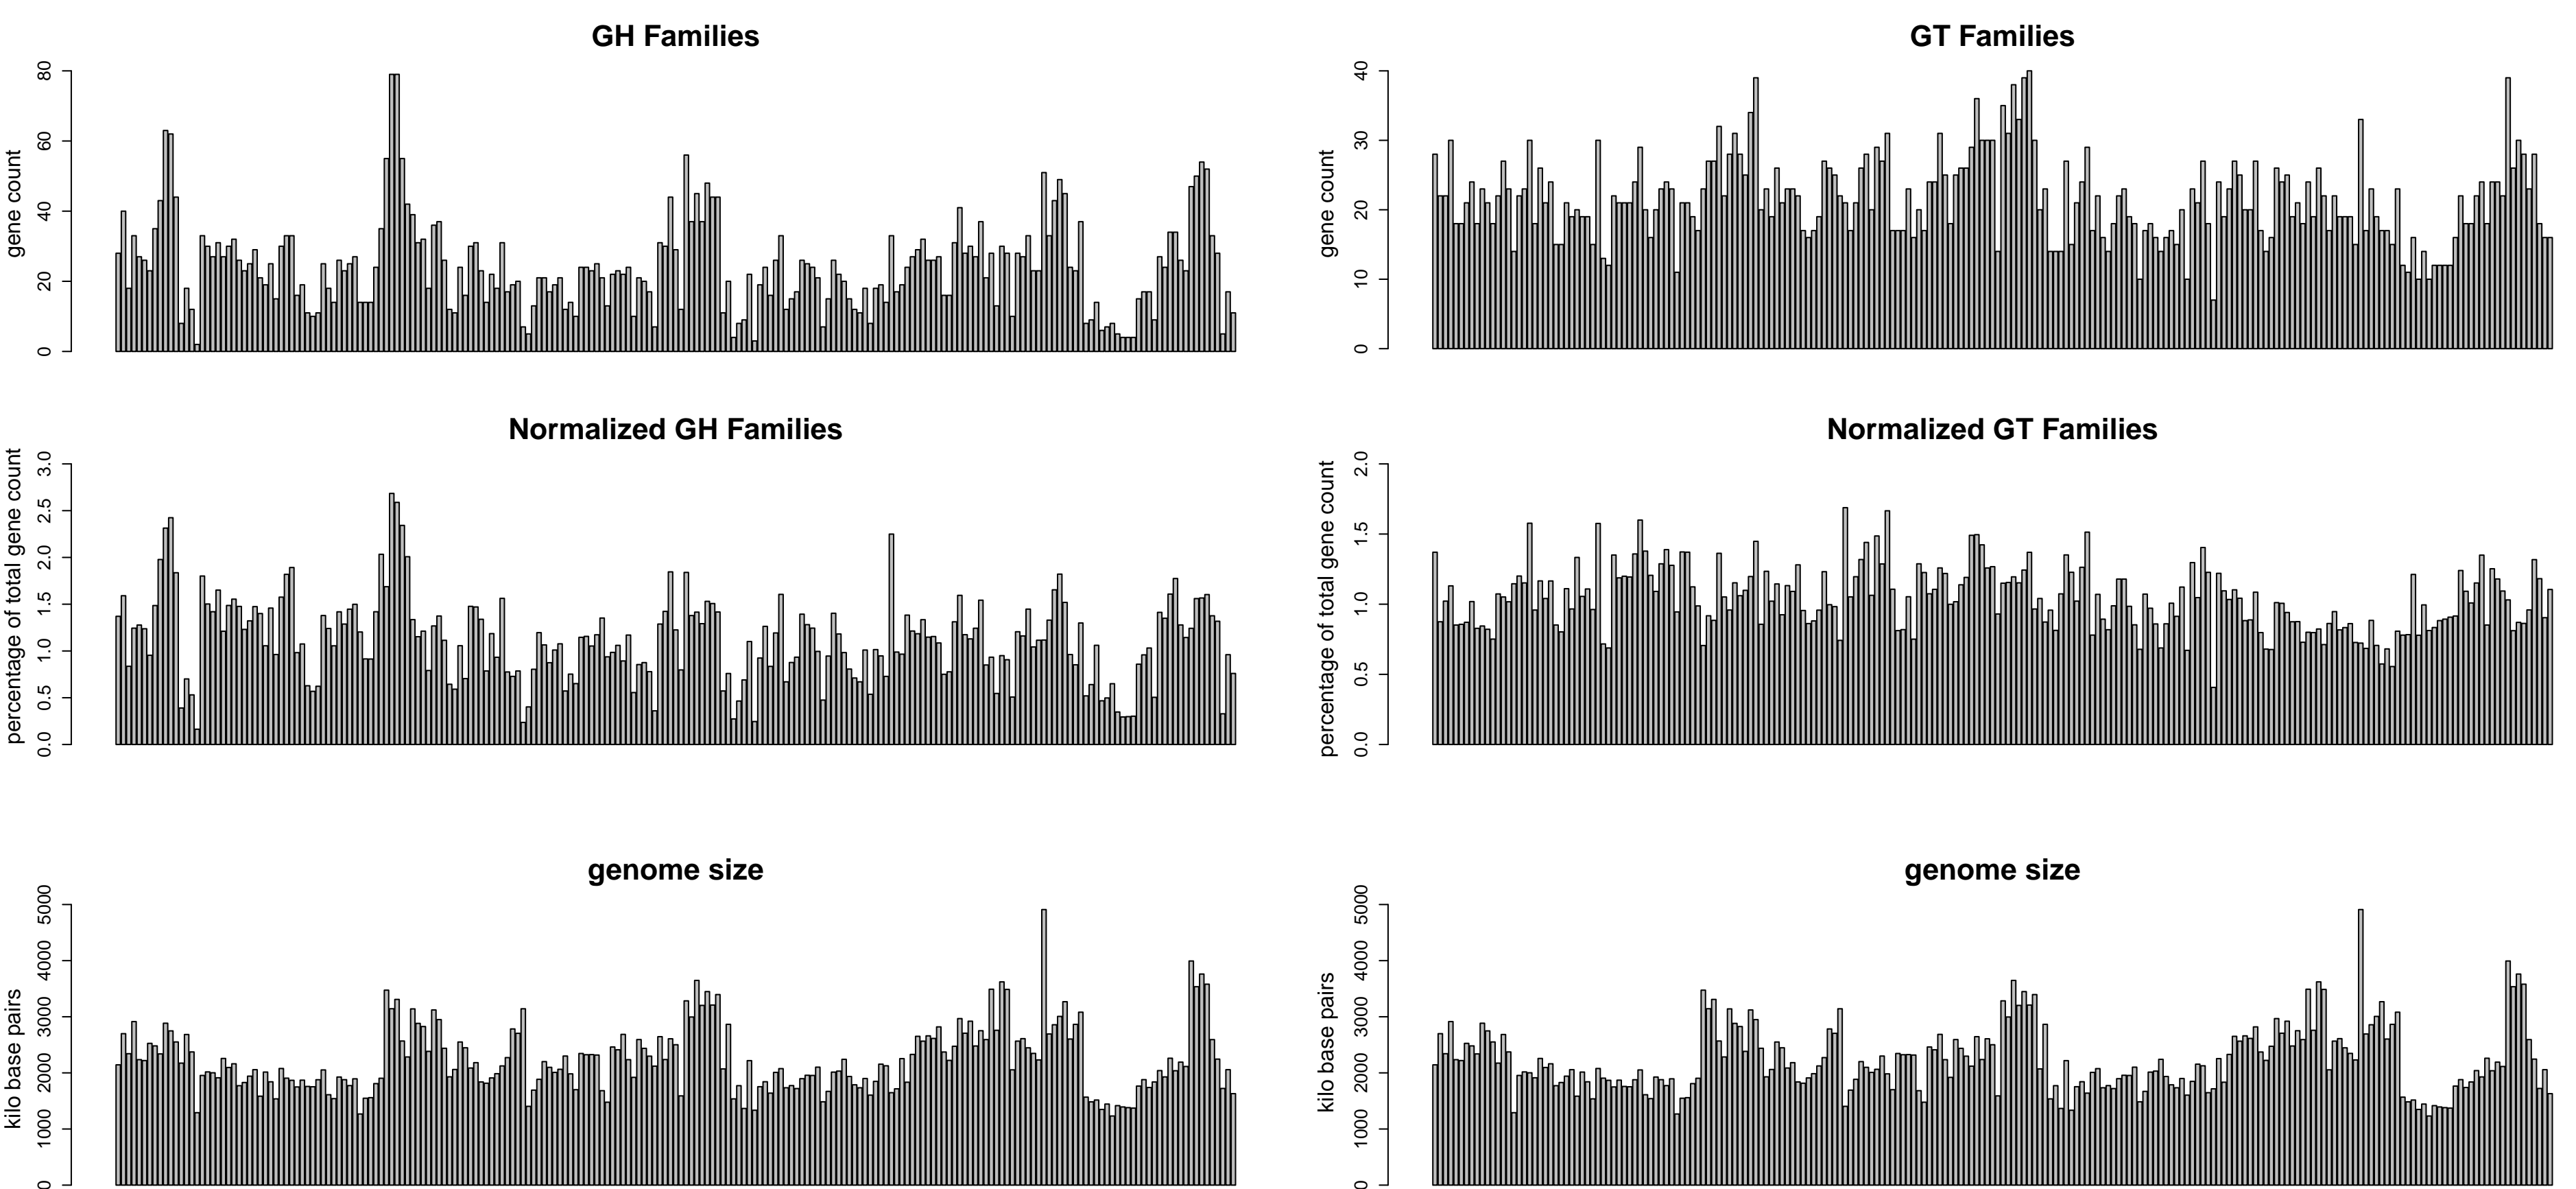

**Supp. Figure 23. The effect of normalizing counts of GHs and GTs by genome size.** The three bar-graphs on the left show, from top to bottom, GH gene counts, GH gene counts expressed as a percentage of the total gene count and genome size (in kbps). The equivalent for GTs is shown in the three bar-graphs on the right. Genome size is highly correlated with total number of genes per genome (Pearson; 0.99).

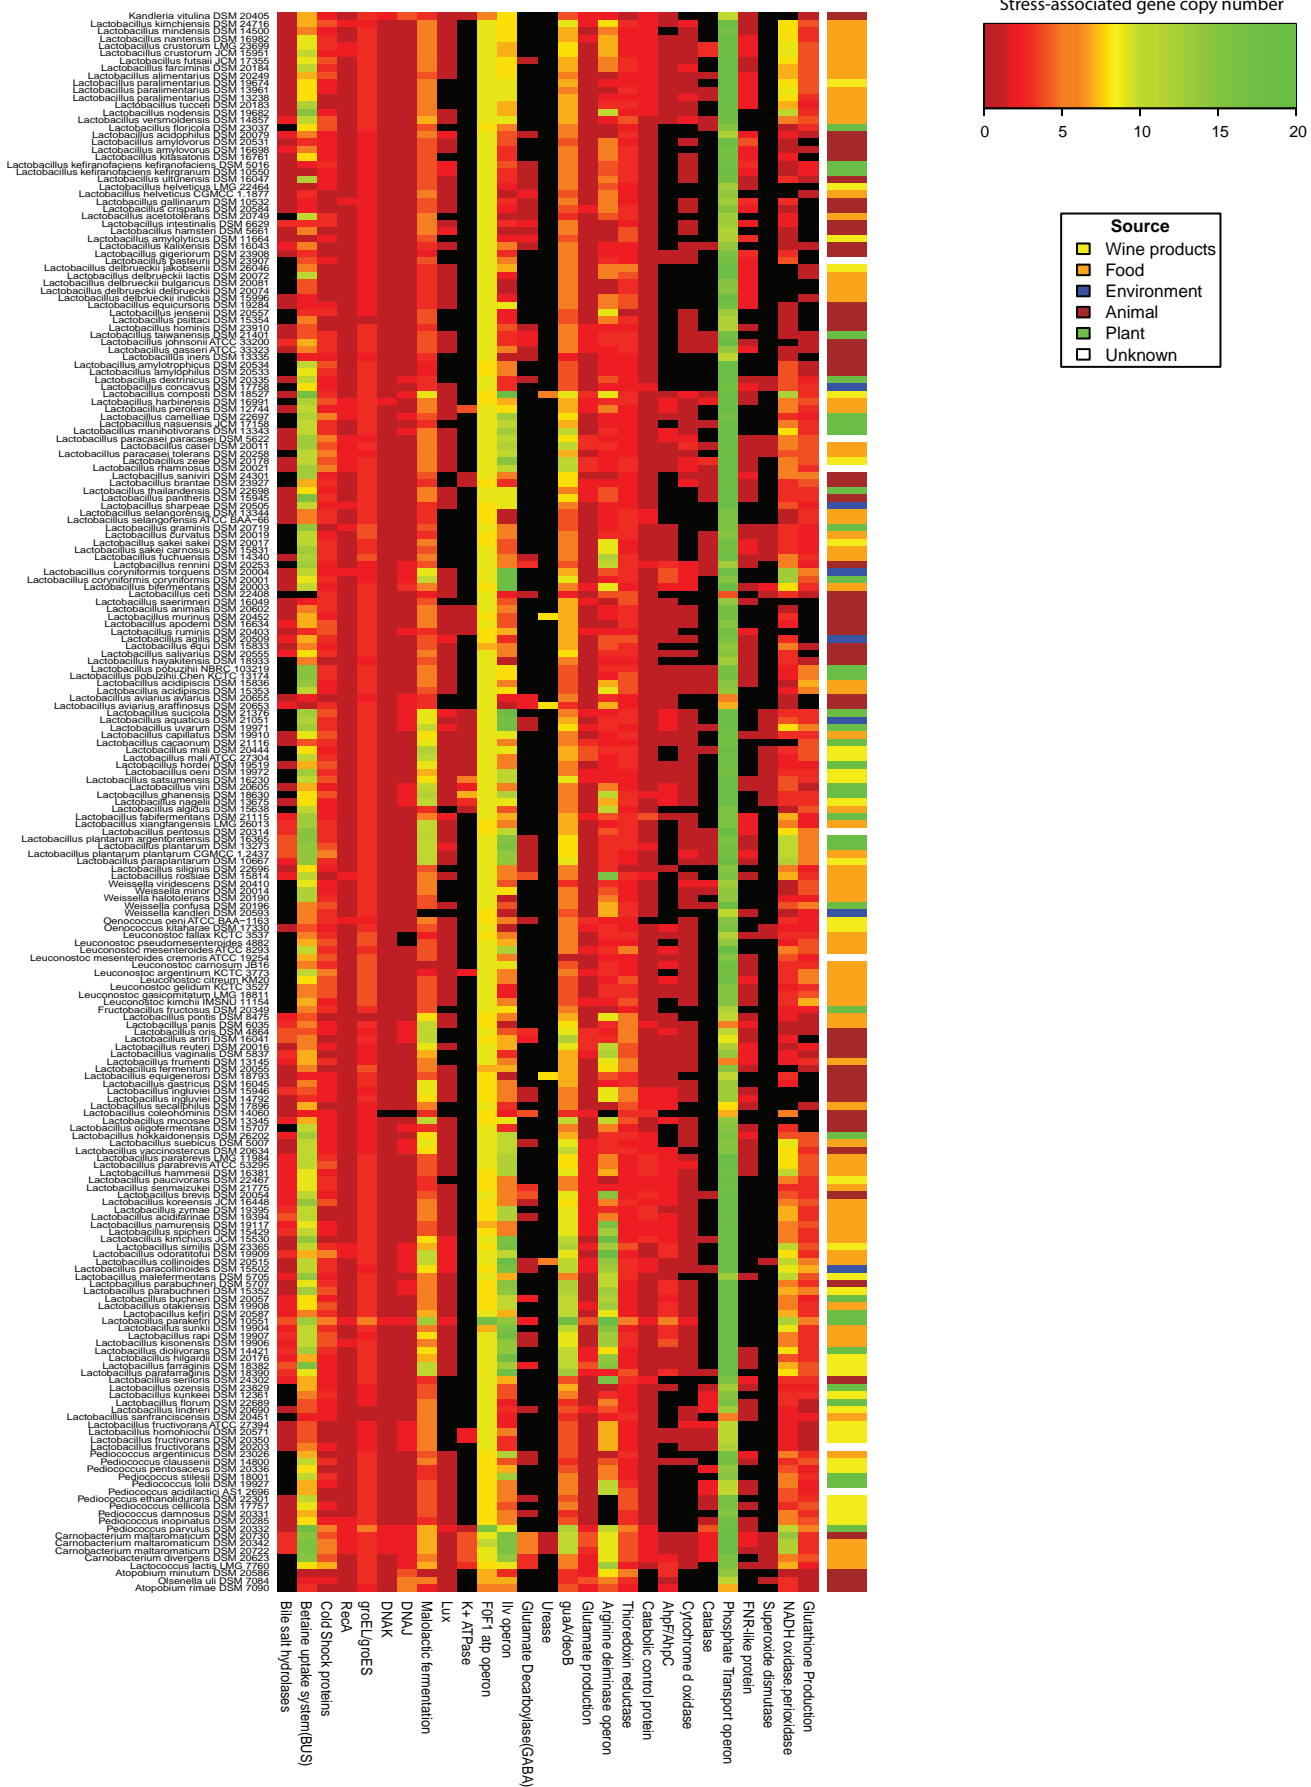

**Supp. Figure 24. Heatmap of the distribution and abundance of stress response genes across the *Lactobacillus* Genus Complex and associated genera.** Gene copy number for 27 stress-associated genes is indicated by the color key from black (absent) to green. Type of stress resistance is indicated by the names at the bottom of the figure. Strains are ordered from top to bottom as they appear top-down on the phylogeny (Fig. 2) with source information for each strain indicated by a color bar at the side of the heat-map.



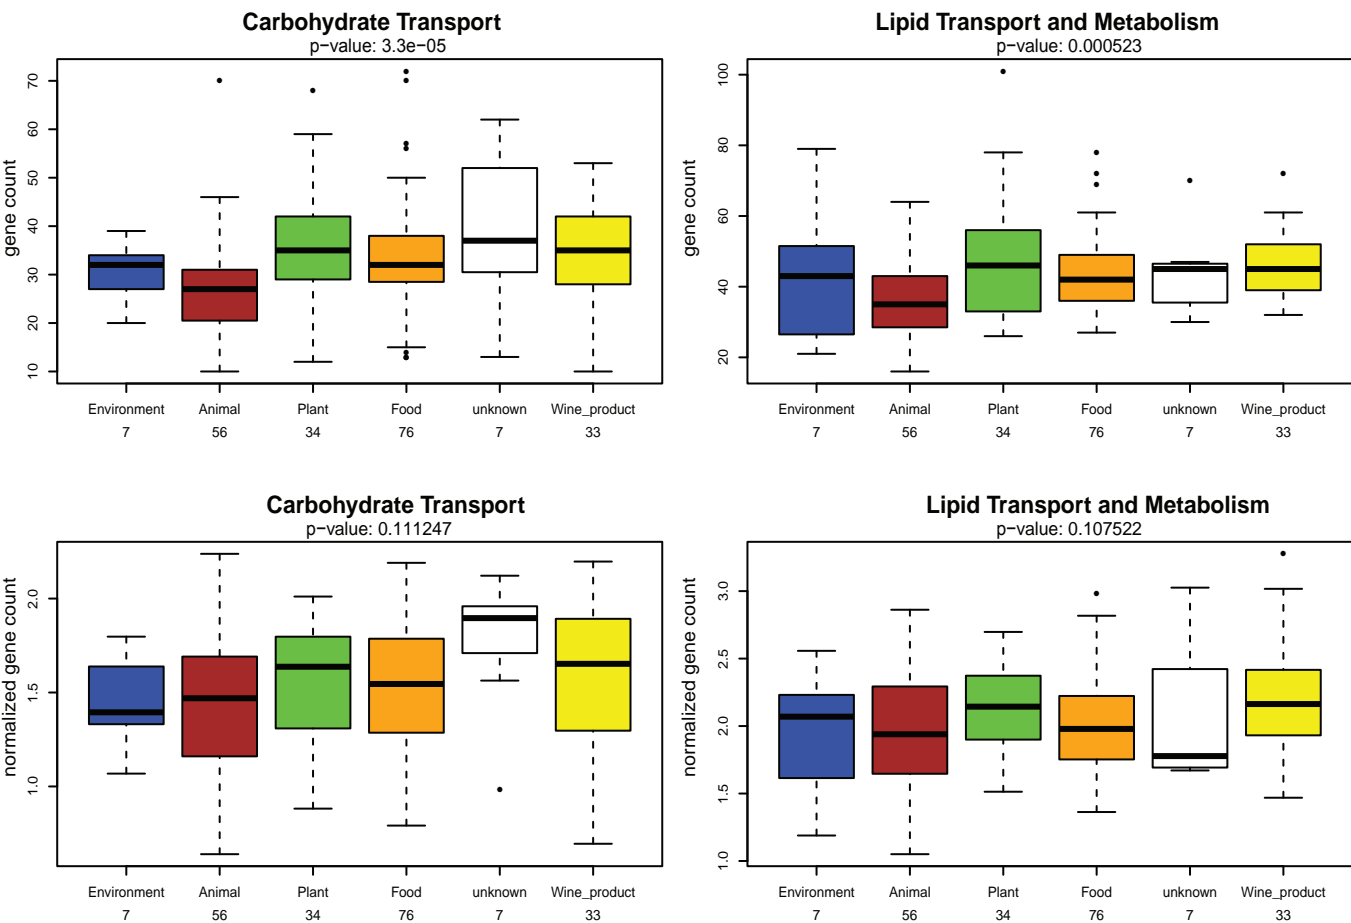

**Supp. Figure 25. Association of carbohydrate transport and lipid transport/metabolism with niche.** Top panels display raw gene counts and bottom panels display gene counts normalized by total genes. Boxplots represent a five-point summary of the data in the following order (from bottom to top): minimum, first quartile, median, third quartile and maximum. Outliers are represented as individual points above or below the boxplot.

# 1 **Supplementary Tables**

2 **Supp. Table 1. Species analysed and their genomic features.**

3 **Supp. Table 2. Sequence information for the 73 core complete genes.** The core genome  
4 was established based on genomes listed in Table 1. *Lactobacillus salivarius* genes are shown  
5 as exemplars for sequence retrieval. Columns are protein ID numbers, gene designation,  
6 locus tag, COG, annotation, co-ordinates in the *L. salivarius* UCC118 genome  
7 (NC\_007929.1), strand and gene length.

8 **Supp. Table 3. Genera used in building the tree of bacteria.**

9 **Supp. Table 4. Sixteen marker genes used to build the bacterial tree composed of 452**  
10 **genera and 213 *Lactobacillus* genomes and *Lactobacillus* associated genera.**

11 **Supp. Table 5. Distribution of LPXTG-containing and sortase enzymes across the 213**  
12 **genomes.**

13 **Supp. Table 6. Distribution and abundance of cell envelope proteases (CEPs) and**  
14 **associated anchoring domains and motifs.**

15 **Supp. Table 7. CRISPR occurrence and diversity.** CRISPR-Cas system type designation  
16 was determined by the presence of CRISPR repeats, spacers, the universal *cas1* gene, and  
17 the signature for each type, namely *cas3*, *cas9*, and *cas10*, for Type I, II, and III, respectively.  
18 A “Y” in the each of the gene columns designates that the gene was positioned next to the  
19 CRISPR locus. In instances where only a partial gene was annotated, the symbol “Y\*” is  
20 shown. An N indicates that no *cas* gene was found. The type of the CRISPR-Cas system is  
21 noted in the “Type” column. When multiple CRISPR loci of the same type were present in the  
22 same genome, the type was then designated with a differential letter demarking their order in  
23 identification. When *cas* genes could not be annotated, the CRISPR-Cas system type was  
24 labeled “undefined.” Strains that contained neither CRISPR repeats nor *cas* genes were  
25 labeled with the “N/A” designation. “DR length” corresponds to the number of nucleotides in  
26 the CRISPR direct repeat. The number of spacers was also determined for each repeat-  
27 spacer array.

28 **Supp. Table 8. Sequence information for the 27 core partial genes.**

29 **Supp. Table 9. Presence and absence of the complete pathways for production of the**  
30 **20 standard amino acids.** A = auxotrophic; P = prototrophic.

31 **Supp. Table 10. Presence of sirtuin homologs in the 213 genomes analyzed.**

32 **Supp. Table 11. Genomic regions related to bacteriocin production identified in the**  
33 **213 genomes.**

Table S1. Species analyzed and their genome features

| Species Name                                   | StrainID  | Isolation year | Source                                          | Genome Size (Mbp) | GC%   | Predicted ORF number | Sequencing depth | Contig number | Short-read Archive | Genome Accession | Niche category | Phylogroup*                |
|------------------------------------------------|-----------|----------------|-------------------------------------------------|-------------------|-------|----------------------|------------------|---------------|--------------------|------------------|----------------|----------------------------|
| Atopobium minimum                              | DSM-20586 | 1987           | Perineal abscess                                | 1.72              | 48.69 | 1595                 | 116.11           | 64            | ERR339734          | JQB00000000      | Animal         | Other                      |
| Atopobium rimosum                              | DSM-7900  | 1954           | Human gingival crevice                          | 1.63              | 49.26 | 1524                 | 122.70           | 9             | ICP00000000        | JQD00000000      | Animal         | L. salivarius              |
| Carnobacterium divergens                       | DSM-20623 | 1984           | Human packaged minced beef                      | 2.59              | 34.95 | 2451                 | 77.13            | 51            | ERR339727          | JQB00000000      | Food           | Carnobacterium             |
| Carnobacterium maltaromaticum                  | DSM-20342 | 1974           | Milk with malty flavour                         | 3.76              | 34.31 | 3369                 | 53.17            | 155           | ERR339700          | JQB00000000      | Food           | Carnobacterium             |
| Carnobacterium maltaromaticum                  | DSM-20722 | 1974           | Vacuum-packaged meat                            | 3.68              | 34.31 | 3541                 | 55.86            | 64            | ERR339702          | JQB00000000      | Food           | Carnobacterium             |
| Carnobacterium maltaromaticum                  | DSM-17370 | 1974           | Disseminated rainbow trout                      | 3.48              | 34.38 | 3389                 | 56.57            | 56            | ERR339703          | JQB00000000      | Food           | Carnobacterium             |
| Fructobacillus fructus                         | DSM-20349 | 1956           | Flowers                                         | 1.48              | 44.56 | 1514                 | 134.69           | 45            | ERR339711          | JQB00000000      | Plant          | Leu_Fru                    |
| Kandleria vinilina                             | DSM-20405 | 1973           | Calf rumen                                      | 2.14              | 35.03 | 2126                 | 93.31            | 138           | ERR339782          | JQB00000000      | Animal         | Other                      |
| Lactobacillus acidoterans                      | DSM-20749 | 1986           | Fermented Vinegar Broth                         | 1.59              | 36.26 | 1531                 | 151.41           | 123           | ERR339757          | AYZ00000000      | Food           | L. salivarius              |
| Lactobacillus acidoterans                      | DSM-19394 | 2001           | Artisanal wheat sourdough                       | 2.92              | 51.59 | 2735                 | 47.57            | 47            | AZD00000000        | AZD00000000      | Food           | L. salivarius              |
| Lactobacillus acidoterans                      | DSM-15353 | 2001           | Artisanal wheat sourdough                       | 2.32              | 39.06 | 2280                 | 86.27            | 298           | ERR339738          | JQB00000000      | Food           | L. salivarius              |
| Lactobacillus acidophilus                      | DSM-15836 | 2000           | Fermented fish                                  | 2.33              | 39.07 | 2307                 | 51.59            | 457           | SRX456282          | AZF00000000      | Food           | L. salivarius              |
| Lactobacillus agilis                           | DSM-20079 | 1900           | Human                                           | 1.95              | 34.59 | 1886                 | 61.41            | 30            | SRX456246          | AZC00000000      | Animal         | L. delbrueckii             |
| Lactobacillus agilis                           | DSM-20079 | 1900           | Municipal sewage                                | 1.74              | 34.04 | 1744                 | 102.27           | 115           | AYY00000000        | AYY00000000      | Environment    | L. salivarius              |
| Lactobacillus algalis                          | DSM-15638 | 2000           | Vacuum-packed beef                              | 1.59              | 36.03 | 1535                 | 150.91           | 28            | SRX456283          | AZD00000000      | Food           | L. salivarius              |
| Lactobacillus alimentarius                     | DSM-20249 | 1970           | Marinated fish product                          | 2.34              | 33.4  | 2223                 | 102.65           | 58            | ERR339701          | AZD00000000      | Food           | L. alimentarius            |
| Lactobacillus amylophilus                      | DSM-11664 | 1999           | Acidified beer wort                             | 1.54              | 38.24 | 1628                 | 78.05            | 98            | SRX456357          | AZEF00000000     | Wine product   | L. delbrueckii             |
| Lactobacillus amylophilus                      | DSM-20533 | 1981           | Swine waste-corn fermentation                   | 1.92              | 41.48 | 1910                 | 124.56           | 112           | ERR339717          | AYY00000000      | Animal         | Couple1                    |
| Lactobacillus amylophilus                      | DSM-20534 | 2006           | Swine waste-corn fermentation                   | 1.55              | 43.59 | 1589                 | 154.98           | 21            | SRX456279          | AZC00000000      | Animal         | Couple1                    |
| Lactobacillus amylovorus                       | DSM-16698 | 1981           | Faeces, piglet intestine                        | 2.00              | 37.82 | 2004                 | 99.92            | 162           | ERR339733          | JQB00000000      | Animal         | L. delbrueckii             |
| Lactobacillus amylovorus                       | DSM-20531 | 1981           | Cattle waste-corn fermentation                  | 2.02              | 37.77 | 2061                 | 59.48            | 116           | SRX456280          | AZC00000000      | Animal         | L. delbrueckii             |
| Lactobacillus animalis                         | DSM-20602 | 1983           | Dental plaque of baboon                         | 1.89              | 41.06 | 1813                 | 127.29           | 93            | ERR339783          | AYY00000000      | Animal         | L. salivarius              |
| Lactobacillus animalis                         | DSM-16641 | 2005           | Gastric biopsies, Human stomach mucosa          | 2.24              | 51.11 | 2124                 | 53.53            | 92            | SRX456248          | AZD00000000      | Animal         | L. reuteri, L. vaccinosus  |
| Lactobacillus apodemus                         | DSM-11634 | 2006           | Faeces of wild Japanese wood mouse              | 2.10              | 38.63 | 2009                 | 114.35           | 109           | ERR339737          | AZD00000000      | Animal         | L. salivarius              |
| Lactobacillus aquilinus                        | DSM-21051 | 2009           | Surface of eutrophic freshwater pond            | 3.71              | 41.41 | 3279                 | 99.53            | 61            | ERR339743          | AZD00000000      | Environment    | L. salivarius              |
| Lactobacillus avarius subsp. avarius           | DSM-20653 | 1986           | Intestine of chicken                            | 1.48              | 38.13 | 1429                 | 162.40           | 49            | ERR405609          | AYZ00000000      | Animal         | L. salivarius              |
| Lactobacillus avarius subsp. avarius           | DSM-20655 | 1985           | Faeces of chicken                               | 1.68              | 40.12 | 1591                 | 142.61           | 41            | ERR339760          | AYZ00000000      | Animal         | L. salivarius              |
| Lactobacillus bifermans                        | DSM-20003 | 1945           | Brown cheese                                    | 3.14              | 44.29 | 3088                 | 76.38            | 205           | ERR339761          | AZD00000000      | Food           | L. reuteri, L. salivarius  |
| Lactobacillus brevis                           | DSM-29227 | 1982           | Faeces of Canada goose                          | 2.17              | 45.48 | 2010                 | 124.56           | 112           | AYY00000000        | AYY00000000      | Animal         | L. manihotivorus, L. casei |
| Lactobacillus brevis                           | DSM-20554 | 1919           | Faeces                                          | 2.47              | 45.96 | 2425                 | 48.50            | 11            | SRX456278          | AZCP00000000     | Animal         | L. brevis, L. collinoides  |
| Lactobacillus buchneri                         | DSM-20057 | 1903           | Tomato pulp                                     | 2.45              | 44.41 | 2349                 | 49.05            | 90            | SRX456296          | AZD00000000      | Plant          | L. buchneri                |
| Lactobacillus buchneri                         | DSM-21116 | 2009           | Cocoa bean heap fermentation                    | 1.92              | 33.87 | 1833                 | 124.98           | 25            | ERR339739          | AZD00000000      | Food           | L. salivarius              |
| Lactobacillus buchneri                         | DSM-22697 | 2007           | Fermented tea leaves (niang)                    | 2.57              | 45.39 | 2430                 | 93.46            | 144           | AYY00000000        | AYY00000000      | Food           | L. manihotivorus, L. casei |
| Lactobacillus capillatus                       | DSM-19910 | 2008           | Fermented brine used for stinky tofu production | 2.24              | 37.63 | 2113                 | 107.36           | 79            | ERR339689          | AZEF00000000     | Food           | L. salivarius              |
| Lactobacillus casei                            | DSM-20011 | 1916           | Cheese                                          | 2.83              | 46.45 | 2817                 | 42.46            | 140           | SRX456230          | AZC00000000      | Food           | L. manihotivorus, L. casei |
| Lactobacillus casei                            | DSM-22408 | 2008           | Lungs of a beaked whale                         | 1.40              | 33.73 | 1258                 | 142.46           | 69            | ERR339740          | JQB00000000      | Animal         | L. salivarius              |
| Lactobacillus celastromis                      | DSM-14060 | 1981           | Human vagina                                    | 2.02              | 40.81 | 1982                 | 108.62           | 94            | ERR339741          | AZD00000000      | Animal         | L. salivarius              |
| Lactobacillus celastromis                      | DSM-20515 | 1972           | Fermenting apple juice                          | 3.62              | 46.11 | 3380                 | 66.27            | 165           | ERR339741          | AYY00000000      | Food           | L. brevis, L. collinoides  |
| Lactobacillus compositus                       | DSM-18227 | 2007           | Composting material of distilled sochu residue  | 3.47              | 43.95 | 3370                 | 48.57            | 131           | ERR339694          | AZD00000000      | Wine product   | L. perolens                |
| Lactobacillus compositus                       | DSM-17378 | 2009           | Walks of a distilled spirit fermenting chile    | 1.90              | 43.3  | 1852                 | 85.63            | 141           | ERR339742          | AZD00000000      | Environment    | Couple2                    |
| Lactobacillus coryniformis subsp. coryniformis | DSM-20001 | 1965           | Silage                                          | 2.42              | 42.86 | 2623                 | 44.36            | 198           | SRX456340          | AZC00000000      | Animal         | L. coryniformis            |
| Lactobacillus coryniformis subsp. torques      | DSM-20004 | 1965           | Air of cow shed                                 | 2.78              | 42.99 | 2699                 | 43.11            | 410           | SRX456233          | AZC00000000      | Environment    | L. coryniformis            |
| Lactobacillus crispatus                        | DSM-20584 | 1955           | Eye                                             | 2.06              | 36.59 | 2038                 | 58.34            | 150           | SRX456245          | AZC00000000      | Animal         | L. delbrueckii             |
| Lactobacillus crustorum                        | JCM-15951 | 2007           | Wheat sourdough                                 | 1.95              | 41.55 | 2150                 | 54.07            | 101           | SRX456344          | AZD00000000      | Food           | L. alimentarius            |
| Lactobacillus crustorum                        | LMG-23699 | 2007           | Wheat sourdough                                 | 2.24              | 34.99 | 2206                 | 89.46            | 87            | ERR339721          | IQCK00000000     | Food           | L. alimentarius            |
| Lactobacillus curvatus                         | DSM-20019 | 1903           | Milk                                            | 1.82              | 41.97 | 1819                 | 66.09            | 250           | SRX456225          | AZD00000000      | Food           | L. sakei                   |
| Lactobacillus delbrueckii subsp. bulgaricus    | DSM-20081 | 1919           | Bulgarian yoghurt                               | 1.76              | 49.91 | 1707                 | 113.73           | 80            | ERR339756          | QJAV00000000     | Food           | L. delbrueckii             |
| Lactobacillus delbrueckii subsp. delbrueckii   | DSM-20081 | 1919           | Sour grain mash                                 | 1.76              | 49.91 | 1707                 | 113.73           | 80            | ERR339756          | QJAV00000000     | Food           | L. delbrueckii             |
| Lactobacillus delbrueckii subsp. indicus       | DSM-15996 | 2005           | Traditional dairy fermented product (Dahi type) | 1.88              | 45.54 | 1884                 | 126.93           | 69            | AZD00000000        | AZD00000000      | Food           | L. delbrueckii             |
| Lactobacillus delbrueckii subsp. jacobsonii    | DSM-20646 | 2013           | Dolo wort (Alcoholic fermented beverage)        | 1.75              | 50.31 | 1715                 | 102.89           | 135           | SRX690302          | JQCC00000000     | Wine product   | L. delbrueckii             |
| Lactobacillus delbrueckii subsp. lactis        | DSM-20072 | 1919           | Emmental cheese                                 | 1.87              | 49.86 | 1842                 | 61.26            | 223           | ERR339627          | AZD00000000      | Food           | L. delbrueckii             |
| Lactobacillus delbrueckii subsp. lactis        | DSM-20072 | 1919           | Emmental cheese                                 | 1.87              | 49.86 | 1842                 | 61.26            | 223           | ERR339627          | AZD00000000      | Food           | L. delbrueckii             |
| Lactobacillus delbrueckii subsp. lactis        | DSM-20072 | 1919           | Emmental cheese                                 | 1.87              | 49.86 | 1842                 | 61.26            | 223           | ERR339627          | AZD00000000      | Food           | L. delbrueckii             |
| Lactobacillus delbrueckii subsp. lactis        | DSM-20072 | 1919           | Emmental cheese                                 | 1.87              | 49.86 | 1842                 | 61.26            | 223           | ERR339627          | AZD00000000      | Food           | L. delbrueckii             |
| Lactobacillus delbrueckii subsp. lactis        | DSM-20072 | 1919           | Emmental cheese                                 | 1.87              | 49.86 | 1842                 | 61.26            | 223           | ERR339627          | AZD00000000      | Food           | L. delbrueckii             |
| Lactobacillus delbrueckii subsp. lactis        | DSM-20072 | 1919           | Emmental cheese                                 | 1.87              | 49.86 | 1842                 | 61.26            | 223           | ERR339627          | AZD00000000      | Food           | L. delbrueckii             |
| Lactobacillus delbrueckii subsp. lactis        | DSM-20072 | 1919           | Emmental cheese                                 | 1.87              | 49.86 | 1842                 | 61.26            | 223           | ERR339627          | AZD00000000      | Food           | L. delbrueckii             |
| Lactobacillus delbrueckii subsp. lactis        | DSM-20072 | 1919           | Emmental cheese                                 | 1.87              | 49.86 | 1842                 | 61.26            | 223           | ERR339627          | AZD00000000      | Food           | L. delbrueckii             |
| Lactobacillus delbrueckii subsp. lactis        | DSM-20072 | 1919           | Emmental cheese                                 | 1.87              | 49.86 | 1842                 | 61.26            | 223           | ERR339627          | AZD00000000      | Food           | L. delbrueckii             |
| Lactobacillus delbrueckii subsp. lactis        | DSM-20072 | 1919           | Emmental cheese                                 | 1.87              | 49.86 | 1842                 | 61.26            | 223           | ERR339627          | AZD00000000      | Food           | L. delbrueckii             |
| Lactobacillus delbrueckii subsp. lactis        | DSM-20072 | 1919           | Emmental cheese                                 | 1.87              | 49.86 | 1842                 | 61.26            | 223           | ERR339627          | AZD00000000      | Food           | L. delbrueckii             |
| Lactobacillus delbrueckii subsp. lactis        | DSM-20072 | 1919           | Emmental cheese                                 | 1.87              | 49.86 | 1842                 | 61.26            | 223           | ERR339627          | AZD00000000      | Food           | L. delbrueckii             |
| Lactobacillus delbrueckii subsp. lactis        | DSM-20072 | 1919           | Emmental cheese                                 | 1.87              | 49.86 | 1842                 | 61.26            | 223           | ERR339627          | AZD00000000      | Food           | L. delbrueckii             |
| Lactobacillus delbrueckii subsp. lactis        | DSM-20072 | 1919           | Emmental cheese                                 | 1.87              | 49.86 | 1842                 | 61.26            | 223           | ERR339627          | AZD00000000      | Food           | L. delbrueckii             |
| Lactobacillus delbrueckii subsp. lactis        | DSM-20072 | 1919           | Emmental cheese                                 | 1.87              | 49.86 | 1842                 | 61.26            | 223           | ERR339627          | AZD00000000      | Food           | L. delbrueckii             |
| Lactobacillus delbrueckii subsp. lactis        | DSM-20072 | 1919           | Emmental cheese                                 | 1.87              | 49.86 | 1842                 | 61.26            | 223           | ERR339627          | AZD00000000      | Food           | L. delbrueckii             |
| Lactobacillus delbrueckii subsp. lactis        | DSM-20072 | 1919           | Emmental cheese                                 | 1.87              | 49.86 | 1842                 | 61.26            | 223           | ERR339627          | AZD00000000      | Food           | L. delbrueckii             |
| Lactobacillus delbrueckii subsp. lactis        | DSM-20072 | 1919           | Emmental cheese                                 | 1.87              | 49.86 | 1842                 | 61.26            | 223           | ERR339627          | AZD00000000      | Food           | L. delbrueckii             |
| Lactobacillus delbrueckii subsp. lactis        | DSM-20072 | 1919           | Emmental cheese                                 | 1.87              | 49.86 | 1842                 | 61.26            | 223           | ERR339627          | AZD00000000      | Food           | L. delbrueckii             |
| Lactobacillus delbrueckii subsp. lactis        | DSM-20072 | 1919           | Emmental cheese                                 | 1.87              | 49.86 | 1842                 | 61.26            | 223           | ERR339627          | AZD00000000      | Food           | L. delbrueckii             |
| Lactobacillus delbrueckii subsp. lactis        | DSM-20072 | 1919           | Emmental cheese                                 | 1.87              | 49.86 | 1842                 | 61.26            | 223           | ERR339627          | AZD00000000      | Food           | L. delbrueckii             |
| Lactobacillus delbrueckii subsp. lactis        | DSM-20072 | 1919           | Emmental cheese                                 | 1.87              | 49.86 | 1842                 | 61.26            | 223           | ERR339627          | AZD00000000      | Food           | L. delbrueckii             |
| Lactobacillus delbrueckii subsp. lactis        | DSM-20072 | 1919           | Emmental cheese                                 | 1.87              | 49.86 | 1842                 | 61.26            | 223           | ERR339627          | AZD00000000      | Food           | L. delbrueckii             |
| Lactobacillus delbrueckii subsp. lactis        | DSM-20072 | 1919           | Emmental cheese                                 | 1.87              | 49.86 | 1842                 | 61.26            | 223           | ERR339627          | AZD00000000      | Food           | L. delbrueckii             |
| Lactobacillus delbrueckii subsp. lactis        | DSM-20072 | 1919           | Emmental cheese                                 | 1.87              | 49.86 | 1842                 | 61.26            | 223           | ERR339627          | AZD00000000      | Food           | L. delbrueckii             |
| Lactobacillus delbrueckii subsp. lactis        | DSM-20072 | 1919           | Emmental cheese                                 | 1.87              | 49.86 | 1842                 | 61.26            | 223           | ERR339627          | AZD00000000      | Food           | L. delbrueckii             |
| Lactobacillus delbrueckii subsp. lactis        | DSM-20072 | 1919           | Emmental cheese                                 | 1.87              | 49.86 | 1842                 | 61.26            | 223           | ERR339627          | AZD00000000      | Food           | L. delbrueckii             |
| Lactobacillus delbrueckii subsp. lactis        | DSM-20072 | 1919           | Emmental cheese                                 | 1.87              | 49.86 | 1842                 | 61.26            | 223           | ERR339627          | AZD00000000      | Food           | L. delbrueckii             |
| Lactobacillus delbrueckii subsp. lactis        | DSM-20072 | 1919           | Emmental cheese                                 | 1.87              | 49.86 | 1842                 | 61.26            | 223           | ERR339627          | AZD00000000      | Food           | L. delbrueckii             |
| Lactobacillus delbrueckii subsp. lactis        | DSM-20072 | 1919           | Emmental cheese                                 | 1.87              | 49.86 | 1842                 | 61.26            | 223           | ERR339627          | AZD00000000      | Food           | L. delbrueckii             |
| Lactobacillus delbrueckii subsp. lactis        | DSM-20072 | 1919           | Emmental cheese                                 | 1.87              | 49.86 | 1842                 | 61.26            | 223           | ERR339627          | AZD00000000      | Food           | L. delbrueckii             |
| Lactobacillus delbrueckii subsp. lactis        | DSM-20072 | 1919           | Emmental cheese                                 | 1.87              | 49.86 | 1842                 | 61.26            | 223           | ERR339627          | AZD00000000      | Food           | L. delbrueckii             |
| Lactobacillus delbrueckii subsp. lactis        | DSM-20072 | 1919           | Emmental cheese                                 | 1.87              | 49.86 | 1842                 | 61.26            | 223           | ERR339627          | AZD00000000      | Food           | L. delbrueckii             |
| Lactobacillus delbrueckii subsp. lactis        | DSM-20072 | 1919           | Emmental cheese                                 | 1.87              | 49.86 | 1842                 | 61.26            | 223           | ERR339627          | AZD00000000      | Food           | L. delbrueckii             |
| Lactobacillus delbrueckii subsp. lactis        | DSM-20072 | 1919           | Emmental cheese                                 | 1.87              | 49.86 | 1842                 | 61.26            | 223           | ERR339627          | AZD00000000      | Food           | L. delbrueckii             |
| Lactobacillus delbrueckii subsp. lactis        | DSM-20072 | 1919           | Emmental cheese                                 | 1.87              | 49.86 | 1842                 | 61.26            | 223           | ERR339627          | AZD00000000      | Food           | L. delbrueckii             |
| Lactobacillus delbrueckii subsp. lactis        |           |                |                                                 |                   |       |                      |                  |               |                    |                  |                |                            |

|                                    |               |      |                                                |      |       |      |        |     |           |                   |              |                                |
|------------------------------------|---------------|------|------------------------------------------------|------|-------|------|--------|-----|-----------|-------------------|--------------|--------------------------------|
| Lactobacillus selangorensis        | DSM-13344     | 2000 | Chili bo                                       | 2.09 | 46.45 | 2082 | 95.83  | 32  | SRX690300 | QJAZ0000000       | Food         | L. sakei                       |
| Lactobacillus sensoris             | DSM-24302     | 2012 | Faeces of a healthy 100-year-old Japanese fema | 1.57 | 39.09 | 1567 | 153.08 | 16  | ERX359768 | AYZR0000000       | Animal       | L. buchneri                    |
| Lactobacillus semmarinckei         | DSM-21775     | 2008 | Semmarincke, a Japanese pickle                 | 2.22 | 48.04 | 1419 | 107.86 | 68  | SRX456331 | AYZH0000000       | Food         | L. brevis, L. collinoides      |
| Lactobacillus sharaeae             | DSM-20505     | 1982 | Municipal sewage                               | 2.45 | 53.38 | 2371 | 98.06  | 79  | ERX359770 | AYYO0000000       | Environment  | L. manihotivorum, L. casei     |
| Lactobacillus siliginis            | DSM-22696     | 2006 | Wheat sourdough                                | 2.07 | 44.08 | 2059 | 96.60  | 52  | ERX359771 | QJCB0000000       | Food         | Couple3                        |
| Lactobacillus similis              | DSM-23365     | 2010 | Fermented cane molasses at alcohol plants      | 3.49 | 46.99 | 3206 | 68.75  | 282 | ERX359772 | AYZM0000000       | Wine product | L. brevis, L. collinoides      |
| Lactobacillus spicheri             | DSM-15429     | 2004 | Rice sourdough                                 | 2.75 | 55.91 | 2494 | 87.23  | 51  | ERX359773 | AZFC0000000       | Food         | L. brevis, L. collinoides      |
| Lactobacillus sacicola             | DSM-21376     | 2009 | Sap of an Oak tree                             | 2.46 | 38.48 | 2335 | 97.51  | 31  | ERX450947 | AYZF0000000       | Plant        | L. salivarius                  |
| Lactobacillus saebicus             | DSM-5007      | 1989 | Apple mash                                     | 2.65 | 38.98 | 2517 | 45.26  | 81  | SRX456334 | AZGF0000000       | Food         | L. reuteri, L. vacciniostercus |
| Lactobacillus sunki                | DSM-19904     | 2009 | Sunki, a Japanese traditional pickle           | 2.69 | 42.06 | 2574 | 89.12  | 79  | SRX456335 | AZEA0000000       | Food         | L. buchneri                    |
| Lactobacillus taiwanensis          | DSM-21401     | 2009 | Silage cattle feed                             | 1.88 | 33.97 | 1851 | 127.73 | 93  | ERX359776 | AYZG0000000       | Plant        | L. delbrueckii                 |
| Lactobacillus thailandensis        | DSM-22698     | 2007 | Fermented tea leaves (miang)                   | 2.06 | 53.5  | 1943 | 116.47 | 23  | SRX456337 | AYZK0000000       | Plant        | L. manihotivorum, L. casei     |
| Lactobacillus tucceti              | DSM-20183     | 2009 | Sausage                                        | 2.17 | 34.07 | 2093 | 110.40 | 51  | ERX359779 | AZDG0000000       | Food         | L. alimentarius                |
| Lactobacillus ulmensis             | DSM-16047     | 2005 | Gastric biopsies, Human stomach mucosa         | 2.16 | 35.95 | 2113 | 55.51  | 105 | SRX456274 | AZFO0000000       | Animal       | L. delbrueckii                 |
| Lactobacillus uvorum               | DSM-19971     | 2009 | Mast of Bobal grape variety                    | 2.69 | 36.88 | 2908 | 89.34  | 164 | ERX359780 | AZEG0000000       | Plant        | L. salivarius                  |
| Lactobacillus vacciniostercus      | DSM-20634     | 1983 | Cow dung                                       | 2.57 | 43.48 | 2485 | 93.56  | 112 | ERX359731 | AYYY0000000       | Animal       | L. reuteri, L. vacciniostercus |
| Lactobacillus vaginalis            | DSM-5837      | 1989 | Vaginal swab                                   | 1.79 | 40.46 | 1733 | 67.13  | 149 | SRX456275 | AZGL0000000       | Animal       | L. reuteri, L. vacciniostercus |
| Lactobacillus veromoldensis        | DSM-14857     | 2003 | Poultry salami                                 | 2.37 | 38.27 | 2319 | 50.56  | 62  | SRX456244 | AZFA0000000       | Food         | L. alimentarius                |
| Lactobacillus vini                 | DSM-20605     | 2006 | Mast of grape                                  | 2.24 | 37.54 | 2191 | 53.62  | 269 | SRX456339 | AYYX0000000       | Plant        | L. salivarius                  |
| Lactobacillus xiangfangensis       | LMG-26013     | 2012 | Pickles                                        | 3.00 | 45.1  | 2806 | 80.11  | 145 | ERX359765 | QJCL0000000       | Food         | L. plantarum                   |
| Lactobacillus zeae                 | DSM-20178     | 1959 | Corn steep liquor                              | 3.12 | 47.74 | 3043 | 38.45  | 55  | SRX456369 | AZCT0000000       | Wine product | L. manihotivorum, L. casei     |
| Lactobacillus zymae                | DSM-16395     | 2005 | Artisanal wheat sourdough                      | 2.71 | 53.57 | 2460 | 88.66  | 75  | ERX399772 | AZDW0000000       | Food         | L. brevis, L. collinoides      |
| Lactococcus lactis                 | LMG-1760      | 1873 | Anchu mash                                     | 2.25 | 35.02 | 2237 | 89.07  | 45  | ERX359766 | QJCM0000000       | Food         | Other                          |
| Leuconostoc argentinum             | KCTC-3773     | 1993 | Raw milk                                       | 1.72 | 42.89 | 1821 | NA     | 98  | NA        | AEQQ0000000       | Food         | Leu_Fru                        |
| Leuconostoc carnosum               | JB16          | 1989 | Kinchi                                         | 1.77 | 37.13 | 1711 | NA     | 5   | NA        | T903S31 - CP0385  | Food         | Leu_Fru                        |
| Leuconostoc citrum                 | KM20          | 2008 | Kinchi                                         | 1.90 | 38.87 | 1866 | NA     | 5   | NA        | Q489736 - DQ48974 | Food         | Leu_Fru                        |
| Leuconostoc fallax                 | KCTC-3537     | 1992 | Sauerkraut                                     | 1.64 | 37.53 | 1916 | NA     | 30  | NA        | AELZ0000000       | Food         | Leu_Fru                        |
| Leuconostoc gasicomitatum          | LMG-18811     | 2001 | Tomato-marinated broiler meat strips           | 1.95 | 36.66 | 1929 | NA     | 1   | NA        | FNS22744          | Food         | Leu_Fru                        |
| Leuconostoc gelidium               | KCTC-3527     | 1989 | Vacuum packaged beef                           | 1.96 | 36.6  | 1951 | NA     | 43  | NA        | AEMB0000000       | Food         | Leu_Fru                        |
| Leuconostoc kimchi                 | DSSN-11154    | 2000 | Kinchi                                         | 2.10 | 37.91 | 2110 | NA     | 6   | NA        | T901753 - CP00175 | Food         | Leu_Fru                        |
| Leuconostoc mesenteroides          | ATCC-8293     | 1878 | Fermenting olives                              | 2.08 | 37.67 | 2056 | NA     | 2   | NA        | C_008496_NC_0085  | Food         | Leu_Fru                        |
| Leuconostoc mesenteroides cremoris | ATCC-19254    | 1929 | Hansen's dried starter powder                  | 1.74 | 37.9  | 1791 | NA     | 29  | NA        | C2K801            | Unknown      | Leu_Fru                        |
| Leuconostoc pseudomesenteroides    | 482           | N/A  | N/A                                            | 2.01 | 39.06 | 2180 | NA     | 106 | NA        | CARKV0000000      | Food         | Leu_Fru                        |
| Oenococcus kitaharae               | DSM-17330     | 2006 | Distilled residue of shochu mashes             | 1.84 | 42.68 | 1900 | NA     | 2   | NA        | AFVZ0000000       | Wine product | Oenococcus                     |
| Oenococcus oeni                    | ATCC-BAA-1163 | 2002 | Fermented beverages                            | 1.75 | 37.94 | 2055 | NA     | 62  | NA        | AAUV0000000       | Wine product | Oenococcus                     |
| Olsenella uli                      | DSM-7084      | 1991 | Human gingival crevice                         | 2.06 | 64.69 | 1848 | 97.22  | 13  | ERX399771 | QJCO0000000       | Animal       | Other                          |
| Pediococcus acidilactici           | ASI.2096      | N/A  | N/A                                            | 1.93 | 42.13 | 1849 | 51.85  | 18  | SRX689743 | QJQA0000000       | Unknown      | Pediococcus                    |
| Pediococcus argentinus             | DSM-23026     | 2008 | Fermented wheat flour                          | 1.76 | 36.67 | 1772 | 56.66  | 93  | SRX689746 | QJQC0000000       | Food         | Pediococcus                    |
| Pediococcus cellicola              | DSM-17757     | 2005 | Distilled piri-fermenting cellar               | 2.04 | 39.04 | 1974 | 49.06  | 22  | SRX689747 | QJBR0000000       | Wine product | Pediococcus                    |
| Pediococcus classeni               | DSM-14800     | 2002 | Spilled beer                                   | 1.88 | 36.74 | 1807 | 53.21  | 44  | SRX689748 | QJBB0000000       | Wine product | Pediococcus                    |
| Pediococcus damnosus               | DSM-20331     | 1903 | Lager beer yeast                               | 2.19 | 38.23 | 2085 | 45.63  | 201 | SRX689749 | QJBR0000000       | Wine product | Pediococcus                    |
| Pediococcus ethanolifurans         | DSM-22301     | 2006 | Walls of a distilled-spirit-fermenting cellar  | 2.26 | 37.18 | 2180 | 44.23  | 66  | SRX689750 | QJBY0000000       | Wine product | Pediococcus                    |
| Pediococcus inopinatus             | DSM-20285     | 1988 | Brewery yeast                                  | 2.11 | 38.61 | 2081 | 47.30  | 157 | SRX689751 | QJBC0000000       | Wine product | Pediococcus                    |
| Pediococcus holi                   | DSM-19927     | 1887 | Ryegrass silage                                | 2.04 | 42.13 | 1971 | 49.00  | 31  | SRX689752 | QJCC0000000       | Plant        | Pediococcus                    |
| Pediococcus parvulus               | DSM-20332     | 1961 | Silage                                         | 3.99 | 40.38 | 3917 | 25.04  | 153 | SRX689754 | QJBE0000000       | Plant        | Pediococcus                    |
| Pediococcus pentosaceus            | DSM-20336     | 1934 | Dried American beer yeast                      | 1.74 | 37.25 | 1887 | 57.49  | 28  | SRX689755 | QJBF0000000       | Wine product | Pediococcus                    |
| Pediococcus stilesii               | DSM-18001     | 2006 | White maize grains                             | 1.84 | 38.11 | 1834 | 54.41  | 47  | SRX689756 | QJBX0000000       | Plant        | Pediococcus                    |
| Weissella confusa                  | DSM-20396     | 1969 | Sugar cane                                     | 2.22 | 44.73 | 2075 | 90.16  | 40  | ERX359705 | QJAV0000000       | Plant        | Weissella                      |
| Weissella halotolerans             | DSM-20190     | 1983 | Sausage                                        | 1.37 | 43.06 | 1341 | 146.41 | 12  | ERX359698 | QJBO0000000       | Food         | Weissella                      |
| Weissella kandleri                 | DSM-20593     | 1983 | Desert spring                                  | 1.33 | 39.67 | 1281 | 149.88 | 21  | ERX359708 | QJBP0000000       | Environment  | Weissella                      |
| Weissella viridescens              | DSM-20014     | 1983 | Milking machine slime                          | 1.77 | 39.29 | 1777 | 112.85 | 59  | ERX359773 | QJCD0000000       | Food         | Weissella                      |
| Weissella vinifera                 | DSM-20410     | 1957 | Cured meat products                            | 1.54 | 41.09 | 1525 | 130.11 | 8   | ERX359781 | QJBM0000000       | Food         | Weissella                      |

**Table S2. Sequence information for the 73 core genes**

| PID*     | Gene         | locus tag* | COG        | Annotation                                                          | Co-ordinates*    | Strand* | Length* |
|----------|--------------|------------|------------|---------------------------------------------------------------------|------------------|---------|---------|
| 90960992 | <i>dnaN</i>  | LSL_0002   | COG0592L   | DNA polymerase III subunit beta                                     | 1532..2671       | +       | 1140    |
| 90960995 | <i>gyrB</i>  | LSL_0005   | COG0187L   | DNA gyrase subunit B                                                | 4451..6409       | +       | 1959    |
| 90960996 | <i>gyrA</i>  | LSL_0006   | COG0188L   | DNA gyrase subunit A                                                | 6446..8998       | +       | 2553    |
| 90960997 | <i>rpsF</i>  | LSL_0007   | COG0360J   | 30S ribosomal protein S6                                            | 9217..9507       | +       | 291     |
| 90960998 | <i>ssb</i>   | LSL_0008   | COG0629L   | Single-strand DNA binding protein                                   | 9548..10099      | +       | 552     |
| 90960999 | <i>rpsR</i>  | LSL_0009   | COG0238J   | 30S ribosomal protein S18                                           | 10121..10357     | +       | 237     |
| 90961180 | <i>rpoC</i>  | LSL_0198   | COG0086K   | DNA-directed RNA polymerase subunit beta'                           | 238653..242318   | +       | 3666    |
| 90961182 | <i>rpsL</i>  | LSL_0200   | COG0048J   | 30S ribosomal protein S12                                           | 243364..243777   | +       | 414     |
| 90961184 | <i>efg</i>   | LSL_0202   | COG0480J   | elongation factor G                                                 | 244403..246496   | +       | 2094    |
| 90961200 | <i>trpS</i>  | LSL_0218   | COG0180J   | Tryptophanyl-tRNA synthetase II                                     | 271973..272992   | +       | 1020    |
| 90961335 | <i>murF</i>  | LSL_0355   | COG0770M   | UDP-N-acetylmuramoyl-tripeptide--D-alanyl-D-alanine ligase          | 387857..389227   | +       | 1371    |
| 90961453 | -            | LSL_0477   | COG0537FGR | bis(5'-nucleosyl)-tetrphosphatase                                   | 525874..526302   | -       | 429     |
| 90961460 | -            | LSL_0484   | COG0073R   | tRNA-binding domain-containing protein                              | 530707..531357   | +       | 651     |
| 90961464 | <i>polA</i>  | LSL_0488   | COG0749L   | DNA polymerase I                                                    | 536545..539223   | +       | 2679    |
| 90961470 | <i>thrS</i>  | LSL_0494   | COG0441J   | threonyl-tRNA synthetase                                            | 543759..545708   | +       | 1950    |
| 90961471 | <i>infC</i>  | LSL_0495   | COG0290J   | translation initiation factor IF-3                                  | 545916..546440   | +       | 525     |
| 90961480 | -            | LSL_0504   | COG0799S   | lojap-related protein                                               | 552036..552389   | +       | 354     |
| 90961487 | <i>rpsB</i>  | LSL_0511   | COG0052J   | 30S ribosomal protein S2                                            | 557234..558031   | +       | 798     |
| 90961488 | <i>tsf</i>   | LSL_0512   | COG0264J   | elongation factor Ts                                                | 558125..559000   | +       | 876     |
| 90961519 | -            | LSL_0543   | COG0218R   | GTP-binding protein                                                 | 584473..585063   | +       | 591     |
| 90961537 | <i>pyrH</i>  | LSL_0561   | COG0528F   | uridylate kinase                                                    | 600230..600952   | +       | 723     |
| 90961538 | <i>frr</i>   | LSL_0562   | COG0233J   | ribosome recycling factor                                           | 600955..601518   | +       | 564     |
| 90961539 | <i>uppS</i>  | LSL_0563   | COG0020I   | undecaprenyl pyrophosphate synthetase                               | 601653..602435   | +       | 783     |
| 90961540 | <i>cdsA</i>  | LSL_0564   | COG0575I   | phosphatidate cytidylyltransferase                                  | 602438..603226   | +       | 789     |
| 90961544 | -            | LSL_0568   | COG0779S   | hypothetical protein                                                | 610934..611407   | +       | 474     |
| 90961545 | <i>nusA</i>  | LSL_0569   | COG0195K   | transcription elongation factor NusA                                | 611433..612560   | +       | 1128    |
| 90961567 | -            | LSL_0591   | COG2890J   | peptide release factor--glutamine N5-methyltransferase              | 634747..635586   | +       | 840     |
| 90961569 | <i>upp</i>   | LSL_0593   | COG0035F   | uracil phosphoribosyltransferase                                    | 636708..637337   | +       | 630     |
| 90961575 | <i>atpG</i>  | LSL_0599   | COG0224C   | FOF1 ATP synthase subunit gamma                                     | 641185..642114   | +       | 930     |
| 90961576 | <i>atpD</i>  | LSL_0600   | COG0055C   | FOF1 ATP synthase subunit beta                                      | 642139..643545   | +       | 1407    |
| 90961630 | <i>typA</i>  | LSL_0653   | COG1217T   | GTP-binding protein                                                 | 697034..698875   | +       | 1842    |
| 90961790 | <i>pheS</i>  | LSL_0813   | COG0016J   | phenylalanyl-tRNA synthetase subunit alpha                          | 829184..830230   | +       | 1047    |
| 90961836 | <i>pfs</i>   | LSL_0859   | COG0775F   | 5'-methylthioadenosine nucleosidase                                 | 878731..879417   | +       | 687     |
| 90962022 | <i>ftsZ</i>  | LSL_1047   | COG0206D   | cell division protein FtsZ                                          | 1070613..1071866 | -       | 1254    |
| 90962026 | <i>murD</i>  | LSL_1051   | COG0771M   | UDP-N-acetylmuramoyl-L-alanyl-D-glutamate synthetase                | 1075412..1076788 | -       | 1377    |
| 90962027 | <i>mraY</i>  | LSL_1052   | COG0472M   | phospho-N-acetylmuramoyl-pentapeptide-transferase                   | 1076817..1077785 | -       | 969     |
| 90962042 | <i>mreC</i>  | LSL_1067   | COG1792M   | rod shape-determining protein MreC                                  | 1089421..1090275 | -       | 855     |
| 90962072 | <i>obgE</i>  | LSL_1097   | COG0536R   | GTPase ObgE                                                         | 1125579..1126877 | -       | 1299    |
| 90962084 | -            | LSL_1109   | COG0816L   | Holliday junction resolvase-like protein                            | 1136102..1136533 | -       | 432     |
| 90962100 | <i>ruvB</i>  | LSL_1125   | COG2255L   | Holliday junction DNA helicase RuvB                                 | 1153506..1154516 | -       | 1011    |
| 90962101 | <i>ruvA</i>  | LSL_1126   | COG0632L   | Holliday junction DNA helicase RuvA                                 | 1154555..1155160 | -       | 606     |
| 90962106 | <i>pgsA</i>  | LSL_1131   | COG0558I   | CDP--diacylglycerol--glycerol-3-phosphate 3-phosphatidyltransferase | 1163042..1163629 | -       | 588     |
| 90962110 | <i>ftsK</i>  | LSL_1135   | COG1674D   | cell division protein                                               | 1168139..1170418 | -       | 2280    |
| 90962125 | -            | LSL_1150   | COG0802R   | ATP/GTP hydrolase                                                   | 1183489..1183941 | -       | 453     |
| 90962130 | <i>smpB</i>  | LSL_1155   | COG0691O   | SsrA-binding protein                                                | 1187273..1187740 | -       | 468     |
| 90962160 | <i>prfB</i>  | LSL_1185   | COG1186J   | peptide chain release factor 2                                      | 1222388..1223455 | -       | 1068    |
| 90962186 | <i>groEL</i> | LSL_1211   | COG0459O   | molecular chaperone GroEL                                           | 1246385..1248007 | -       | 1623    |
| 90962187 | <i>groS</i>  | LSL_1212   | COG0234O   | molecular chaperone GroES                                           | 1248037..1248321 | -       | 285     |
| 90962191 | <i>gcp</i>   | LSL_1216   | COG0533O   | O-sialoglycoprotein endopeptidase                                   | 1252076..1253107 | -       | 1032    |
| 90962198 | <i>holB</i>  | LSL_1223   | COG2812L   | DNA polymerase III subunit delta'                                   | 1257561..1258553 | -       | 993     |
| 90962199 | <i>tmk</i>   | LSL_1224   | COG0125F   | thymidylate kinase                                                  | 1258588..1259214 | -       | 627     |
| 90962204 | -            | LSL_1229   | COG0590FJ  | cytosine/adenosine deaminase                                        | 1262491..1262991 | -       | 501     |
| 90962212 | <i>rplJ</i>  | LSL_1238   | COG0244J   | 50S ribosomal protein L10                                           | 1271311..1271814 | -       | 504     |
| 90962215 | <i>nusG</i>  | LSL_1241   | COG0250K   | transcription antitermination protein                               | 1273402..1273962 | -       | 561     |
| 90962219 | <i>spoU</i>  | LSL_1245   | COG0566J   | tRNA/tRNA methyltransferase                                         | 1275013..1275759 | -       | 747     |
| 90962221 | <i>cysS</i>  | LSL_1247   | COG0215J   | cysteinylyl-tRNA synthetase                                         | 1276159..1277571 | -       | 1413    |
| 90962278 | <i>ppnK</i>  | LSL_1304   | COG0061G   | inorganic polyphosphate/ATP-NAD kinase                              | 1351254..1352060 | -       | 807     |
| 90962327 | -            | LSL_1355   | COG0037D   | tRNA(Ile)-lysine synthase TilS                                      | 1418710..1420068 | -       | 1359    |
| 90962332 | <i>mfd</i>   | LSL_1360   | COG1197LK  | transcription-repair coupling factor                                | 1422969..1426493 | -       | 3525    |
| 90962333 | <i>pth</i>   | LSL_1361   | COG0193J   | peptidyl-tRNA hydrolase                                             | 1426515..1427072 | -       | 558     |
| 90962374 | <i>rplM</i>  | LSL_1403   | COG0102J   | 50S ribosomal protein L13                                           | 1478312..1478755 | -       | 444     |
| 90962376 | <i>chiQ</i>  | LSL_1405   | COG0619P   | cobalt transport permease                                           | 1479676..1480470 | -       | 795     |
| 90962380 | <i>rpoA</i>  | LSL_1409   | COG0202K   | DNA-directed RNA polymerase subunit alpha                           | 1482888..1483832 | -       | 945     |
| 90962387 | <i>rplO</i>  | LSL_1416   | COG0200J   | 50S ribosomal protein L15                                           | 1487364..1487798 | -       | 435     |
| 90962389 | <i>rpsE</i>  | LSL_1418   | COG0098J   | 30S ribosomal protein S5                                            | 1488030..1488530 | -       | 501     |
| 90962391 | <i>rplF</i>  | LSL_1420   | COG0097J   | 50S ribosomal protein L6                                            | 1488953..1489489 | -       | 537     |
| 90962392 | <i>rpsH</i>  | LSL_1421   | COG0096J   | 30S ribosomal protein S8                                            | 1489522..1489920 | -       | 399     |
| 90962394 | <i>rplE</i>  | LSL_1423   | COG0094J   | 50S ribosomal protein L5                                            | 1490153..1490695 | -       | 543     |
| 90962400 | <i>rpsC</i>  | LSL_1429   | COG0092J   | 30S ribosomal protein S3                                            | 1492402..1493058 | -       | 657     |
| 90962404 | <i>rplW</i>  | LSL_1433   | COG0089J   | 50S ribosomal protein L23                                           | 1494625..1494909 | -       | 285     |
| 90962405 | <i>rplD</i>  | LSL_1434   | COG0088J   | 50S ribosomal protein L4                                            | 1494909..1495532 | -       | 624     |
| 90962406 | <i>rplC</i>  | LSL_1435   | COG0087J   | 50S ribosomal protein L3                                            | 1495557..1496180 | -       | 624     |
| 90962696 | <i>rplI</i>  | LSL_1727   | COG0359J   | 50S ribosomal protein L9                                            | 1809124..1809573 | -       | 450     |

\*These columns are provided according to the reference genome *L. salivarius* UCC118

**Table S3. Genera used in building the tree of bacteria**

| Accession No. | Phylum         | Class          | Order             | Family                | Genus                            | Species                                              |                                    |
|---------------|----------------|----------------|-------------------|-----------------------|----------------------------------|------------------------------------------------------|------------------------------------|
| NC_012483     | Acidobacteria  | Acidobacteria  | Acidobacteriales  | Acidobacteriaceae     | <i>Acidobacterium</i>            | <i>Acidobacterium capsulatum</i>                     |                                    |
| NC_014963     | Acidobacteria  | Acidobacteria  | Acidobacteriales  | Acidobacteriaceae     | <i>Terriglobus</i>               | <i>Terriglobus saanensis</i>                         |                                    |
| NC_015064     | Acidobacteria  | Acidobacteria  | Acidobacteriales  | Acidobacteriaceae     | <i>Granulicella</i>              | <i>Granulicella tundricola</i>                       |                                    |
| NC_008536     | Acidobacteria  | Solibacteres   | Solibacteriales   | Solibacteriaceae      | <i>Candidatus Solibacter</i>     | <i>Candidatus Solibacter ustitatus</i>               |                                    |
| NC_008009     | Acidobacteria  | Unclassified   | Unclassified      | Unclassified          | <i>Candidatus Koribacter</i>     | <i>Candidatus Koribacter versatilis</i>              |                                    |
| NC_000962     | Actinobacteria | Actinobacteria | Actinomycetales   | Mycobacteriaceae      | <i>Mycobacterium</i>             | <i>Mycobacterium tuberculosis</i>                    |                                    |
| NC_002935     | Actinobacteria | Actinobacteria | Actinomycetales   | Corynebacteriaceae    | <i>Corynebacterium</i>           | <i>Corynebacterium diphtheriae</i>                   |                                    |
| NC_003155     | Actinobacteria | Actinobacteria | Actinomycetales   | Streptomycetaceae     | <i>Streptomyces</i>              | <i>Streptomyces avermitilis</i>                      |                                    |
| NC_004307     | Actinobacteria | Actinobacteria | Bifidobacteriales | Bifidobacteriaceae    | <i>Bifidobacterium</i>           | <i>Bifidobacterium longum</i>                        |                                    |
| NC_004551     | Actinobacteria | Actinobacteria | Actinomycetales   | Unclassified          | <i>Tropheryma</i>                | <i>Tropheryma whipplei</i>                           |                                    |
| NC_006085     | Actinobacteria | Actinobacteria | Actinomycetales   | Propionibacteriaceae  | <i>Propionibacterium</i>         | <i>Propionibacterium acnes</i>                       |                                    |
| NC_006087     | Actinobacteria | Actinobacteria | Actinomycetales   | Microbacteriaceae     | <i>Leifsonia</i>                 | <i>Leifsonia xyli</i>                                |                                    |
| NC_006361     | Actinobacteria | Actinobacteria | Actinomycetales   | Nocardiaceae          | <i>Nocardia</i>                  | <i>Nocardia farcinica</i>                            |                                    |
| NC_007333     | Actinobacteria | Actinobacteria | Actinomycetales   | Nocardiopsaceae       | <i>Thermobifida</i>              | <i>Thermobifida fusca</i>                            |                                    |
| NC_007777     | Actinobacteria | Actinobacteria | Actinomycetales   | Frankiaceae           | <i>Frankia</i>                   | Unclassified                                         |                                    |
| NC_008148     | Actinobacteria | Actinobacteria | Rubrobacterales   | Rubrobacteraceae      | <i>Rubrobacter</i>               | <i>Rubrobacter xylanophilus</i>                      |                                    |
| NC_008268     | Actinobacteria | Actinobacteria | Actinomycetales   | Nocardiaceae          | <i>Rhodococcus</i>               | <i>Rhodococcus jostii</i>                            |                                    |
| NC_008541     | Actinobacteria | Actinobacteria | Actinomycetales   | Micrococcaceae        | <i>Arthrobacter</i>              | Unclassified                                         |                                    |
| NC_008578     | Actinobacteria | Actinobacteria | Actinomycetales   | Acidothermaceae       | <i>Acidothermus</i>              | <i>Acidothermus cellulolyticus</i>                   |                                    |
| NC_008699     | Actinobacteria | Actinobacteria | Actinomycetales   | Nocardioidaceae       | <i>Nocardioides</i>              | Unclassified                                         |                                    |
| NC_009142     | Actinobacteria | Actinobacteria | Actinomycetales   | Pseudonocardiaceae    | <i>Saccharopolyspora</i>         | <i>Saccharopolyspora erythraea</i>                   |                                    |
| NC_009380     | Actinobacteria | Actinobacteria | Actinomycetales   | Micromonosporaceae    | <i>Salinispora</i>               | <i>Salinispora tropica</i>                           |                                    |
| NC_009480     | Actinobacteria | Actinobacteria | Actinomycetales   | Microbacteriaceae     | <i>Clavibacter</i>               | <i>Clavibacter michiganensis</i>                     |                                    |
| NC_009664     | Actinobacteria | Actinobacteria | Actinomycetales   | Kineosporiaceae       | <i>Kineococcus</i>               | <i>Kineococcus radiotolerans</i>                     |                                    |
| NC_010168     | Actinobacteria | Actinobacteria | Actinomycetales   | Micrococcaceae        | <i>Renibacterium</i>             | <i>Renibacterium salmoninarum</i>                    |                                    |
| NC_010617     | Actinobacteria | Actinobacteria | Actinomycetales   | Micrococcaceae        | <i>Kocuria</i>                   | <i>Kocuria rhizophila</i>                            |                                    |
| NC_012669     | Actinobacteria | Actinobacteria | Actinomycetales   | Beutenbergiaceae      | <i>Beutenbergia</i>              | <i>Beutenbergia cavernae</i>                         |                                    |
| NC_012803     | Actinobacteria | Actinobacteria | Actinomycetales   | Micrococcaceae        | <i>Micrococcus</i>               | <i>Micrococcus luteus</i>                            |                                    |
| NC_013093     | Actinobacteria | Actinobacteria | Actinomycetales   | Pseudonocardiaceae    | <i>Actinosynnema</i>             | <i>Actinosynnema mirum</i>                           |                                    |
| NC_013124     | Actinobacteria | Actinobacteria | Actinomycetales   | Acidimicrobiales      | Acidimicrobiaceae                | <i>Acidimicrobium</i>                                | <i>Acidimicrobium ferrooxidans</i> |
| NC_013131     | Actinobacteria | Actinobacteria | Actinomycetales   | Catenulisporaceae     | <i>Catenulispora</i>             | <i>Catenulispora acidiphila</i>                      |                                    |
| NC_013159     | Actinobacteria | Actinobacteria | Actinomycetales   | Pseudonocardiaceae    | <i>Saccharomonospora</i>         | <i>Saccharomonospora viridis</i>                     |                                    |
| NC_013165     | Actinobacteria | Actinobacteria | Actinomycetales   | Coriobacteriales      | Coriobacteriaceae                | <i>Slackia</i>                                       | <i>Slackia heliotrinireducens</i>  |
| NC_013169     | Actinobacteria | Actinobacteria | Actinomycetales   | Dermacoccaceae        | <i>Kytococcus</i>                | <i>Kytococcus sedentarius</i>                        |                                    |
| NC_013170     | Actinobacteria | Actinobacteria | Actinomycetales   | Coriobacteriales      | Coriobacteriaceae                | <i>Cryptobacterium</i>                               | <i>Cryptobacterium curtum</i>      |
| NC_013172     | Actinobacteria | Actinobacteria | Actinomycetales   | Dermabacteraceae      | <i>Brachybacterium</i>           | <i>Brachybacterium faecium</i>                       |                                    |
| NC_013174     | Actinobacteria | Actinobacteria | Actinomycetales   | Jonesiaceae           | <i>Jonesia</i>                   | <i>Jonesia dentrificans</i>                          |                                    |
| NC_013203     | Actinobacteria | Actinobacteria | Actinomycetales   | Coriobacteriales      | Atopobium                        | <i>Atopobium parvulum</i>                            |                                    |
| NC_013204     | Actinobacteria | Actinobacteria | Actinomycetales   | Coriobacteriales      | Coriobacteriaceae                | <i>Eggerthella</i>                                   | <i>Eggerthella lenta</i>           |
| NC_013235     | Actinobacteria | Actinobacteria | Actinomycetales   | Nakamurellaceae       | <i>Nakamurella</i>               | <i>Nakamurella multipartita</i>                      |                                    |
| NC_013510     | Actinobacteria | Actinobacteria | Actinomycetales   | Thermomonosporaceae   | <i>Thermomonospora</i>           | <i>Thermomonospora curvata</i>                       |                                    |
| NC_013521     | Actinobacteria | Actinobacteria | Actinomycetales   | Sanguibacteraceae     | <i>Sanguibacter</i>              | <i>Sanguibacter keddicii</i>                         |                                    |
| NC_013530     | Actinobacteria | Actinobacteria | Actinomycetales   | Promicromonosporaceae | <i>Xylanimonas</i>               | <i>Xylanimonas cellulositytica</i>                   |                                    |
| NC_013595     | Actinobacteria | Actinobacteria | Actinomycetales   | Streptosporangiaceae  | <i>Streptosporangium</i>         | <i>Streptosporangium roseum</i>                      |                                    |
| NC_013715     | Actinobacteria | Actinobacteria | Actinomycetales   | Micrococcaceae        | <i>Rothia</i>                    | <i>Rothia mucilaginosus</i>                          |                                    |
| NC_013721     | Actinobacteria | Actinobacteria | Actinomycetales   | Bifidobacteriaceae    | <i>Gardnerella</i>               | <i>Gardnerella vaginalis</i>                         |                                    |
| NC_013739     | Actinobacteria | Actinobacteria | Actinomycetales   | Solirubrobacteriales  | Conexibacteraceae                | <i>Conexibacter</i>                                  | <i>Conexibacter woesei</i>         |
| NC_013947     | Actinobacteria | Actinobacteria | Actinomycetales   | Glycomycetaceae       | <i>Stackebrandtia</i>            | <i>Stackebrandtia nassauensis</i>                    |                                    |
| NC_014151     | Actinobacteria | Actinobacteria | Actinomycetales   | Cellulomonadaceae     | <i>Cellulomonas</i>              | <i>Cellulomonas flavigena</i>                        |                                    |
| NC_014158     | Actinobacteria | Actinobacteria | Actinomycetales   | Tsukamurellaceae      | <i>Tsukamurella</i>              | <i>Tsukamurella paurometabola</i>                    |                                    |
| NC_014165     | Actinobacteria | Actinobacteria | Actinomycetales   | Pseudonocardiaceae    | <i>Thermobispora</i>             | <i>Thermobispora bispora</i>                         |                                    |
| NC_014168     | Actinobacteria | Actinobacteria | Actinomycetales   | Segniliparaceae       | <i>Segniliparus</i>              | <i>Segniliparus rotundus</i>                         |                                    |
| NC_014218     | Actinobacteria | Actinobacteria | Actinomycetales   | Actinomycetaceae      | <i>Arcanobacterium</i>           | <i>Arcanobacterium haemolyticum</i>                  |                                    |
| NC_014246     | Actinobacteria | Actinobacteria | Actinomycetales   | Actinomycetaceae      | <i>Mobiluncus</i>                | <i>Mobiluncus curtisii</i>                           |                                    |
| NC_014318     | Actinobacteria | Actinobacteria | Actinomycetales   | Pseudonocardiaceae    | <i>Amycolatopsis</i>             | <i>Amycolatopsis mediterranei</i>                    |                                    |
| NC_014363     | Actinobacteria | Actinobacteria | Actinomycetales   | Coriobacteriales      | Coriobacteriaceae                | <i>Olsenella</i>                                     | <i>Olsenella uli</i>               |
| NC_014830     | Actinobacteria | Actinobacteria | Actinomycetales   | Intrasporangiaceae    | <i>Intrasporangium</i>           | <i>Intrasporangium calvum</i>                        |                                    |
| NC_015125     | Actinobacteria | Actinobacteria | Actinomycetales   | Microbacteriaceae     | <i>Microbacterium</i>            | <i>Microbacterium testaceum</i>                      |                                    |
| NC_015312     | Actinobacteria | Actinobacteria | Actinomycetales   | Pseudonocardiaceae    | <i>Pseudonocardia</i>            | <i>Pseudonocardia dioxanivorans</i>                  |                                    |
| NC_015389     | Actinobacteria | Actinobacteria | Actinomycetales   | Coriobacteriales      | Coriobacteriaceae                | <i>Coriobacterium</i>                                | <i>Coriobacterium glomerans</i>    |
| NC_015564     | Actinobacteria | Actinobacteria | Actinomycetales   | Mycobacteriaceae      | <i>Amycolicococcus</i>           | <i>Amycolicococcus subflavus</i>                     |                                    |
| NC_015588     | Actinobacteria | Actinobacteria | Actinomycetales   | Promicromonosporaceae | <i>Isoperitcola</i>              | <i>Isoperitcola variabilis</i>                       |                                    |
| NC_015635     | Actinobacteria | Actinobacteria | Actinomycetales   | Propionibacteriaceae  | <i>Microclunatus</i>             | <i>Microclunatus phosphovorius</i>                   |                                    |
| NC_000918     | Aquificae      | Aquificae      | Aquificales       | Aquificaceae          | <i>Aquifex</i>                   | <i>Aquifex aeolicus</i>                              |                                    |
| NC_010730     | Aquificae      | Aquificae      | Aquificales       | Hydrogenothermaceae   | <i>Sulfurihydrogenibium</i>      | Unclassified                                         |                                    |
| NC_011126     | Aquificae      | Aquificae      | Aquificales       | Aquificaceae          | <i>Hydrogenobaculum</i>          | Unclassified                                         |                                    |
| NC_012440     | Aquificae      | Aquificae      | Aquificales       | Hydrogenothermaceae   | <i>Persephonella</i>             | <i>Persephonella marina</i>                          |                                    |
| NC_013799     | Aquificae      | Aquificae      | Aquificales       | Aquificaceae          | <i>Hydrogenobacter</i>           | <i>Hydrogenobacter thermophilus</i>                  |                                    |
| NC_013894     | Aquificae      | Aquificae      | Aquificales       | Aquificaceae          | <i>Thermocrinis</i>              | <i>Thermocrinis albus</i>                            |                                    |
| NC_014926     | Aquificae      | Aquificae      | Aquificales       | Desulfurobacteriaceae | <i>Thermovibrio</i>              | <i>Thermovibrio ammonificans</i>                     |                                    |
| NC_015185     | Aquificae      | Aquificae      | Aquificales       | Desulfurobacteriaceae | <i>Desulfurobacterium</i>        | <i>Desulfurobacterium thermolithotrophum</i>         |                                    |
| NC_002950     | Bacteroidetes  | Bacteroidia    | Bacteroidales     | Porphyromonadaceae    | <i>Porphyromonas</i>             | <i>Porphyromonas gingivalis</i>                      |                                    |
| NC_003228     | Bacteroidetes  | Bacteroidia    | Bacteroidales     | Bacteroidaceae        | <i>Bacteroides</i>               | <i>Bacteroides fragilis</i>                          |                                    |
| NC_009615     | Bacteroidetes  | Bacteroidia    | Bacteroidales     | Porphyromonadaceae    | <i>Parabacteroides</i>           | <i>Parabacteroides distans</i>                       |                                    |
| NC_011565     | Bacteroidetes  | Bacteroidia    | Bacteroidales     | Unclassified          | <i>Candidatus Azobacteroides</i> | <i>Candidatus Azobacteroides pseudotrichonymphae</i> |                                    |
| NC_014033     | Bacteroidetes  | Bacteroidia    | Bacteroidales     | Prevotellaceae        | <i>Prevotella</i>                | <i>Prevotella ruminicola</i>                         |                                    |
| NC_014734     | Bacteroidetes  | Bacteroidia    | Bacteroidales     | Porphyromonadaceae    | <i>Paludibacter</i>              | <i>Paludibacter propionicigenes</i>                  |                                    |
| NC_015160     | Bacteroidetes  | Bacteroidia    | Bacteroidales     | Porphyromonadaceae    | <i>Odoribacter</i>               | <i>Odoribacter splanchnicus</i>                      |                                    |
| NC_008255     | Bacteroidetes  | Cytophagia     | Cytophagales      | Cytophagaceae         | <i>Cytophaga</i>                 | <i>Cytophaga hutchinsonii</i>                        |                                    |
| NC_013037     | Bacteroidetes  | Cytophagia     | Cytophagales      | Cytophagaceae         | <i>Dyadobacter</i>               | <i>Dyadobacter fermentans</i>                        |                                    |
| NC_013730     | Bacteroidetes  | Cytophagia     | Cytophagales      | Cytophagaceae         | <i>Spirosoma</i>                 | <i>Spirosoma linguale</i>                            |                                    |
| NC_014655     | Bacteroidetes  | Cytophagia     | Cytophagales      | Cytophagaceae         | <i>Leadbetterella</i>            | <i>Leadbetterella byssophila</i>                     |                                    |
| NC_014759     | Bacteroidetes  | Cytophagia     | Cytophagales      | Flammeovirgaceae      | <i>Marivirga</i>                 | <i>Marivirga tractuosa</i>                           |                                    |
| NC_015703     | Bacteroidetes  | Cytophagia     | Cytophagales      | Cytophagaceae         | <i>Runella</i>                   | <i>Runella slithyformis</i>                          |                                    |
| NC_015914     | Bacteroidetes  | Cytophagia     | Cytophagales      | Cyclobacteriaceae     | <i>Cyclobacterium</i>            | <i>Cyclobacterium marinum</i>                        |                                    |
| NC_008571     | Bacteroidetes  | Flavobacteria  | Flavobacteriales  | Flavobacteriaceae     | <i>Gramella</i>                  | <i>Gramella forsetii</i>                             |                                    |
| NC_009441     | Bacteroidetes  | Flavobacteria  | Flavobacteriales  | Flavobacteriaceae     | <i>Flavobacterium</i>            | <i>Flavobacterium johnsoniae</i>                     |                                    |

|           |                   |                 |                        |                            |                                  |                                                             |
|-----------|-------------------|-----------------|------------------------|----------------------------|----------------------------------|-------------------------------------------------------------|
| NC_013123 | Bacteroidetes     | Flavobacteria   | Flavobacteriales       | Unclassified               | <i>Candidatus Sulcia</i>         | <i>Candidatus Sulcia muelleri</i>                           |
| NC_013162 | Bacteroidetes     | Flavobacteria   | Flavobacteriales       | Flavobacteriaceae          | <i>Capnocytophaga</i>            | <i>Capnocytophaga ochracea</i>                              |
| NC_013222 | Bacteroidetes     | Flavobacteria   | Flavobacteriales       | Flavobacteriaceae          | <i>Robiginitalea</i>             | <i>Robiginitalea biformata</i>                              |
| NC_013418 | Bacteroidetes     | Flavobacteria   | Flavobacteriales       | Blattabacteriaceae         | <i>Blattabacterium</i>           | <i>Blattabacterium</i> sp. ( <i>Periplaneta americana</i> ) |
| NC_014041 | Bacteroidetes     | Flavobacteria   | Flavobacteriales       | Flavobacteriaceae          | <i>Zunongwangia</i>              | <i>Zunongwangia profunda</i>                                |
| NC_014230 | Bacteroidetes     | Flavobacteria   | Flavobacteriales       | Flavobacteriaceae          | <i>Croceibacter</i>              | <i>Croceibacter atlanticus</i>                              |
| NC_014472 | Bacteroidetes     | Flavobacteria   | Flavobacteriales       | Flavobacteriaceae          | <i>Maribacter</i>                | Unclassified                                                |
| NC_014738 | Bacteroidetes     | Flavobacteria   | Flavobacteriales       | Flavobacteriaceae          | <i>Riemerella</i>                | <i>Riemerella anatipestifer</i>                             |
| NC_014934 | Bacteroidetes     | Flavobacteria   | Flavobacteriales       | Flavobacteriaceae          | <i>Cellulophaga</i>              | <i>Cellulophaga algicola</i>                                |
| NC_015144 | Bacteroidetes     | Flavobacteria   | Flavobacteriales       | Flavobacteriaceae          | <i>Weeksella</i>                 | <i>Weeksella virosa</i>                                     |
| NC_015321 | Bacteroidetes     | Flavobacteria   | Flavobacteriales       | Cryomorphaeae              | <i>Fluviicola</i>                | <i>Fluviicola taffensis</i>                                 |
| NC_015496 | Bacteroidetes     | Flavobacteria   | Flavobacteriales       | Flavobacteriaceae          | <i>Krokinobacter</i>             | Unclassified                                                |
| NC_015638 | Bacteroidetes     | Flavobacteria   | Flavobacteriales       | Flavobacteriaceae          | <i>Lacinutrix</i>                | Unclassified                                                |
| NC_015844 | Bacteroidetes     | Flavobacteria   | Flavobacteriales       | Flavobacteriaceae          | <i>Zobellia</i>                  | Unclassified                                                |
| NC_015945 | Bacteroidetes     | Flavobacteria   | Flavobacteriales       | Flavobacteriaceae          | <i>Muricauda</i>                 | <i>Muricauda ruestringensis</i>                             |
| NC_013061 | Bacteroidetes     | Sphingobacteria | Sphingobacteriales     | Sphingobacteriaceae        | <i>Pedobacter</i>                | <i>Pedobacter heparinus</i>                                 |
| NC_013132 | Bacteroidetes     | Sphingobacteria | Sphingobacteriales     | Unclassified               | <i>Chitinophaga</i>              | <i>Chitinophaga pinensis</i>                                |
| NC_015277 | Bacteroidetes     | Sphingobacteria | Sphingobacteriales     | Sphingobacteriaceae        | <i>Sphingobacterium</i>          | Unclassified                                                |
| NC_015510 | Bacteroidetes     | Sphingobacteria | Sphingobacteriales     | Saprospiraceae             | <i>Haliscomenobacter</i>         | <i>Haliscomenobacter hydrossis</i>                          |
| NC_007677 | Bacteroidetes     | Unclassified    | Bacteroidetes Order II | Rhodothermaceae            | <i>Salinibacter</i>              | <i>Salinibacter ruber</i>                                   |
| NC_010830 | Bacteroidetes     | Unclassified    | Unclassified           | Unclassified               | <i>Candidatus Amoebophilus</i>   | <i>Candidatus Amoebophilus asiaticus</i>                    |
| NC_015966 | Bacteroidetes     | Unclassified    | Bacteroidetes Order II | Rhodothermaceae            | <i>Rhodothermus</i>              | <i>Rhodothermus marinus</i>                                 |
| NC_000117 | Chlamydiae        | Chlamydia       | Chlamydiales           | Chlamydiaceae              | <i>Chlamydia</i>                 | <i>Chlamydia trachomatis</i>                                |
| NC_003361 | Chlamydiae        | Chlamydia       | Chlamydiales           | Chlamydiaceae              | <i>Chlamydomydia</i>             | <i>Chlamydomydia caviae</i>                                 |
| NC_005861 | Chlamydiae        | Chlamydia       | Chlamydiales           | Parachlamydiaceae          | <i>Candidatus Protochlamydia</i> | <i>Candidatus Protochlamydia amoebophila</i>                |
| NC_014225 | Chlamydiae        | Chlamydia       | Chlamydiales           | Waddliaceae                | <i>Waddlia</i>                   | <i>Waddlia chondrophila</i>                                 |
| NC_015702 | Chlamydiae        | Chlamydia       | Chlamydiales           | Parachlamydiaceae          | <i>Parachlamydia</i>             | <i>Parachlamydia acanthamoebae</i>                          |
| NC_015713 | Chlamydiae        | Chlamydia       | Chlamydiales           | Simkaniaceae               | <i>Simkania</i>                  | <i>Simkania negevensis</i>                                  |
| NC_002932 | Chlorobiales      | Chlorobia       | Chlorobiales           | Chlorobiaceae              | <i>Chlorobaculum</i>             | <i>Chlorobaculum tepidum</i>                                |
| NC_007514 | Chlorobi          | Chlorobia       | Chlorobiales           | Chlorobiaceae              | <i>Chlorobium</i>                | <i>Chlorobium chlorochromatii</i>                           |
| NC_011026 | Chlorobi          | Chlorobia       | Chlorobiales           | Chlorobiaceae              | <i>Chloroherpeton</i>            | <i>Chloroherpeton thalassium</i>                            |
| NC_011059 | Chlorobi          | Chlorobia       | Chlorobiales           | Chlorobiaceae              | <i>Prosthecochloris</i>          | <i>Prosthecochloris aestuarii</i>                           |
| NC_011060 | Chlorobi          | Chlorobia       | Chlorobiales           | Chlorobiaceae              | <i>Pelodictyon</i>               | <i>Pelodictyon phaeoclastratiforme</i>                      |
| NC_014960 | Chloroflexi       | Anaerolineae    | Anaerolineales         | Anaerolineaceae            | <i>Anaerolinea</i>               | <i>Anaerolinea thermophila</i>                              |
| NC_009523 | Chloroflexi       | Chloroflexi     | Chloroflexales         | Chloroflexaceae            | <i>Roseiflexus</i>               | Unclassified                                                |
| NC_009972 | Chloroflexi       | Chloroflexi     | Herpetosiphonales      | Herpetosiphonaceae         | <i>Herpetosiphon</i>             | <i>Herpetosiphon aurantiacus</i>                            |
| NC_010175 | Chloroflexi       | Chloroflexi     | Chloroflexales         | Chloroflexaceae            | <i>Chloroflexus</i>              | <i>Chloroflexus aurantiacus</i>                             |
| NC_002936 | Chloroflexi       | Dehalococcoidia | Dehalococcoidales      | Dehalococcoidaceae         | <i>Dehalococcoides</i>           | <i>Dehalococcoides mccartyi</i>                             |
| NC_014314 | Chloroflexi       | Dehalococcoidia | Unclassified           | Unclassified               | <i>Dehalogenimonas</i>           | <i>Dehalogenimonas lykanthroporepellens</i>                 |
| NC_011959 | Chloroflexi       | Thermomicrobia  | Thermomicrobiales      | Thermomicrobiaceae         | <i>Thermomicrobium</i>           | <i>Thermomicrobium roseum</i>                               |
| NC_013523 | Chloroflexi       | Thermomicrobia  | Sphaerobacterales      | Sphaerobacteraceae         | <i>Sphaerobacter</i>             | <i>Sphaerobacter thermophilus</i>                           |
| NC_014836 | Chrysiogenetes    | Chrysiogenetes  | Chrysiogenales         | Chrysiogenaceae            | <i>Desulfurispirillum</i>        | <i>Desulfurispirillum indicum</i>                           |
| NC_005125 | Cyanobacteria     | Gloeobacteria   | Gloeobacterales        | Unclassified               | <i>Gloeobacter</i>               | <i>Gloeobacter violaceus</i>                                |
| NC_003272 | Cyanobacteria     | Unclassified    | Nostocales             | Nostocaceae                | <i>Nostoc</i>                    | Unclassified                                                |
| NC_004113 | Cyanobacteria     | Unclassified    | Chroococcales          | Unclassified               | <i>Thermosynechococcus</i>       | <i>Thermosynechococcus elongatus</i>                        |
| NC_005042 | Cyanobacteria     | Unclassified    | Prochlorales           | Prochlorococcaceae         | <i>Prochlorococcus</i>           | <i>Prochlorococcus marinus</i>                              |
| NC_005070 | Cyanobacteria     | Unclassified    | Chroococcales          | Unclassified               | <i>Synechococcus</i>             | Unclassified                                                |
| NC_007413 | Cyanobacteria     | Unclassified    | Nostocales             | Nostocaceae                | <i>Anabaena</i>                  | <i>Anabaena variabilis</i>                                  |
| NC_008312 | Cyanobacteria     | Unclassified    | Oscillatoriales        | Unclassified               | <i>Trichodesmium</i>             | <i>Trichodesmium erythraeum</i>                             |
| NC_011726 | Cyanobacteria     | Unclassified    | Chroococcales          | Unclassified               | <i>Cyanothece</i>                | Unclassified                                                |
| NC_014248 | Cyanobacteria     | Unclassified    | Nostocales             | Nostocaceae                | <i>Trichormus</i>                | <i>Trichormus azollae</i>                                   |
| NC_013939 | Deferribacteres   | Deferribacteres | Deferribacterales      | Deferribacteraceae         | <i>Deferribacter</i>             | <i>Deferribacter desulfuricans</i>                          |
| NC_013943 | Deferribacteres   | Deferribacteres | Deferribacterales      | Deferribacteraceae         | <i>Denitrovibrio</i>             | <i>Denitrovibrio acetiphilus</i>                            |
| NC_014758 | Deferribacteres   | Deferribacteres | Deferribacterales      | Deferribacteraceae         | <i>Calditerrivibrio</i>          | <i>Calditerrivibrio nitroreducens</i>                       |
| NC_015672 | Deferribacteres   | Deferribacteres | Deferribacterales      | Deferribacteraceae         | <i>Flexistipes</i>               | <i>Flexistipes sinusarabici</i>                             |
| NC_001263 | Deinococcus-Therm | Deinococci      | Deinococcales          | Deinococcaceae             | <i>Deinococcus</i>               | <i>Deinococcus radiodurans</i>                              |
| NC_005835 | Deinococcus-Therm | Deinococci      | Thermales              | Thermaceae                 | <i>Thermus</i>                   | <i>Thermus thermophilus</i>                                 |
| NC_013946 | Deinococcus-Therm | Deinococci      | Thermales              | Thermaceae                 | <i>Meiothermus</i>               | <i>Meiothermus ruber</i>                                    |
| NC_014221 | Deinococcus-Therm | Deinococci      | Deinococcales          | Trueperaceae               | <i>Truepera</i>                  | <i>Truepera radiovictrix</i>                                |
| NC_014761 | Deinococcus-Therm | Deinococci      | Thermales              | Thermaceae                 | <i>Oceanithermus</i>             | <i>Oceanithermus profundus</i>                              |
| NC_015387 | Deinococcus-Therm | Deinococci      | Thermales              | Thermaceae                 | <i>Marinithermus</i>             | <i>Marinithermus hydrothermalis</i>                         |
| NC_011297 | Dictyoglomi       | Dictyoglomia    | Dictyoglomales         | Dictyoglomaceae            | <i>Dictyoglomium</i>             | <i>Dictyoglomium thermophilum</i>                           |
| NC_010644 | Elusimicrobia     | Elusimicrobia   | Elusimicrobiales       | Elusimicrobiaceae          | <i>Elusimicrobium</i>            | <i>Elusimicrobium minutum</i>                               |
| NC_013410 | Fibrobacteres     | Fibrobacteria   | Fibrobacterales        | Fibrobacteraceae           | <i>Fibrobacter</i>               | <i>Fibrobacter succinogenes</i>                             |
| NC_000964 | Firmicutes        | Bacilli         | Bacillales             | Bacillaceae                | <i>Bacillus</i>                  | <i>Bacillus subtilis</i>                                    |
| NC_002662 | Firmicutes        | Bacilli         | Lactobacillales        | Streptococcaceae           | <i>Lactococcus</i>               | <i>Lactococcus lactis</i>                                   |
| NC_002737 | Firmicutes        | Bacilli         | Lactobacillales        | Streptococcaceae           | <i>Streptococcus</i>             | <i>Streptococcus pyogenes</i>                               |
| NC_002745 | Firmicutes        | Bacilli         | Bacillales             | Staphylococcaceae          | <i>Staphylococcus</i>            | <i>Staphylococcus aureus</i>                                |
| NC_004193 | Firmicutes        | Bacilli         | Bacillales             | Bacillaceae                | <i>Oceanobacillus</i>            | <i>Oceanobacillus iheyensis</i>                             |
| NC_004567 | Firmicutes        | Bacilli         | Lactobacillales        | Lactobacillaceae           | <i>Lactobacillus</i>             | <i>Lactobacillus plantarum</i>                              |
| NC_006510 | Firmicutes        | Bacilli         | Bacillales             | Bacillaceae                | <i>Geobacillus</i>               | <i>Geobacillus kaustophilus</i>                             |
| NC_008525 | Firmicutes        | Bacilli         | Lactobacillales        | Lactobacillaceae           | <i>Pediococcus</i>               | <i>Pediococcus pentosaceus</i>                              |
| NC_008528 | Firmicutes        | Bacilli         | Lactobacillales        | Leuconostocaceae           | <i>Oenococcus</i>                | <i>Oenococcus oeni</i>                                      |
| NC_008531 | Firmicutes        | Bacilli         | Lactobacillales        | Leuconostocaceae           | <i>Leuconostoc</i>               | <i>Leuconostoc mesenteroides</i>                            |
| NC_008555 | Firmicutes        | Bacilli         | Bacillales             | Listeriaceae               | <i>Listeria</i>                  | <i>Listeria welshimeri</i>                                  |
| NC_010556 | Firmicutes        | Bacilli         | Bacillales             | Unclassified               | <i>Exiguobacterium</i>           | <i>Exiguobacterium sibiricum</i>                            |
| NC_011567 | Firmicutes        | Bacilli         | Bacillales             | Bacillaceae                | <i>Anoxybacillus</i>             | <i>Anoxybacillus flavithermus</i>                           |
| NC_011999 | Firmicutes        | Bacilli         | Bacillales             | Staphylococcaceae          | <i>Macrocooccus</i>              | <i>Macrocooccus caseolyticus</i>                            |
| NC_012491 | Firmicutes        | Bacilli         | Bacillales             | Paenibacillaceae           | <i>Brevibacillus</i>             | <i>Brevibacillus brevis</i>                                 |
| NC_012914 | Firmicutes        | Bacilli         | Bacillales             | Paenibacillaceae           | <i>Paenibacillus</i>             | Unclassified                                                |
| NC_013205 | Firmicutes        | Bacilli         | Bacillales             | Alicyclobacillaceae        | <i>Alicyclobacillus</i>          | <i>Alicyclobacillus acidocaldarius</i>                      |
| NC_014098 | Firmicutes        | Bacilli         | Bacillales             | Alicyclobacillaceae        | <i>Kyrpidia</i>                  | <i>Kyrpidia tusciae</i>                                     |
| NC_015278 | Firmicutes        | Bacilli         | Lactobacillales        | Aerococcaceae              | <i>Aerococcus</i>                | <i>Aerococcus urinae</i>                                    |
| NC_015391 | Firmicutes        | Bacilli         | Lactobacillales        | Camobacteriaceae           | <i>Camobacterium</i>             | Unclassified                                                |
| NC_015516 | Firmicutes        | Bacilli         | Lactobacillales        | Enterococcaceae            | <i>Melissococcus</i>             | <i>Melissococcus plutonius</i>                              |
| NC_015759 | Firmicutes        | Bacilli         | Lactobacillales        | Leuconostocaceae           | <i>Weissella</i>                 | <i>Weissella koreensis</i>                                  |
| NC_003030 | Firmicutes        | Clostridia      | Clostridiales          | Clostridiaceae             | <i>Clostridium</i>               | <i>Clostridium acetobutylicum</i>                           |
| NC_003869 | Firmicutes        | Clostridia      | Thermoanaerobacterale  | Thermoanaerobacteraceae    | <i>Caldanaerobacter</i>          | <i>Caldanaerobacter subterraneus</i>                        |
| NC_006177 | Firmicutes        | Clostridia      | Clostridiales          | Clostridiales Family XVIII | In <i>Symbiobacterium</i>        | <i>Symbiobacterium thermophilum</i>                         |
| NC_007503 | Firmicutes        | Clostridia      | Thermoanaerobacterale  | Thermoanaerobacteraceae    | <i>Carboxydotherrmus</i>         | <i>Carboxydotherrmus hydrogenofmans</i>                     |



|           |                  |                     |                                                    |                                       |                                                    |
|-----------|------------------|---------------------|----------------------------------------------------|---------------------------------------|----------------------------------------------------|
| NC_007644 | Firmicutes       | Clostridia          | Thermoanaerobacterale: Thermoanaerobacteraceae     | <i>Moorella</i>                       | <i>Moorella thermoacetica</i>                      |
| NC_007907 | Firmicutes       | Clostridia          | Clostridiales                                      | <i>Desulfotobacterium</i>             | <i>Desulfotobacterium hafniense</i>                |
| NC_008346 | Firmicutes       | Clostridia          | Clostridiales                                      | <i>Syntrophomonadaceae</i>            | <i>Syntrophomonas wolfei</i>                       |
| NC_009253 | Firmicutes       | Clostridia          | Clostridiales                                      | <i>Peptococcaceae</i>                 | <i>Desulfotomaculum</i>                            |
| NC_009437 | Firmicutes       | Clostridia          | Thermoanaerobacterale: Thermoanaerobacterales Fami | <i>Caldicellulosiruptor</i>           | <i>Caldicellulosiruptor saccharolyticus</i>        |
| NC_009454 | Firmicutes       | Clostridia          | Clostridiales                                      | <i>Peptococcaceae</i>                 | <i>Pelotomaculum</i>                               |
| NC_009633 | Firmicutes       | Clostridia          | Clostridiales                                      | <i>Clostridiaceae</i>                 | <i>Alkaliphilus</i>                                |
| NC_010320 | Firmicutes       | Clostridia          | Thermoanaerobacterale: Thermoanaerobacteraceae     | <i>Thermoanaerobacter</i>             | Unclassified                                       |
| NC_010337 | Firmicutes       | Clostridia          | Clostridiales                                      | <i>Heliobacteriaceae</i>              | <i>Heliobacterium</i>                              |
| NC_010376 | Firmicutes       | Clostridia          | Clostridiales                                      | <i>Clostridiales Family XI. Incer</i> | <i>Finegoldia</i>                                  |
| NC_010424 | Firmicutes       | Clostridia          | Clostridiales                                      | <i>Peptococcaceae</i>                 | <i>Candidatus Desulforudis</i>                     |
| NC_010718 | Firmicutes       | Clostridia          | Natranaerobiales                                   | <i>Natranerobiaceae</i>               | <i>Natranerobius</i>                               |
| NC_011295 | Firmicutes       | Clostridia          | Thermoanaerobacterale: Thermodesulfobiaceae        | <i>Coprothermobacter</i>              | <i>Coprothermobacter proteolyticus</i>             |
| NC_011899 | Firmicutes       | Clostridia          | Halanaerobiales                                    | <i>Halanaerobiaceae</i>               | <i>Halothermothrix</i>                             |
| NC_012781 | Firmicutes       | Clostridia          | Clostridiales                                      | <i>Eubacteriaceae</i>                 | <i>Eubacterium</i>                                 |
| NC_013171 | Firmicutes       | Clostridia          | Clostridiales                                      | <i>Clostridiales Family XI. Incer</i> | <i>Anaerococcus</i>                                |
| NC_013385 | Firmicutes       | Clostridia          | Thermoanaerobacterale: Thermoanaerobacteraceae     | <i>Ammonifex</i>                      | <i>Ammonifex degensii</i>                          |
| NC_014152 | Firmicutes       | Clostridia          | Clostridiales                                      | <i>Peptococcaceae</i>                 | <i>Thermincola</i>                                 |
| NC_014220 | Firmicutes       | Clostridia          | Clostridiales                                      | <i>Syntrophomonadaceae</i>            | <i>Syntrophothermus</i>                            |
| NC_014377 | Firmicutes       | Clostridia          | Thermoanaerobacterale: Thermoanaerobacterales Fami | <i>Thermosediminibacter</i>           | <i>Thermosediminibacter oceani</i>                 |
| NC_014378 | Firmicutes       | Clostridia          | Halanaerobiales                                    | <i>Halobacteroidaceae</i>             | <i>Acetohalobium</i>                               |
| NC_014387 | Firmicutes       | Clostridia          | Clostridiales                                      | <i>Lachnospiraceae</i>                | <i>Butyrivibrio</i>                                |
| NC_014410 | Firmicutes       | Clostridia          | Thermoanaerobacterale: Thermoanaerobacterales Fami | <i>Thermoanaerobacterium</i>          | <i>Thermoanaerobacterium thermosaccharolyticum</i> |
| NC_014654 | Firmicutes       | Clostridia          | Halanaerobiales                                    | <i>Halanaerobiaceae</i>               | <i>Halanaerobium</i>                               |
| NC_014828 | Firmicutes       | Clostridia          | Clostridiales                                      | <i>Ruminococcaceae</i>                | <i>Ethanoligenens</i>                              |
| NC_014831 | Firmicutes       | Clostridia          | Clostridiales                                      | <i>Clostridiales Family XVII. Inc</i> | <i>Thermaerobacter</i>                             |
| NC_014833 | Firmicutes       | Clostridia          | Clostridiales                                      | <i>Ruminococcaceae</i>                | <i>Ruminococcus</i>                                |
| NC_015172 | Firmicutes       | Clostridia          | Clostridiales                                      | <i>Peptococcaceae</i>                 | <i>Syntrophobotulus</i>                            |
| NC_015275 | Firmicutes       | Clostridia          | Clostridiales                                      | <i>Lachnospiraceae</i>                | <i>Cellulosilyticum</i>                            |
| NC_015499 | Firmicutes       | Clostridia          | Thermoanaerobacterale: Thermodesulfobiaceae        | <i>Thermodesulfobium</i>              | <i>Thermodesulfobium narugense</i>                 |
| NC_015519 | Firmicutes       | Clostridia          | Thermoanaerobacterale: Thermoanaerobacteraceae     | <i>Tepidanaerobacter</i>              | <i>Tepidanaerobacter acetatoxydans</i>             |
| NC_015520 | Firmicutes       | Clostridia          | Thermoanaerobacterale: Thermoanaerobacterales Fami | <i>Mahella</i>                        | <i>Mahella australiensis</i>                       |
| NC_015757 | Firmicutes       | Clostridia          | Clostridiales                                      | <i>Clostridiales Family XVII. Inc</i> | <i>Sulfobacillus</i>                               |
| NC_015913 | Firmicutes       | Clostridia          | Clostridiales                                      | <i>Clostridiaceae</i>                 | <i>Candidatus Arthromitus</i>                      |
| NC_015977 | Firmicutes       | Clostridia          | Clostridiales                                      | <i>Lachnospiraceae</i>                | <i>Roseburia</i>                                   |
| NC_015601 | Firmicutes       | Erysipelotrichia    | Erysipelotrichales                                 | <i>Erysipelotrichaceae</i>            | <i>Erysipelothrix</i>                              |
| NC_013520 | Firmicutes       | Negativicutes       | Selenomonadales                                    | <i>Veillonellaceae</i>                | <i>Veillonella</i>                                 |
| NC_013740 | Firmicutes       | Negativicutes       | Selenomonadales                                    | <i>Acidaminococcaceae</i>             | <i>Acidaminococcus</i>                             |
| NC_015437 | Firmicutes       | Negativicutes       | Selenomonadales                                    | <i>Veillonellaceae</i>                | <i>Selenomonas</i>                                 |
| NC_003454 | Fusobacteria     | Fusobacteria        | Fusobacteriales                                    | <i>Fusobacteriaceae</i>               | <i>Fusobacterium</i>                               |
| NC_013192 | Fusobacteria     | Fusobacteria        | Fusobacteriales                                    | <i>Leptotrichiaceae</i>               | <i>Leptotrichia</i>                                |
| NC_013515 | Fusobacteria     | Fusobacteria        | Fusobacteriales                                    | <i>Leptotrichiaceae</i>               | <i>Streptobacillus</i>                             |
| NC_014632 | Fusobacteria     | Fusobacteria        | Fusobacteriales                                    | <i>Fusobacteriaceae</i>               | <i>Ilyobacter</i>                                  |
| NC_012489 | Gemmatimonadetes | Gemmatimonadetes    | Gemmatimonadales                                   | <i>Gemmatimonadaceae</i>              | <i>Gemmatimonas</i>                                |
| NC_011296 | Nitrospirae      | Nitrospira          | Nitrospirales                                      | <i>Nitrospiraceae</i>                 | <i>Thermodesulfovibrio</i>                         |
| NC_014355 | Nitrospirae      | Nitrospira          | Nitrospirales                                      | <i>Nitrospiraceae</i>                 | <i>Nitrospira</i>                                  |
| NC_005027 | Planctomycetes   | Planctomycetia      | Planctomycetales                                   | <i>Planctomycetaceae</i>              | <i>Rhodopirellula</i>                              |
| NC_013720 | Planctomycetes   | Planctomycetia      | Planctomycetales                                   | <i>Planctomycetaceae</i>              | <i>Pirellula</i>                                   |
| NC_014148 | Planctomycetes   | Planctomycetia      | Planctomycetales                                   | <i>Planctomycetaceae</i>              | <i>Planctomyces</i>                                |
| NC_014962 | Planctomycetes   | Planctomycetia      | Planctomycetales                                   | <i>Planctomycetaceae</i>              | <i>Isosphaera</i>                                  |
| NC_000963 | Proteobacteria   | Alphaproteobacteria | Rickettsiales                                      | <i>Rickettsiaceae</i>                 | <i>Rickettsia</i>                                  |
| NC_002678 | Proteobacteria   | Alphaproteobacteria | Rhizobiales                                        | <i>Phyllobacteriaceae</i>             | <i>Mesorhizobium</i>                               |
| NC_002696 | Proteobacteria   | Alphaproteobacteria | Caulobacterales                                    | <i>Caulobacteraceae</i>               | <i>Caulobacter</i>                                 |
| NC_003047 | Proteobacteria   | Alphaproteobacteria | Rhizobiales                                        | <i>Rhizobiaceae</i>                   | <i>Sinorhizobium</i>                               |
| NC_003317 | Proteobacteria   | Alphaproteobacteria | Rhizobiales                                        | <i>Brucellaceae</i>                   | <i>Brucella</i>                                    |
| NC_003911 | Proteobacteria   | Alphaproteobacteria | Rhodobacterales                                    | <i>Rhodobacteraceae</i>               | <i>Ruegeria</i>                                    |
| NC_004463 | Proteobacteria   | Alphaproteobacteria | Rhizobiales                                        | <i>Bradyrhizobiaceae</i>              | <i>Bradyrhizobium</i>                              |
| NC_005295 | Proteobacteria   | Alphaproteobacteria | Rickettsiales                                      | <i>Anaplasmataceae</i>                | <i>Ehrlichia</i>                                   |
| NC_005296 | Proteobacteria   | Alphaproteobacteria | Rhizobiales                                        | <i>Bradyrhizobiaceae</i>              | <i>Rhodopseudomonas</i>                            |
| NC_005955 | Proteobacteria   | Alphaproteobacteria | Rhizobiales                                        | <i>Bartonellaceae</i>                 | <i>Bartonella</i>                                  |
| NC_006526 | Proteobacteria   | Alphaproteobacteria | Sphingomonadales                                   | <i>Sphingomonadaceae</i>              | <i>Zymomonas</i>                                   |
| NC_006677 | Proteobacteria   | Alphaproteobacteria | Rhodospirillales                                   | <i>Acetobacteraceae</i>               | <i>Gluconobacter</i>                               |
| NC_007205 | Proteobacteria   | Alphaproteobacteria | Unclassified                                       | Unclassified                          | <i>Candidatus Pelagibacter</i>                     |
| NC_007406 | Proteobacteria   | Alphaproteobacteria | Rhizobiales                                        | <i>Bradyrhizobiaceae</i>              | <i>Nitrobacter</i>                                 |
| NC_007493 | Proteobacteria   | Alphaproteobacteria | Rhodobacterales                                    | <i>Rhodobacteraceae</i>               | <i>Rhodobacter</i>                                 |
| NC_007626 | Proteobacteria   | Alphaproteobacteria | Rhodospirillales                                   | <i>Rhodospirillaceae</i>              | <i>Magnetospirillum</i>                            |
| NC_007643 | Proteobacteria   | Alphaproteobacteria | Rhodospirillales                                   | <i>Rhodospirillaceae</i>              | <i>Rhodospirillum</i>                              |
| NC_007722 | Proteobacteria   | Alphaproteobacteria | Sphingomonadales                                   | <i>Erythrobacteraceae</i>             | <i>Erythrobacter</i>                               |
| NC_007761 | Proteobacteria   | Alphaproteobacteria | Rhizobiales                                        | <i>Rhizobiaceae</i>                   | <i>Rhizobium</i>                                   |
| NC_007794 | Proteobacteria   | Alphaproteobacteria | Sphingomonadales                                   | <i>Sphingomonadaceae</i>              | <i>Novosphingobium</i>                             |
| NC_007797 | Proteobacteria   | Alphaproteobacteria | Rickettsiales                                      | <i>Anaplasmataceae</i>                | <i>Anaplasma</i>                                   |
| NC_007798 | Proteobacteria   | Alphaproteobacteria | Rickettsiales                                      | <i>Anaplasmataceae</i>                | <i>Neorickettsia</i>                               |
| NC_007802 | Proteobacteria   | Alphaproteobacteria | Rhodobacterales                                    | <i>Rhodobacteraceae</i>               | <i>Jannaschia</i>                                  |
| NC_008048 | Proteobacteria   | Alphaproteobacteria | Sphingomonadales                                   | <i>Sphingomonadaceae</i>              | <i>Sphingopyxis</i>                                |
| NC_008209 | Proteobacteria   | Alphaproteobacteria | Rhodobacterales                                    | <i>Rhodobacteraceae</i>               | <i>Roseobacter</i>                                 |
| NC_008254 | Proteobacteria   | Alphaproteobacteria | Rhizobiales                                        | <i>Phyllobacteriaceae</i>             | <i>Chelativorans</i>                               |
| NC_008343 | Proteobacteria   | Alphaproteobacteria | Rhodospirillales                                   | <i>Acetobacteraceae</i>               | <i>Granulibacter</i>                               |
| NC_008347 | Proteobacteria   | Alphaproteobacteria | Rhodobacterales                                    | <i>Hyphomonadaceae</i>                | <i>Maricaulis</i>                                  |
| NC_008358 | Proteobacteria   | Alphaproteobacteria | Rhodobacterales                                    | <i>Hyphomonadaceae</i>                | <i>Hyphomonas</i>                                  |
| NC_008576 | Proteobacteria   | Alphaproteobacteria | Magnetococcales                                    | <i>Magnetococcaceae</i>               | <i>Magnetococcus</i>                               |
| NC_009484 | Proteobacteria   | Alphaproteobacteria | Rhodospirillales                                   | <i>Acetobacteraceae</i>               | <i>Acidiphilium</i>                                |
| NC_009488 | Proteobacteria   | Alphaproteobacteria | Rickettsiales                                      | <i>Rickettsiaceae</i>                 | <i>Orientia</i>                                    |
| NC_009511 | Proteobacteria   | Alphaproteobacteria | Sphingomonadales                                   | <i>Sphingomonadaceae</i>              | <i>Sphingomonas</i>                                |
| NC_009667 | Proteobacteria   | Alphaproteobacteria | Rhizobiales                                        | <i>Brucellaceae</i>                   | <i>Ochrobactrum</i>                                |
| NC_009719 | Proteobacteria   | Alphaproteobacteria | Rhizobiales                                        | <i>Rhodobiaceae</i>                   | <i>Parvibaculum</i>                                |
| NC_009720 | Proteobacteria   | Alphaproteobacteria | Rhizobiales                                        | <i>Xanthobacteraceae</i>              | <i>Xanthobacter</i>                                |
| NC_009937 | Proteobacteria   | Alphaproteobacteria | Rhizobiales                                        | <i>Xanthobacteraceae</i>              | <i>Azorhizobium</i>                                |
| NC_009952 | Proteobacteria   | Alphaproteobacteria | Rhodobacterales                                    | <i>Rhodobacteraceae</i>               | <i>Dinoroseobacter</i>                             |
| NC_010125 | Proteobacteria   | Alphaproteobacteria | Rhodospirillales                                   | <i>Acetobacteraceae</i>               | <i>Gluconacetobacter</i>                           |
| NC_010172 | Proteobacteria   | Alphaproteobacteria | Rhizobiales                                        | <i>Methylobacteriaceae</i>            | <i>Methylobacterium</i>                            |

|           |                |                       |                     |                      |                                    |                                             |
|-----------|----------------|-----------------------|---------------------|----------------------|------------------------------------|---------------------------------------------|
| NC_010581 | Proteobacteria | Alphaproteobacteria   | Rhizobiales         | Beijerinckiaceae     | <i>Beijerinckia</i>                | <i>Beijerinckia indica</i>                  |
| NC_011144 | Proteobacteria | Alphaproteobacteria   | Caulobacterales     | Caulobacteraceae     | <i>Phenylobacterium</i>            | <i>Phenylobacterium zucineum</i>            |
| NC_011386 | Proteobacteria | Alphaproteobacteria   | Rhizobiales         | Bradyrhizobiaceae    | <i>Oligotropha</i>                 | <i>Oligotropha carboxidovorans</i>          |
| NC_011666 | Proteobacteria | Alphaproteobacteria   | Rhizobiales         | Beijerinckiaceae     | <i>Methylocella</i>                | <i>Methylocella silvestris</i>              |
| NC_011985 | Proteobacteria | Alphaproteobacteria   | Rhizobiales         | Rhizobiaceae         | <i>Agrobacterium</i>               | <i>Agrobacterium tumefaciens</i>            |
| NC_012982 | Proteobacteria | Alphaproteobacteria   | Rhodobacterales     | Hyphomonadaceae      | <i>Hirschia</i>                    | <i>Hirschia baltica</i>                     |
| NC_012985 | Proteobacteria | Alphaproteobacteria   | Rhizobiales         | Rhizobiaceae         | <i>Candidatus Liberibacter</i>     | <i>Candidatus Liberibacter asiaticus</i>    |
| NC_013209 | Proteobacteria | Alphaproteobacteria   | Rhodospirillales    | Acetobacteraceae     | <i>Acetobacter</i>                 | <i>Acetobacter pasteurianus</i>             |
| NC_014006 | Proteobacteria | Alphaproteobacteria   | Sphingomonadales    | Sphingomonadaceae    | <i>Sphingobium</i>                 | <i>Sphingobium japonicum</i>                |
| NC_014010 | Proteobacteria | Alphaproteobacteria   | Unclassified        | Unclassified         | <i>Candidatus Puniceispirillum</i> | <i>Candidatus Puniceispirillum marinum</i>  |
| NC_014217 | Proteobacteria | Alphaproteobacteria   | Rhizobiales         | Xanthobacteraceae    | <i>Starkeya</i>                    | <i>Starkeya novella</i>                     |
| NC_014313 | Proteobacteria | Alphaproteobacteria   | Rhizobiales         | Hyphomicrobiaceae    | <i>Hyphomicrobium</i>              | <i>Hyphomicrobium denitrificans</i>         |
| NC_014375 | Proteobacteria | Alphaproteobacteria   | Caulobacterales     | Caulobacteraceae     | <i>Brevundimonas</i>               | <i>Brevundimonas subvirbroides</i>          |
| NC_014414 | Proteobacteria | Alphaproteobacteria   | Parvularculales     | Parvularculaceae     | <i>Parvularcula</i>                | <i>Parvularcula bermudensis</i>             |
| NC_014664 | Proteobacteria | Alphaproteobacteria   | Rhizobiales         | Hyphomicrobiaceae    | <i>Rhodomicrobium</i>              | <i>Rhodomicrobium vannielii</i>             |
| NC_002927 | Proteobacteria | Betaproteobacteria    | Burkholderiales     | Alcaligenaceae       | <i>Bordetella</i>                  | <i>Bordetella bronchiseptica</i>            |
| NC_002946 | Proteobacteria | Betaproteobacteria    | Neisseriales        | Neisseriaceae        | <i>Neisseria</i>                   | <i>Neisseria gonorrhoeae</i>                |
| NC_003295 | Proteobacteria | Betaproteobacteria    | Burkholderiales     | Burkholderiaceae     | <i>Ralstonia</i>                   | <i>Ralstonia solanacearum</i>               |
| NC_004757 | Proteobacteria | Betaproteobacteria    | Nitrosomonadales    | Nitrosomonadaceae    | <i>Nitrosomonas</i>                | <i>Nitrosomonas europaea</i>                |
| NC_005085 | Proteobacteria | Betaproteobacteria    | Neisseriales        | Neisseriaceae        | <i>Chromobacterium</i>             | <i>Chromobacterium violaceum</i>            |
| NC_006350 | Proteobacteria | Betaproteobacteria    | Burkholderiales     | Burkholderiaceae     | <i>Burkholderia</i>                | <i>Burkholderia pseudomallei</i>            |
| NC_006513 | Proteobacteria | Betaproteobacteria    | Rhodocyclales       | Rhodocyclaceae       | <i>Aromatoleum</i>                 | <i>Aromatoleum aromaticum</i>               |
| NC_007298 | Proteobacteria | Betaproteobacteria    | Rhodocyclales       | Rhodocyclaceae       | <i>Dechloromonas</i>               | <i>Dechloromonas aromatica</i>              |
| NC_007404 | Proteobacteria | Betaproteobacteria    | Hydrogenophilales   | Hydrogenophilaceae   | <i>Thiobacillus</i>                | <i>Thiobacillus denitrificans</i>           |
| NC_007614 | Proteobacteria | Betaproteobacteria    | Nitrosomonadales    | Nitrosomonadaceae    | <i>Nitrosospira</i>                | <i>Nitrosospira multififormis</i>           |
| NC_007908 | Proteobacteria | Betaproteobacteria    | Burkholderiales     | Comamonadaceae       | <i>Albidiferax</i>                 | <i>Albidiferax ferrireducens</i>            |
| NC_007947 | Proteobacteria | Betaproteobacteria    | Methylophilales     | Methylophilaceae     | <i>Methylobacillus</i>             | <i>Methylobacillus flagellatus</i>          |
| NC_007948 | Proteobacteria | Betaproteobacteria    | Burkholderiales     | Comamonadaceae       | <i>Polaromonas</i>                 | Unclassified                                |
| NC_007973 | Proteobacteria | Burkholderiales       | Burkholderiales     | Burkholderiaceae     | <i>Cupriavidus</i>                 | <i>Cupriavidus metallidurans</i>            |
| NC_008702 | Proteobacteria | Betaproteobacteria    | Rhodocyclales       | Rhodocyclaceae       | <i>Azoarcus</i>                    | Unclassified                                |
| NC_008752 | Proteobacteria | Betaproteobacteria    | Burkholderiales     | Comamonadaceae       | <i>Acidovorax</i>                  | <i>Acidovorax citrulli</i>                  |
| NC_008786 | Proteobacteria | Betaproteobacteria    | Burkholderiales     | Comamonadaceae       | <i>Verminephrobacter</i>           | <i>Verminephrobacter eiseniae</i>           |
| NC_008825 | Proteobacteria | Betaproteobacteria    | Burkholderiales     | Unclassified         | <i>Methylibium</i>                 | <i>Methylibium petroleiphilum</i>           |
| NC_009379 | Proteobacteria | Betaproteobacteria    | Burkholderiales     | Burkholderiaceae     | <i>Polynucleobacter</i>            | <i>Polynucleobacter necessarius</i>         |
| NC_010002 | Proteobacteria | Betaproteobacteria    | Burkholderiales     | Comamonadaceae       | <i>Delftia</i>                     | <i>Delftia acidovorans</i>                  |
| NC_010524 | Proteobacteria | Betaproteobacteria    | Burkholderiales     | Unclassified         | <i>Leptothrix</i>                  | <i>Leptothrix cholodnii</i>                 |
| NC_011662 | Proteobacteria | Betaproteobacteria    | Rhodocyclales       | Rhodocyclaceae       | <i>Thaueria</i>                    | Unclassified                                |
| NC_012559 | Proteobacteria | Betaproteobacteria    | Neisseriales        | Neisseriaceae        | <i>Laribacter</i>                  | <i>Laribacter hongkongensis</i>             |
| NC_012791 | Proteobacteria | Betaproteobacteria    | Burkholderiales     | Comamonadaceae       | <i>Variovorax</i>                  | <i>Variovorax paradoxus</i>                 |
| NC_012968 | Proteobacteria | Betaproteobacteria    | Methylophilales     | Methylophilaceae     | <i>Methylothera</i>                | <i>Methylothera mobilis</i>                 |
| NC_012969 | Proteobacteria | Betaproteobacteria    | Methylophilales     | Methylophilaceae     | <i>Methylovorus</i>                | <i>Methylovorus glucosotrophus</i>          |
| NC_013194 | Proteobacteria | Betaproteobacteria    | Unclassified        | Unclassified         | <i>Candidatus Accumulibacter</i>   | <i>Candidatus Accumulibacter phosphatis</i> |
| NC_013446 | Proteobacteria | Betaproteobacteria    | Burkholderiales     | Comamonadaceae       | <i>Comamonas</i>                   | <i>Comamonas testosteroni</i>               |
| NC_013959 | Proteobacteria | Betaproteobacteria    | Gallionellales      | Gallionellaceae      | <i>Sideroxydans</i>                | <i>Sideroxydans lithotrophicus</i>          |
| NC_014153 | Proteobacteria | Betaproteobacteria    | Burkholderiales     | Unclassified         | <i>Thiomonas</i>                   | <i>Thiomonas intermedia</i>                 |
| NC_014323 | Proteobacteria | Betaproteobacteria    | Burkholderiales     | Oxalobacteraceae     | <i>Herbaspirillum</i>              | <i>Herbaspirillum seropedicaceae</i>        |
| NC_014394 | Proteobacteria | Betaproteobacteria    | Gallionellales      | Gallionellaceae      | <i>Gallionella</i>                 | <i>Gallionella capsijerriformans</i>        |
| NC_014640 | Proteobacteria | Betaproteobacteria    | Burkholderiales     | Alcaligenaceae       | <i>Achromobacter</i>               | <i>Achromobacter xylosoxidans</i>           |
| NC_014910 | Proteobacteria | Betaproteobacteria    | Burkholderiales     | Comamonadaceae       | <i>Alicyciphilus</i>               | <i>Alicyciphilus denitrificans</i>          |
| NC_014914 | Proteobacteria | Betaproteobacteria    | Burkholderiales     | Alcaligenaceae       | <i>Taylorella</i>                  | <i>Taylorella equigenitalis</i>             |
| NC_015458 | Proteobacteria | Betaproteobacteria    | Burkholderiales     | Alcaligenaceae       | <i>Pusillimonas</i>                | Unclassified                                |
| NC_015677 | Proteobacteria | Betaproteobacteria    | Burkholderiales     | Comamonadaceae       | <i>Ramlibacter</i>                 | <i>Ramlibacter tataouinensis</i>            |
| NC_015856 | Proteobacteria | Betaproteobacteria    | Burkholderiales     | Oxalobacteraceae     | <i>Collimonas</i>                  | <i>Collimonas fungivorans</i>               |
| NC_016002 | Proteobacteria | Betaproteobacteria    | Neisseriales        | Neisseriaceae        | <i>Pseudogulbenkiana</i>           | Unclassified                                |
| NC_002937 | Proteobacteria | Deltaproteobacteria   | Desulfuovibrionales | Desulfuovibrionaceae | <i>Desulfovibrio</i>               | <i>Desulfovibrio vulgaris</i>               |
| NC_002939 | Proteobacteria | Deltaproteobacteria   | Desulfuromonadales  | Geobacteraceae       | <i>Geobacter</i>                   | <i>Geobacter sulfurreducens</i>             |
| NC_005363 | Proteobacteria | Deltaproteobacteria   | Bdellovibrionales   | Bdellovibrionaceae   | <i>Bdellovibrio</i>                | <i>Bdellovibrio bacteriovorus</i>           |
| NC_007498 | Proteobacteria | Deltaproteobacteria   | Desulfuromonadales  | Pelobacteraceae      | <i>Pelobacter</i>                  | <i>Pelobacter carbinolicus</i>              |
| NC_007759 | Proteobacteria | Deltaproteobacteria   | Syntrophobacterales | Syntrophaceae        | <i>Syntrophus</i>                  | <i>Syntrophus aciditrophicus</i>            |
| NC_007760 | Proteobacteria | Deltaproteobacteria   | Myxococcales        | Myxococcaceae        | <i>Anaeromyxobacter</i>            | <i>Anaeromyxobacter dehalogenans</i>        |
| NC_008011 | Proteobacteria | Deltaproteobacteria   | Desulfuovibrionales | Desulfuovibrionaceae | <i>Lawsonia</i>                    | <i>Lawsonia intracellularis</i>             |
| NC_008095 | Proteobacteria | Deltaproteobacteria   | Myxococcales        | Myxococcaceae        | <i>Myxococcus</i>                  | <i>Myxococcus xanthus</i>                   |
| NC_008554 | Proteobacteria | Deltaproteobacteria   | Syntrophobacterales | Syntrophobacteraceae | <i>Syntrophobacter</i>             | <i>Syntrophobacter fumaroxidans</i>         |
| NC_009943 | Proteobacteria | Deltaproteobacteria   | Desulfobacterales   | Desulfobacteraceae   | <i>Desulfococcus</i>               | <i>Desulfococcus oleovorans</i>             |
| NC_010162 | Proteobacteria | Deltaproteobacteria   | Myxococcales        | Polyangiaceae        | <i>Sorangium</i>                   | <i>Sorangium cellulosum</i>                 |
| NC_011768 | Proteobacteria | Deltaproteobacteria   | Desulfobacterales   | Desulfobacteraceae   | <i>Desulfatibacillum</i>           | <i>Desulfatibacillum alkenivorans</i>       |
| NC_012108 | Proteobacteria | Deltaproteobacteria   | Desulfobacterales   | Desulfobacteraceae   | <i>Desulfobacterium</i>            | <i>Desulfobacterium autotrophicum</i>       |
| NC_013173 | Proteobacteria | Deltaproteobacteria   | Desulfuovibrionales | Desulfomicrobiaceae  | <i>Desulfomicrobium</i>            | <i>Desulfomicrobium baculatum</i>           |
| NC_013223 | Proteobacteria | Deltaproteobacteria   | Desulfuovibrionales | Desulfohalobiaceae   | <i>Desulfohalobium</i>             | <i>Desulfohalobium retbaense</i>            |
| NC_013440 | Proteobacteria | Deltaproteobacteria   | Myxococcales        | Koffleriaceae        | <i>Haliangium</i>                  | <i>Haliangium ochraceum</i>                 |
| NC_014216 | Proteobacteria | Deltaproteobacteria   | Desulfobacterales   | Desulfobulbaceae     | <i>Desulfurivibrio</i>             | <i>Desulfurivibrio alkaliphilus</i>         |
| NC_014365 | Proteobacteria | Deltaproteobacteria   | Desulfurculales     | Desulfurculaceae     | <i>Desulfurculus</i>               | <i>Desulfurculus baarsii</i>                |
| NC_014972 | Proteobacteria | Deltaproteobacteria   | Desulfobacterales   | Desulfobulbaceae     | <i>Desulfobulbus</i>               | <i>Desulfobulbus propionicus</i>            |
| NC_015318 | Proteobacteria | Deltaproteobacteria   | Desulfurellales     | Desulfurellaceae     | <i>Hippea</i>                      | <i>Hippea maritima</i>                      |
| NC_015388 | Proteobacteria | Deltaproteobacteria   | Syntrophobacterales | Syntrophaceae        | <i>Desulfobacca</i>                | <i>Desulfobacca acetoxidans</i>             |
| NC_002163 | Proteobacteria | Epsilonproteobacteria | Campylobacterales   | Campylobacteraceae   | <i>Campylobacter</i>               | <i>Campylobacter jejuni</i>                 |
| NC_007575 | Proteobacteria | Epsilonproteobacteria | Campylobacterales   | Helicobacteraceae    | <i>Sulfurimonas</i>                | <i>Sulfurimonas denitrificans</i>           |
| NC_009662 | Proteobacteria | Epsilonproteobacteria | Unclassified        | Unclassified         | <i>Nitratiruptor</i>               | Unclassified                                |
| NC_009663 | Proteobacteria | Epsilonproteobacteria | Unclassified        | Unclassified         | <i>Sulfurovum</i>                  | Unclassified                                |
| NC_009850 | Proteobacteria | Epsilonproteobacteria | Campylobacterales   | Campylobacteraceae   | <i>Arcobacter</i>                  | <i>Arcobacter butzleri</i>                  |
| NC_011333 | Proteobacteria | Epsilonproteobacteria | Campylobacterales   | Helicobacteraceae    | <i>Helicobacter</i>                | <i>Helicobacter pylori</i>                  |
| NC_012115 | Proteobacteria | Epsilonproteobacteria | Nautiliales         | Nautiliaceae         | <i>Nautilia</i>                    | <i>Nautilia profundicola</i>                |
| NC_013512 | Proteobacteria | Epsilonproteobacteria | Campylobacterales   | Campylobacteraceae   | <i>Sulfurospirillum</i>            | <i>Sulfurospirillum deleyianum</i>          |
| NC_014762 | Proteobacteria | Epsilonproteobacteria | Campylobacterales   | Helicobacteraceae    | <i>Sulfuricurvum</i>               | <i>Sulfuricurvum kujiensae</i>              |
| NC_014935 | Proteobacteria | Epsilonproteobacteria | Campylobacterales   | Unclassified         | <i>Nitratifactor</i>               | <i>Nitratifactor salsuginis</i>             |
| NC_000907 | Proteobacteria | Gammaproteobacteria   | Pasteurellales      | Pasteurellaceae      | <i>Haemophilus</i>                 | <i>Haemophilus influenzae</i>               |
| NC_000913 | Proteobacteria | Gammaproteobacteria   | Enterobacterales    | Enterobacteriaceae   | <i>Escherichia</i>                 | <i>Escherichia coli</i>                     |
| NC_002488 | Proteobacteria | Gammaproteobacteria   | Xanthomonadales     | Xanthomonadaceae     | <i>Xylella</i>                     | <i>Xylella fastidiosa</i>                   |
| NC_002516 | Proteobacteria | Gammaproteobacteria   | Pseudomonadales     | Pseudomonadaceae     | <i>Pseudomonas</i>                 | <i>Pseudomonas aeruginosa</i>               |
| NC_002528 | Proteobacteria | Gammaproteobacteria   | Enterobacterales    | Enterobacteriaceae   | <i>Buchnera</i>                    | <i>Buchnera aphidicola</i>                  |

|           |                       |                       |                          |                           |                                |                                           |
|-----------|-----------------------|-----------------------|--------------------------|---------------------------|--------------------------------|-------------------------------------------|
| NC_002663 | Proteobacteria        | Gammaproteobacteria   | Pasteurellales           | Pasteurellaceae           | <i>Pasteurella</i>             | <i>Pasteurella multocida</i>              |
| NC_002971 | Proteobacteria        | Gammaproteobacteria   | Legionellales            | Coxiellaceae              | <i>Coxiella</i>                | <i>Coxiella burnetii</i>                  |
| NC_003143 | Proteobacteria        | Gammaproteobacteria   | Enterobacteriales        | Enterobacteriaceae        | <i>Yersinia</i>                | <i>Yersinia pestis</i>                    |
| NC_003197 | Proteobacteria        | Gammaproteobacteria   | Enterobacteriales        | Enterobacteriaceae        | <i>Salmonella</i>              | <i>Salmonella enterica</i>                |
| NC_003902 | Proteobacteria        | Gammaproteobacteria   | Xanthomonadales          | Xanthomonadaceae          | <i>Xanthomonas</i>             | <i>Xanthomonas campestris</i>             |
| NC_003910 | Proteobacteria        | Gammaproteobacteria   | Alteromonadales          | Colwelliaceae             | <i>Colwellia</i>               | <i>Colwellia psycherythraea</i>           |
| NC_004337 | Proteobacteria        | Gammaproteobacteria   | Enterobacteriales        | Enterobacteriaceae        | <i>Shigella</i>                | <i>Shigella flexneri</i>                  |
| NC_004344 | Proteobacteria        | Gammaproteobacteria   | Enterobacteriales        | Enterobacteriaceae        | <i>Wigglesworthia</i>          | <i>Wigglesworthia glossinidia</i>         |
| NC_004347 | Proteobacteria        | Gammaproteobacteria   | Alteromonadales          | Shewanellaceae            | <i>Shewanella</i>              | <i>Shewanella oneidensis</i>              |
| NC_004459 | Proteobacteria        | Gammaproteobacteria   | Vibrionales              | Vibrionaceae              | <i>Vibrio</i>                  | <i>Vibrio vulnificus</i>                  |
| NC_004547 | Proteobacteria        | Gammaproteobacteria   | Enterobacteriales        | Enterobacteriaceae        | <i>Pectobacterium</i>          | <i>Pectobacterium atrosepticum</i>        |
| NC_005061 | Proteobacteria        | Gammaproteobacteria   | Enterobacteriales        | Enterobacteriaceae        | <i>Candidatus Blochmannia</i>  | Unclassified                              |
| NC_005126 | Proteobacteria        | Gammaproteobacteria   | Enterobacteriales        | Enterobacteriaceae        | <i>Photorhabdus</i>            | <i>Photorhabdus luminescens</i>           |
| NC_005966 | Proteobacteria        | Gammaproteobacteria   | Pseudomonadales          | Moraxellaceae             | <i>Acinetobacter</i>           | Unclassified                              |
| NC_006300 | Proteobacteria        | Gammaproteobacteria   | Pasteurellales           | Pasteurellaceae           | <i>Basfia</i>                  | <i>Mannheimia succiniciproduens</i>       |
| NC_006368 | Proteobacteria        | Gammaproteobacteria   | Legionellales            | Legionellaceae            | <i>Legionella</i>              | <i>Legionella pneumophila</i>             |
| NC_006370 | Proteobacteria        | Gammaproteobacteria   | Vibrionales              | Vibrionaceae              | <i>Photobacterium</i>          | <i>Photobacterium profundum</i>           |
| NC_006512 | Proteobacteria        | Gammaproteobacteria   | Alteromonadales          | Idiomarinaceae            | <i>Idiomarina</i>              | <i>Idiomarina loihiensis</i>              |
| NC_006570 | Proteobacteria        | Gammaproteobacteria   | Thiotrichales            | Francisellaceae           | <i>Francisella</i>             | <i>Francisella tularensis</i>             |
| NC_006840 | Proteobacteria        | Gammaproteobacteria   | Vibrionales              | Vibrionaceae              | <i>Aliivibrio</i>              | <i>Aliivibrio fischeri</i>                |
| NC_007204 | Proteobacteria        | Gammaproteobacteria   | Pseudomonadales          | Moraxellaceae             | <i>Psychrobacter</i>           | <i>Psychrobacter arcticus</i>             |
| NC_007481 | Proteobacteria        | Gammaproteobacteria   | Alteromonadales          | Pseudoalteromonadaceae    | <i>Pseudoalteromonas</i>       | <i>Pseudoalteromonas haloplanktis</i>     |
| NC_007484 | Proteobacteria        | Gammaproteobacteria   | Chromatiales             | Chromatiaceae             | <i>Nitrosococcus</i>           | <i>Nitrosococcus oceanii</i>              |
| NC_007520 | Proteobacteria        | Gammaproteobacteria   | Thiotrichales            | Piscirickettsiaceae       | <i>Thiomicrospira</i>          | <i>Thiomicrospira crunigena</i>           |
| NC_007645 | Proteobacteria        | Gammaproteobacteria   | Oceanospirillales        | Hahellaceae               | <i>Hahella</i>                 | <i>Hahella chejuensis</i>                 |
| NC_007912 | Proteobacteria        | Gammaproteobacteria   | Alteromonadales          | Alteromonadaceae          | <i>Saccharophagus</i>          | <i>Saccharophagus degradans</i>           |
| NC_007963 | Proteobacteria        | Gammaproteobacteria   | Oceanospirillales        | Halomonadaceae            | <i>Chromohalobacter</i>        | <i>Chromohalobacter salexigens</i>        |
| NC_008260 | Proteobacteria        | Gammaproteobacteria   | Oceanospirillales        | Alcanivoraceae            | <i>Alcanivorax</i>             | <i>Alcanivorax borkumensis</i>            |
| NC_008309 | Proteobacteria        | Gammaproteobacteria   | Pasteurellales           | Pasteurellaceae           | <i>Histophilus</i>             | <i>Histophilus somni</i>                  |
| NC_008340 | Proteobacteria        | Gammaproteobacteria   | Chromatiales             | Ecotriorhodospiraceae     | <i>Alkalilimnicola</i>         | <i>Alkalilimnicola ehrlichii</i>          |
| NC_008570 | Proteobacteria        | Gammaproteobacteria   | Aeromonadales            | Aeromonadaceae            | <i>Aeromonas</i>               | <i>Aeromonas hydrophila</i>               |
| NC_008709 | Proteobacteria        | Gammaproteobacteria   | Alteromonadales          | Psychromonadaceae         | <i>Psychromonas</i>            | <i>Psychromonas ingrahamii</i>            |
| NC_008740 | Proteobacteria        | Gammaproteobacteria   | Alteromonadales          | Alteromonadaceae          | <i>Marinobacter</i>            | <i>Marinobacter hydrocarbonoclasticus</i> |
| NC_008789 | Proteobacteria        | Gammaproteobacteria   | Chromatiales             | Ecotriorhodospiraceae     | <i>Halorhodospira</i>          | <i>Halorhodospira halophila</i>           |
| NC_009053 | Proteobacteria        | Gammaproteobacteria   | Pasteurellales           | Pasteurellaceae           | <i>Actinobacillus</i>          | <i>Actinobacillus pleuropneumoniae</i>    |
| NC_009436 | Proteobacteria        | Gammaproteobacteria   | Enterobacteriales        | Enterobacteriaceae        | <i>Enterobacter</i>            | Unclassified                              |
| NC_009648 | Proteobacteria        | Gammaproteobacteria   | Enterobacteriales        | Enterobacteriaceae        | <i>Klebsiella</i>              | <i>Klebsiella pneumoniae</i>              |
| NC_009654 | Proteobacteria        | Gammaproteobacteria   | Oceanospirillales        | Oceanospirillaceae        | <i>Marinomonas</i>             | Unclassified                              |
| NC_009778 | Proteobacteria        | Gammaproteobacteria   | Enterobacteriales        | Enterobacteriaceae        | <i>Cronobacter</i>             | <i>Cronobacter sakazakii</i>              |
| NC_009792 | Proteobacteria        | Gammaproteobacteria   | Enterobacteriales        | Enterobacteriaceae        | <i>Citrobacter</i>             | <i>Citrobacter koseri</i>                 |
| NC_009832 | Proteobacteria        | Gammaproteobacteria   | Enterobacteriales        | Enterobacteriaceae        | <i>Serratia</i>                | <i>Serratia proteamaculans</i>            |
| NC_010554 | Proteobacteria        | Gammaproteobacteria   | Enterobacteriales        | Enterobacteriaceae        | <i>Proteus</i>                 | <i>Proteus mirabilis</i>                  |
| NC_010694 | Proteobacteria        | Gammaproteobacteria   | Enterobacteriales        | Enterobacteriaceae        | <i>Erwinia</i>                 | <i>Erwinia tasmaniensis</i>               |
| NC_010943 | Proteobacteria        | Gammaproteobacteria   | Xanthomonadales          | Xanthomonadaceae          | <i>Stenotrophomonas</i>        | <i>Stenotrophomonas maltophilia</i>       |
| NC_010995 | Proteobacteria        | Gammaproteobacteria   | Pseudomonadales          | Pseudomonadaceae          | <i>Cellvibrio</i>              | <i>Cellvibrio japonicus</i>               |
| NC_011206 | Proteobacteria        | Gammaproteobacteria   | Acidithiobacillales      | Acidithiobacillaceae      | <i>Acidithiobacillus</i>       | <i>Acidithiobacillus ferrooxidans</i>     |
| NC_012560 | Proteobacteria        | Gammaproteobacteria   | Pseudomonadales          | Pseudomonadaceae          | <i>Azotobacter</i>             | <i>Azotobacter vinelandii</i>             |
| NC_012691 | Proteobacteria        | Gammaproteobacteria   | Aeromonadales            | Aeromonadaceae            | <i>Tolumonas</i>               | <i>Tolumonas auensis</i>                  |
| NC_012751 | Proteobacteria        | Gammaproteobacteria   | Enterobacteriales        | Enterobacteriaceae        | <i>Candidatus Hamiltonella</i> | <i>Candidatus Hamiltonella defensa</i>    |
| NC_012880 | Proteobacteria        | Gammaproteobacteria   | Enterobacteriales        | Enterobacteriaceae        | <i>Dickeya</i>                 | <i>Dickeya dadantii</i>                   |
| NC_012913 | Proteobacteria        | Gammaproteobacteria   | Pasteurellales           | Pasteurellaceae           | <i>Aggregatibacter</i>         | <i>Aggregatibacter aphrophilus</i>        |
| NC_012997 | Proteobacteria        | Gammaproteobacteria   | Alteromonadales          | Unclassified              | <i>Teredinibacter</i>          | <i>Teredinibacter turnerae</i>            |
| NC_013166 | Proteobacteria        | Gammaproteobacteria   | Oceanospirillales        | Alcanivoraceae            | <i>Kangiella</i>               | <i>Kangiella korensis</i>                 |
| NC_013422 | Proteobacteria        | Gammaproteobacteria   | Chromatiales             | Halothiobacillaceae       | <i>Halothiobacillus</i>        | <i>Halothiobacillus neapolitanus</i>      |
| NC_013851 | Proteobacteria        | Gammaproteobacteria   | Chromatiales             | Chromatiaceae             | <i>Allochroamatium</i>         | <i>Allochroamatium vinosum</i>            |
| NC_013889 | Proteobacteria        | Gammaproteobacteria   | Chromatiales             | Ecotriorhodospiraceae     | <i>Thioalkalivibrio</i>        | Unclassified                              |
| NC_013892 | Proteobacteria        | Gammaproteobacteria   | Enterobacteriales        | Enterobacteriaceae        | <i>Xenorhabdus</i>             | <i>Xenorhabdus bovienii</i>               |
| NC_013956 | Proteobacteria        | Gammaproteobacteria   | Enterobacteriales        | Enterobacteriaceae        | <i>Pantoea</i>                 | <i>Pantoea ananatis</i>                   |
| NC_014109 | Proteobacteria        | Gammaproteobacteria   | Enterobacteriales        | Enterobacteriaceae        | <i>Candidatus Riesia</i>       | <i>Candidatus Riesia pediculicola</i>     |
| NC_014147 | Proteobacteria        | Gammaproteobacteria   | Pseudomonadales          | Moraxellaceae             | <i>Moraxella</i>               | <i>Moraxella catarrhalis</i>              |
| NC_014532 | Proteobacteria        | Gammaproteobacteria   | Oceanospirillales        | Halomonadaceae            | <i>Halomonas</i>               | <i>Halomonas elongata</i>                 |
| NC_014541 | Proteobacteria        | Gammaproteobacteria   | Alteromonadales          | Ferrimonadaceae           | <i>Ferrimonas</i>              | <i>Ferrimonas balearica</i>               |
| NC_014924 | Proteobacteria        | Gammaproteobacteria   | Xanthomonadales          | Xanthomonadaceae          | <i>Pseudoxanthomonas</i>       | <i>Pseudoxanthomonas suwonensis</i>       |
| NC_015061 | Proteobacteria        | Gammaproteobacteria   | Enterobacteriales        | Enterobacteriaceae        | <i>Rahnella</i>                | Unclassified                              |
| NC_015460 | Proteobacteria        | Gammaproteobacteria   | Pasteurellales           | Pasteurellaceae           | <i>Gallibacterium</i>          | <i>Gallibacterium anatis</i>              |
| NC_015497 | Proteobacteria        | Gammaproteobacteria   | Alteromonadales          | Alteromonadaceae          | <i>Glaciicola</i>              | Unclassified                              |
| NC_015554 | Proteobacteria        | Gammaproteobacteria   | Alteromonadales          | Alteromonadaceae          | <i>Alteromonas</i>             | Unclassified                              |
| NC_015572 | Proteobacteria        | Gammaproteobacteria   | Methylococcales          | Methylococcaceae          | <i>Methylomonas</i>            | <i>Methylomonas methanica</i>             |
| NC_015581 | Proteobacteria        | Gammaproteobacteria   | Thiotrichales            | Piscirickettsiaceae       | <i>Thioalkalimicrobium</i>     | <i>Thioalkalimicrobium cyclicum</i>       |
| NC_015735 | Proteobacteria        | Gammaproteobacteria   | Enterobacteriales        | Enterobacteriaceae        | <i>Candidatus Moranella</i>    | <i>Candidatus Moranella endobia</i>       |
| NC_000919 | Spirochaetes          | Spirochaetia          | Spirochaetales           | Spirochaetaceae           | <i>Treponema</i>               | <i>Treponema pallidum</i>                 |
| NC_001318 | Spirochaetes          | Spirochaetia          | Spirochaetales           | Spirochaetaceae           | <i>Borrelia</i>                | <i>Borrelia burgdorferi</i>               |
| NC_004342 | Spirochaetes          | Spirochaetia          | Spirochaetales           | Leptospiraceae            | <i>Leptospira</i>              | <i>Leptospira interrogans</i>             |
| NC_012225 | Spirochaetes          | Spirochaetia          | Spirochaetales           | Brachyspiraceae           | <i>Brachyspira</i>             | <i>Brachyspira hyodysenteriae</i>         |
| NC_014364 | Spirochaetes          | Spirochaetia          | Spirochaetales           | Spirochaetaceae           | <i>Spirochaeta</i>             | <i>Spirochaeta smaragdinae</i>            |
| NC_015152 | Spirochaetes          | Spirochaetia          | Spirochaetales           | Spirochaetaceae           | <i>Sphaerochaeta</i>           | <i>Sphaerochaeta globosa</i>              |
| NC_013522 | Synergistetes         | Synergistia           | Synergistales            | Synergistaceae            | <i>Thermanaerovibrio</i>       | <i>Thermanaerovibrio acidaminovorans</i>  |
| NC_014011 | Synergistetes         | Synergistia           | Synergistales            | Synergistaceae            | <i>Aminobacterium</i>          | <i>Aminobacterium colombiense</i>         |
| NC_000908 | Tenericutes           | Mollicutes            | Mycoplasmatales          | Mycoplasmataceae          | <i>Mycoplasma</i>              | <i>Mycoplasma genitalium</i>              |
| NC_002162 | Tenericutes           | Mollicutes            | Mycoplasmatales          | Mycoplasmataceae          | <i>Ureaplasma</i>              | <i>Ureaplasma parvum</i>                  |
| NC_005303 | Tenericutes           | Mollicutes            | Acholeplasmatales        | Acholeplasmataceae        | <i>Candidatus Phytoplasma</i>  | <i>Onion yellows phytoplasma</i>          |
| NC_006055 | Tenericutes           | Mollicutes            | Entomoplasmatales        | Entomoplasmataceae        | <i>Mesoplasma</i>              | <i>Mesoplasma florum</i>                  |
| NC_010163 | Tenericutes           | Mollicutes            | Acholeplasmatales        | Acholeplasmataceae        | <i>Acholeplasma</i>            | <i>Acholeplasma laidlawii</i>             |
| NC_015681 | Thermodesulfobacteria | Thermodesulfobacteria | Thermodesulfobacteriales | Thermodesulfobacteriaceae | <i>Thermodesulfator</i>        | <i>Thermodesulfator indicus</i>           |
| NC_015682 | Thermodesulfobacteria | Thermodesulfobacteria | Thermodesulfobacteriales | Thermodesulfobacteriaceae | <i>Thermodesulfobacterium</i>  | <i>Thermodesulfobacterium geofontis</i>   |
| NC_000853 | Thermotogae           | Thermotogae           | Thermotogales            | Thermotogaceae            | <i>Thermotoga</i>              | <i>Thermotoga maritima</i>                |
| NC_009616 | Thermotogae           | Thermotogae           | Thermotogales            | Thermotogaceae            | <i>Thermosipho</i>             | <i>Thermosipho melanesiensis</i>          |
| NC_009718 | Thermotogae           | Thermotogae           | Thermotogales            | Thermotogaceae            | <i>Fervidobacterium</i>        | <i>Fervidobacterium nodosum</i>           |
| NC_010003 | Thermotogae           | Thermotogae           | Thermotogales            | Thermotogaceae            | <i>Petrotoga</i>               | <i>Petrotoga mobilis</i>                  |
| NC_012785 | Thermotogae           | Thermotogae           | Thermotogales            | Thermotogaceae            | <i>Kosmotoga</i>               | <i>Kosmotoga olearia</i>                  |

|           |                 |                  |                     |                      |                          |                                     |
|-----------|-----------------|------------------|---------------------|----------------------|--------------------------|-------------------------------------|
| NC_013525 | Unclassified    | Unclassified     | Unclassified        | Unclassified         | <i>Thermobaculum</i>     | <i>Thermobaculum terrenum</i>       |
| NC_010571 | Verrucomicrobia | Opiritae         | Unclassified        | Opiritaceae          | <i>Opiritus</i>          | <i>Opiritus terrae</i>              |
| NC_014008 | Verrucomicrobia | Opiritae         | Puniceococcales     | Puniceococcaceae     | <i>Coraliomargarita</i>  | <i>Coraliomargarita akajimensis</i> |
| NC_010794 | Verrucomicrobia | Unclassified     | Methylacidiphilales | Methylacidiphilaceae | <i>Methylacidiphilum</i> | <i>Methylacidiphilum infernorum</i> |
| NC_010655 | Verrucomicrobia | Verrucomicrobiae | Verrucomicrobiales  | Verrucomicrobiaceae  | <i>Akkermansia</i>       | <i>Akkermansia muciniphila</i>      |

---

**Table S4. List of genes used in building the tree of bacteria**

| PID      | Gene        | Locus tag* | COG      | Predicted product                        | Position*        | Length (bp)* |
|----------|-------------|------------|----------|------------------------------------------|------------------|--------------|
| 90961179 | <i>rpoB</i> | LSL_0197   | COG0085K | DNA-directed RNA polymerase subunit beta | 235025..238624   | 3600         |
| 90961471 | <i>infC</i> | LSL_0495   | COG0290J | translation initiation factor IF-3       | 545916..546440   | 525          |
| 90961487 | <i>rpsB</i> | LSL_0511   | COG0052J | 30S ribosomal protein S2                 | 557234..558031   | 798          |
| 90961488 | <i>tsf</i>  | LSL_0512   | COG0264J | elongation factor Ts                     | 558125..559000   | 876          |
| 90961538 | <i>frr</i>  | LSL_0562   | COG0233J | ribosome recycling factor                | 600955..601518   | 564          |
| 90961545 | <i>nusA</i> | LSL_0569   | COG0195K | transcription elongation factor NusA     | 611433..612560   | 1128         |
| 90962130 | <i>smpB</i> | LSL_1155   | COG0691O | SsrA-binding protein                     | 1187273..1187740 | 468          |
| 90962374 | <i>rplM</i> | LSL_1403   | COG0102J | 50S ribosomal protein L13                | 1478312..1478755 | 444          |
| 90962389 | <i>rpsE</i> | LSL_1418   | COG0098J | 30S ribosomal protein S5                 | 1488030..1488530 | 501          |
| 90962391 | <i>rplF</i> | LSL_1420   | COG0097J | 50S ribosomal protein L6                 | 1488953..1489489 | 537          |
| 90962394 | <i>rplE</i> | LSL_1423   | COG0094J | 50S ribosomal protein L5                 | 1490153..1490695 | 543          |
| 90962399 | <i>rplP</i> | LSL_1428   | COG0197J | 50S ribosomal protein L16                | 1491964..1492398 | 435          |
| 90962400 | <i>rpsC</i> | LSL_1429   | COG0092J | 30S ribosomal protein S3                 | 1492402..1493058 | 657          |
| 90962403 | <i>rplB</i> | LSL_1432   | COG0090J | 50S ribosomal protein L2                 | 1493766..1494599 | 834          |
| 90962405 | <i>rplD</i> | LSL_1434   | COG0088J | 50S ribosomal protein L4                 | 1494909..1495532 | 624          |
| 90962406 | <i>rplC</i> | LSL_1435   | COG0087J | 50S ribosomal protein L3                 | 1495557..1496180 | 624          |

\*These columns are provided according to the reference genome *L. salivarius* UCC118

Table S5. Distribution of LPMXTG-containing and sortase enzymes across the 213 genomes

| Species Name                                     | StrainID     | Prdms with LPMXTG motif | LPMXTG gene IDs                                                                                                                                                                                                                                                                                                                                                                                                                                                                                                                                                                                                                                                                                                                                                                                                                                                                                                                                                                                                                                                                                                                                                                                                                                                                                                                                                                                                                                                                                                                                                                                                                                                                                                                                                                                                                                                                                                                                                                                                                                                                                                                                                                                                                                                                                                                                                                                                                                                                                                                                                                                                                                                                                                                                                                                                                                                                                                                                                                                                                                                                                                                                                                                                                                                                                                                                                                                                                                                                                                                                                                                                                                                                                                                                                                                                                                                                                                                                                                                                                                                                                                                                                                                                                                                                                                                                                                                                                                                                                                                                                                                                                                                                                                                                                                                                                                                                                                                                                                                                                                                                                                                                                                                                                                                                                                                                                                                                                                                                                                                       | Sortase enzyme count | Sortase gene IDs                                                                                                                                                                                           | Initial LOCP output | Plus-positive strain* | Number of clusters | Locus tags                      |
|--------------------------------------------------|--------------|-------------------------|---------------------------------------------------------------------------------------------------------------------------------------------------------------------------------------------------------------------------------------------------------------------------------------------------------------------------------------------------------------------------------------------------------------------------------------------------------------------------------------------------------------------------------------------------------------------------------------------------------------------------------------------------------------------------------------------------------------------------------------------------------------------------------------------------------------------------------------------------------------------------------------------------------------------------------------------------------------------------------------------------------------------------------------------------------------------------------------------------------------------------------------------------------------------------------------------------------------------------------------------------------------------------------------------------------------------------------------------------------------------------------------------------------------------------------------------------------------------------------------------------------------------------------------------------------------------------------------------------------------------------------------------------------------------------------------------------------------------------------------------------------------------------------------------------------------------------------------------------------------------------------------------------------------------------------------------------------------------------------------------------------------------------------------------------------------------------------------------------------------------------------------------------------------------------------------------------------------------------------------------------------------------------------------------------------------------------------------------------------------------------------------------------------------------------------------------------------------------------------------------------------------------------------------------------------------------------------------------------------------------------------------------------------------------------------------------------------------------------------------------------------------------------------------------------------------------------------------------------------------------------------------------------------------------------------------------------------------------------------------------------------------------------------------------------------------------------------------------------------------------------------------------------------------------------------------------------------------------------------------------------------------------------------------------------------------------------------------------------------------------------------------------------------------------------------------------------------------------------------------------------------------------------------------------------------------------------------------------------------------------------------------------------------------------------------------------------------------------------------------------------------------------------------------------------------------------------------------------------------------------------------------------------------------------------------------------------------------------------------------------------------------------------------------------------------------------------------------------------------------------------------------------------------------------------------------------------------------------------------------------------------------------------------------------------------------------------------------------------------------------------------------------------------------------------------------------------------------------------------------------------------------------------------------------------------------------------------------------------------------------------------------------------------------------------------------------------------------------------------------------------------------------------------------------------------------------------------------------------------------------------------------------------------------------------------------------------------------------------------------------------------------------------------------------------------------------------------------------------------------------------------------------------------------------------------------------------------------------------------------------------------------------------------------------------------------------------------------------------------------------------------------------------------------------------------------------------------------------------------------------------------------------------------------|----------------------|------------------------------------------------------------------------------------------------------------------------------------------------------------------------------------------------------------|---------------------|-----------------------|--------------------|---------------------------------|
| <i>Kandelia virens</i>                           | DSM 20438    | 4                       | DSM_20438G00656, DSM_20438G00657, DSM_20438G00658                                                                                                                                                                                                                                                                                                                                                                                                                                                                                                                                                                                                                                                                                                                                                                                                                                                                                                                                                                                                                                                                                                                                                                                                                                                                                                                                                                                                                                                                                                                                                                                                                                                                                                                                                                                                                                                                                                                                                                                                                                                                                                                                                                                                                                                                                                                                                                                                                                                                                                                                                                                                                                                                                                                                                                                                                                                                                                                                                                                                                                                                                                                                                                                                                                                                                                                                                                                                                                                                                                                                                                                                                                                                                                                                                                                                                                                                                                                                                                                                                                                                                                                                                                                                                                                                                                                                                                                                                                                                                                                                                                                                                                                                                                                                                                                                                                                                                                                                                                                                                                                                                                                                                                                                                                                                                                                                                                                                                                                                                     | 7                    | DSM_20438G00648, DSM_20438G00649, DSM_20438G00650, DSM_20438G00651, DSM_20438G00652, DSM_20438G00653, DSM_20438G00654                                                                                      | Yes                 | 1                     | 1                  | DSM_20438G00648-DSM_20438G00657 |
| <i>Lactobacillus kimchiensis</i>                 | DSM 14716    | 6                       | DSM_14716G00088, DSM_14716G00089, DSM_14716G00090, DSM_14716G00091, DSM_14716G00092, DSM_14716G00093                                                                                                                                                                                                                                                                                                                                                                                                                                                                                                                                                                                                                                                                                                                                                                                                                                                                                                                                                                                                                                                                                                                                                                                                                                                                                                                                                                                                                                                                                                                                                                                                                                                                                                                                                                                                                                                                                                                                                                                                                                                                                                                                                                                                                                                                                                                                                                                                                                                                                                                                                                                                                                                                                                                                                                                                                                                                                                                                                                                                                                                                                                                                                                                                                                                                                                                                                                                                                                                                                                                                                                                                                                                                                                                                                                                                                                                                                                                                                                                                                                                                                                                                                                                                                                                                                                                                                                                                                                                                                                                                                                                                                                                                                                                                                                                                                                                                                                                                                                                                                                                                                                                                                                                                                                                                                                                                                                                                                                  | 4                    | DSM_14716G00088, DSM_14716G00089, DSM_14716G00090, DSM_14716G00091                                                                                                                                         | Yes                 | 1                     | 1                  | DSM_14716G00088-DSM_14716G00093 |
| <i>Lactobacillus midlandis</i>                   | DSM 14500    | 9                       | DSM_14500G00041, DSM_14500G00042, DSM_14500G00043, DSM_14500G00044, DSM_14500G00045, DSM_14500G00046, DSM_14500G00047, DSM_14500G00048, DSM_14500G00049                                                                                                                                                                                                                                                                                                                                                                                                                                                                                                                                                                                                                                                                                                                                                                                                                                                                                                                                                                                                                                                                                                                                                                                                                                                                                                                                                                                                                                                                                                                                                                                                                                                                                                                                                                                                                                                                                                                                                                                                                                                                                                                                                                                                                                                                                                                                                                                                                                                                                                                                                                                                                                                                                                                                                                                                                                                                                                                                                                                                                                                                                                                                                                                                                                                                                                                                                                                                                                                                                                                                                                                                                                                                                                                                                                                                                                                                                                                                                                                                                                                                                                                                                                                                                                                                                                                                                                                                                                                                                                                                                                                                                                                                                                                                                                                                                                                                                                                                                                                                                                                                                                                                                                                                                                                                                                                                                                               | 10                   | DSM_14500G00041, DSM_14500G00042, DSM_14500G00043, DSM_14500G00044, DSM_14500G00045, DSM_14500G00046, DSM_14500G00047, DSM_14500G00048, DSM_14500G00049, DSM_14500G00050, DSM_14500G00051                  | No                  | 0                     | 0                  |                                 |
| <i>Lactobacillus nesteri</i>                     | DSM 16982    | 8                       | DSM_16982G00249, DSM_16982G00250, DSM_16982G00251, DSM_16982G00252, DSM_16982G00253, DSM_16982G00254, DSM_16982G00255, DSM_16982G00256, DSM_16982G00257                                                                                                                                                                                                                                                                                                                                                                                                                                                                                                                                                                                                                                                                                                                                                                                                                                                                                                                                                                                                                                                                                                                                                                                                                                                                                                                                                                                                                                                                                                                                                                                                                                                                                                                                                                                                                                                                                                                                                                                                                                                                                                                                                                                                                                                                                                                                                                                                                                                                                                                                                                                                                                                                                                                                                                                                                                                                                                                                                                                                                                                                                                                                                                                                                                                                                                                                                                                                                                                                                                                                                                                                                                                                                                                                                                                                                                                                                                                                                                                                                                                                                                                                                                                                                                                                                                                                                                                                                                                                                                                                                                                                                                                                                                                                                                                                                                                                                                                                                                                                                                                                                                                                                                                                                                                                                                                                                                               | 10                   | DSM_16982G00249, DSM_16982G00250, DSM_16982G00251, DSM_16982G00252, DSM_16982G00253, DSM_16982G00254, DSM_16982G00255, DSM_16982G00256, DSM_16982G00257, DSM_16982G00258, DSM_16982G00259, DSM_16982G00260 | No                  | 0                     | 0                  |                                 |
| <i>Lactobacillus crustorum</i>                   | LMG 23699    | 6                       | LMG_23699G00127, LMG_23699G00128, LMG_23699G00129, LMG_23699G00130, LMG_23699G00131, LMG_23699G00132                                                                                                                                                                                                                                                                                                                                                                                                                                                                                                                                                                                                                                                                                                                                                                                                                                                                                                                                                                                                                                                                                                                                                                                                                                                                                                                                                                                                                                                                                                                                                                                                                                                                                                                                                                                                                                                                                                                                                                                                                                                                                                                                                                                                                                                                                                                                                                                                                                                                                                                                                                                                                                                                                                                                                                                                                                                                                                                                                                                                                                                                                                                                                                                                                                                                                                                                                                                                                                                                                                                                                                                                                                                                                                                                                                                                                                                                                                                                                                                                                                                                                                                                                                                                                                                                                                                                                                                                                                                                                                                                                                                                                                                                                                                                                                                                                                                                                                                                                                                                                                                                                                                                                                                                                                                                                                                                                                                                                                  | 6                    | LMG_23699G00127, LMG_23699G00128, LMG_23699G00129, LMG_23699G00130, LMG_23699G00131, LMG_23699G00132                                                                                                       | No                  | 0                     | 0                  |                                 |
| <i>Lactobacillus furci</i>                       | JCM 11951    | 5                       | JCM_11951G00051, JCM_11951G00052, JCM_11951G00053, JCM_11951G00054, JCM_11951G00055                                                                                                                                                                                                                                                                                                                                                                                                                                                                                                                                                                                                                                                                                                                                                                                                                                                                                                                                                                                                                                                                                                                                                                                                                                                                                                                                                                                                                                                                                                                                                                                                                                                                                                                                                                                                                                                                                                                                                                                                                                                                                                                                                                                                                                                                                                                                                                                                                                                                                                                                                                                                                                                                                                                                                                                                                                                                                                                                                                                                                                                                                                                                                                                                                                                                                                                                                                                                                                                                                                                                                                                                                                                                                                                                                                                                                                                                                                                                                                                                                                                                                                                                                                                                                                                                                                                                                                                                                                                                                                                                                                                                                                                                                                                                                                                                                                                                                                                                                                                                                                                                                                                                                                                                                                                                                                                                                                                                                                                   | 5                    | JCM_11951G00051, JCM_11951G00052, JCM_11951G00053, JCM_11951G00054, JCM_11951G00055                                                                                                                        | No                  | 0                     | 0                  |                                 |
| <i>Lactobacillus farci</i>                       | JCM 17355    | 5                       | JCM_17355G00149, JCM_17355G00150, JCM_17355G00151, JCM_17355G00152, JCM_17355G00153                                                                                                                                                                                                                                                                                                                                                                                                                                                                                                                                                                                                                                                                                                                                                                                                                                                                                                                                                                                                                                                                                                                                                                                                                                                                                                                                                                                                                                                                                                                                                                                                                                                                                                                                                                                                                                                                                                                                                                                                                                                                                                                                                                                                                                                                                                                                                                                                                                                                                                                                                                                                                                                                                                                                                                                                                                                                                                                                                                                                                                                                                                                                                                                                                                                                                                                                                                                                                                                                                                                                                                                                                                                                                                                                                                                                                                                                                                                                                                                                                                                                                                                                                                                                                                                                                                                                                                                                                                                                                                                                                                                                                                                                                                                                                                                                                                                                                                                                                                                                                                                                                                                                                                                                                                                                                                                                                                                                                                                   | 5                    | JCM_17355G00149, JCM_17355G00150, JCM_17355G00151, JCM_17355G00152, JCM_17355G00153                                                                                                                        | No                  | 0                     | 0                  |                                 |
| <i>Lactobacillus fuscus</i>                      | DSM 18184    | 5                       | DSM_18184G00034, DSM_18184G00035, DSM_18184G00036, DSM_18184G00037, DSM_18184G00038                                                                                                                                                                                                                                                                                                                                                                                                                                                                                                                                                                                                                                                                                                                                                                                                                                                                                                                                                                                                                                                                                                                                                                                                                                                                                                                                                                                                                                                                                                                                                                                                                                                                                                                                                                                                                                                                                                                                                                                                                                                                                                                                                                                                                                                                                                                                                                                                                                                                                                                                                                                                                                                                                                                                                                                                                                                                                                                                                                                                                                                                                                                                                                                                                                                                                                                                                                                                                                                                                                                                                                                                                                                                                                                                                                                                                                                                                                                                                                                                                                                                                                                                                                                                                                                                                                                                                                                                                                                                                                                                                                                                                                                                                                                                                                                                                                                                                                                                                                                                                                                                                                                                                                                                                                                                                                                                                                                                                                                   | 5                    | DSM_18184G00034, DSM_18184G00035, DSM_18184G00036, DSM_18184G00037, DSM_18184G00038                                                                                                                        | No                  | 0                     | 0                  |                                 |
| <i>Lactobacillus alimenteris</i>                 | DSM 20249    | 5                       | DSM_20249G00191, DSM_20249G00192, DSM_20249G00193, DSM_20249G00194, DSM_20249G00195                                                                                                                                                                                                                                                                                                                                                                                                                                                                                                                                                                                                                                                                                                                                                                                                                                                                                                                                                                                                                                                                                                                                                                                                                                                                                                                                                                                                                                                                                                                                                                                                                                                                                                                                                                                                                                                                                                                                                                                                                                                                                                                                                                                                                                                                                                                                                                                                                                                                                                                                                                                                                                                                                                                                                                                                                                                                                                                                                                                                                                                                                                                                                                                                                                                                                                                                                                                                                                                                                                                                                                                                                                                                                                                                                                                                                                                                                                                                                                                                                                                                                                                                                                                                                                                                                                                                                                                                                                                                                                                                                                                                                                                                                                                                                                                                                                                                                                                                                                                                                                                                                                                                                                                                                                                                                                                                                                                                                                                   | 5                    | DSM_20249G00191, DSM_20249G00192, DSM_20249G00193, DSM_20249G00194, DSM_20249G00195                                                                                                                        | No                  | 0                     | 0                  |                                 |
| <i>Lactobacillus paralimentarius</i>             | DSM 19674    | 6                       | DSM_19674G00249, DSM_19674G00250, DSM_19674G00251, DSM_19674G00252, DSM_19674G00253, DSM_19674G00254                                                                                                                                                                                                                                                                                                                                                                                                                                                                                                                                                                                                                                                                                                                                                                                                                                                                                                                                                                                                                                                                                                                                                                                                                                                                                                                                                                                                                                                                                                                                                                                                                                                                                                                                                                                                                                                                                                                                                                                                                                                                                                                                                                                                                                                                                                                                                                                                                                                                                                                                                                                                                                                                                                                                                                                                                                                                                                                                                                                                                                                                                                                                                                                                                                                                                                                                                                                                                                                                                                                                                                                                                                                                                                                                                                                                                                                                                                                                                                                                                                                                                                                                                                                                                                                                                                                                                                                                                                                                                                                                                                                                                                                                                                                                                                                                                                                                                                                                                                                                                                                                                                                                                                                                                                                                                                                                                                                                                                  | 6                    | DSM_19674G00249, DSM_19674G00250, DSM_19674G00251, DSM_19674G00252, DSM_19674G00253, DSM_19674G00254                                                                                                       | No                  | 0                     | 0                  |                                 |
| <i>Lactobacillus paralimentarius</i>             | DSM 13961    | 6                       | DSM_13961G00084, DSM_13961G00085, DSM_13961G00086, DSM_13961G00087, DSM_13961G00088, DSM_13961G00089                                                                                                                                                                                                                                                                                                                                                                                                                                                                                                                                                                                                                                                                                                                                                                                                                                                                                                                                                                                                                                                                                                                                                                                                                                                                                                                                                                                                                                                                                                                                                                                                                                                                                                                                                                                                                                                                                                                                                                                                                                                                                                                                                                                                                                                                                                                                                                                                                                                                                                                                                                                                                                                                                                                                                                                                                                                                                                                                                                                                                                                                                                                                                                                                                                                                                                                                                                                                                                                                                                                                                                                                                                                                                                                                                                                                                                                                                                                                                                                                                                                                                                                                                                                                                                                                                                                                                                                                                                                                                                                                                                                                                                                                                                                                                                                                                                                                                                                                                                                                                                                                                                                                                                                                                                                                                                                                                                                                                                  | 6                    | DSM_13961G00084, DSM_13961G00085, DSM_13961G00086, DSM_13961G00087, DSM_13961G00088, DSM_13961G00089                                                                                                       | No                  | 0                     | 0                  |                                 |
| <i>Lactobacillus paralimentarius</i>             | DSM 13288    | 5                       | DSM_13288G00127, DSM_13288G00128, DSM_13288G00129, DSM_13288G00130, DSM_13288G00131                                                                                                                                                                                                                                                                                                                                                                                                                                                                                                                                                                                                                                                                                                                                                                                                                                                                                                                                                                                                                                                                                                                                                                                                                                                                                                                                                                                                                                                                                                                                                                                                                                                                                                                                                                                                                                                                                                                                                                                                                                                                                                                                                                                                                                                                                                                                                                                                                                                                                                                                                                                                                                                                                                                                                                                                                                                                                                                                                                                                                                                                                                                                                                                                                                                                                                                                                                                                                                                                                                                                                                                                                                                                                                                                                                                                                                                                                                                                                                                                                                                                                                                                                                                                                                                                                                                                                                                                                                                                                                                                                                                                                                                                                                                                                                                                                                                                                                                                                                                                                                                                                                                                                                                                                                                                                                                                                                                                                                                   | 5                    | DSM_13288G00127, DSM_13288G00128, DSM_13288G00129, DSM_13288G00130, DSM_13288G00131                                                                                                                        | No                  | 0                     | 0                  |                                 |
| <i>Lactobacillus necetti</i>                     | DSM 20183    | 6                       | DSM_20183G00143, DSM_20183G00144, DSM_20183G00145, DSM_20183G00146, DSM_20183G00147, DSM_20183G00148                                                                                                                                                                                                                                                                                                                                                                                                                                                                                                                                                                                                                                                                                                                                                                                                                                                                                                                                                                                                                                                                                                                                                                                                                                                                                                                                                                                                                                                                                                                                                                                                                                                                                                                                                                                                                                                                                                                                                                                                                                                                                                                                                                                                                                                                                                                                                                                                                                                                                                                                                                                                                                                                                                                                                                                                                                                                                                                                                                                                                                                                                                                                                                                                                                                                                                                                                                                                                                                                                                                                                                                                                                                                                                                                                                                                                                                                                                                                                                                                                                                                                                                                                                                                                                                                                                                                                                                                                                                                                                                                                                                                                                                                                                                                                                                                                                                                                                                                                                                                                                                                                                                                                                                                                                                                                                                                                                                                                                  | 6                    | DSM_20183G00143, DSM_20183G00144, DSM_20183G00145, DSM_20183G00146, DSM_20183G00147, DSM_20183G00148                                                                                                       | No                  | 0                     | 0                  |                                 |
| <i>Lactobacillus nodensis</i>                    | DSM 19682    | 7                       | DSM_19682G001072, DSM_19682G001073, DSM_19682G001074, DSM_19682G001075, DSM_19682G001076, DSM_19682G001077, DSM_19682G001078                                                                                                                                                                                                                                                                                                                                                                                                                                                                                                                                                                                                                                                                                                                                                                                                                                                                                                                                                                                                                                                                                                                                                                                                                                                                                                                                                                                                                                                                                                                                                                                                                                                                                                                                                                                                                                                                                                                                                                                                                                                                                                                                                                                                                                                                                                                                                                                                                                                                                                                                                                                                                                                                                                                                                                                                                                                                                                                                                                                                                                                                                                                                                                                                                                                                                                                                                                                                                                                                                                                                                                                                                                                                                                                                                                                                                                                                                                                                                                                                                                                                                                                                                                                                                                                                                                                                                                                                                                                                                                                                                                                                                                                                                                                                                                                                                                                                                                                                                                                                                                                                                                                                                                                                                                                                                                                                                                                                          | 7                    | DSM_19682G001072, DSM_19682G001073, DSM_19682G001074, DSM_19682G001075, DSM_19682G001076, DSM_19682G001077, DSM_19682G001078                                                                               | No                  | 0                     | 0                  |                                 |
| <i>Lactobacillus vromvoldensis</i>               | DSM 14857    | 6                       | DSM_14857G001286, DSM_14857G001287, DSM_14857G001288, DSM_14857G001289, DSM_14857G001290, DSM_14857G001291                                                                                                                                                                                                                                                                                                                                                                                                                                                                                                                                                                                                                                                                                                                                                                                                                                                                                                                                                                                                                                                                                                                                                                                                                                                                                                                                                                                                                                                                                                                                                                                                                                                                                                                                                                                                                                                                                                                                                                                                                                                                                                                                                                                                                                                                                                                                                                                                                                                                                                                                                                                                                                                                                                                                                                                                                                                                                                                                                                                                                                                                                                                                                                                                                                                                                                                                                                                                                                                                                                                                                                                                                                                                                                                                                                                                                                                                                                                                                                                                                                                                                                                                                                                                                                                                                                                                                                                                                                                                                                                                                                                                                                                                                                                                                                                                                                                                                                                                                                                                                                                                                                                                                                                                                                                                                                                                                                                                                            | 6                    | DSM_14857G001286, DSM_14857G001287, DSM_14857G001288, DSM_14857G001289, DSM_14857G001290, DSM_14857G001291                                                                                                 | No                  | 0                     | 0                  |                                 |
| <i>Lactobacillus florida</i>                     | DSM 23037    | 0                       |                                                                                                                                                                                                                                                                                                                                                                                                                                                                                                                                                                                                                                                                                                                                                                                                                                                                                                                                                                                                                                                                                                                                                                                                                                                                                                                                                                                                                                                                                                                                                                                                                                                                                                                                                                                                                                                                                                                                                                                                                                                                                                                                                                                                                                                                                                                                                                                                                                                                                                                                                                                                                                                                                                                                                                                                                                                                                                                                                                                                                                                                                                                                                                                                                                                                                                                                                                                                                                                                                                                                                                                                                                                                                                                                                                                                                                                                                                                                                                                                                                                                                                                                                                                                                                                                                                                                                                                                                                                                                                                                                                                                                                                                                                                                                                                                                                                                                                                                                                                                                                                                                                                                                                                                                                                                                                                                                                                                                                                                                                                                       | 0                    |                                                                                                                                                                                                            | No                  | 0                     | 0                  |                                 |
| <i>Lactobacillus acidophilus</i>                 | DSM 20079    | 11                      | DSM_20079G00040, DSM_20079G001512, DSM_20079G001513, DSM_20079G001514, DSM_20079G001515, DSM_20079G001516, DSM_20079G001517, DSM_20079G001518, DSM_20079G001519, DSM_20079G001520, DSM_20079G001521                                                                                                                                                                                                                                                                                                                                                                                                                                                                                                                                                                                                                                                                                                                                                                                                                                                                                                                                                                                                                                                                                                                                                                                                                                                                                                                                                                                                                                                                                                                                                                                                                                                                                                                                                                                                                                                                                                                                                                                                                                                                                                                                                                                                                                                                                                                                                                                                                                                                                                                                                                                                                                                                                                                                                                                                                                                                                                                                                                                                                                                                                                                                                                                                                                                                                                                                                                                                                                                                                                                                                                                                                                                                                                                                                                                                                                                                                                                                                                                                                                                                                                                                                                                                                                                                                                                                                                                                                                                                                                                                                                                                                                                                                                                                                                                                                                                                                                                                                                                                                                                                                                                                                                                                                                                                                                                                   | 11                   | DSM_20079G00040, DSM_20079G001512, DSM_20079G001513, DSM_20079G001514, DSM_20079G001515, DSM_20079G001516, DSM_20079G001517, DSM_20079G001518, DSM_20079G001519, DSM_20079G001520, DSM_20079G001521        | No                  | 0                     | 0                  |                                 |
| <i>Lactobacillus amylovorus</i>                  | DSM 20533    | 10                      | DSM_20533G00007, DSM_20533G001919, DSM_20533G001920, DSM_20533G001921, DSM_20533G001922, DSM_20533G001923, DSM_20533G001924, DSM_20533G001925, DSM_20533G001926, DSM_20533G001927                                                                                                                                                                                                                                                                                                                                                                                                                                                                                                                                                                                                                                                                                                                                                                                                                                                                                                                                                                                                                                                                                                                                                                                                                                                                                                                                                                                                                                                                                                                                                                                                                                                                                                                                                                                                                                                                                                                                                                                                                                                                                                                                                                                                                                                                                                                                                                                                                                                                                                                                                                                                                                                                                                                                                                                                                                                                                                                                                                                                                                                                                                                                                                                                                                                                                                                                                                                                                                                                                                                                                                                                                                                                                                                                                                                                                                                                                                                                                                                                                                                                                                                                                                                                                                                                                                                                                                                                                                                                                                                                                                                                                                                                                                                                                                                                                                                                                                                                                                                                                                                                                                                                                                                                                                                                                                                                                     | 10                   | DSM_20533G00007, DSM_20533G001919, DSM_20533G001920, DSM_20533G001921, DSM_20533G001922, DSM_20533G001923, DSM_20533G001924, DSM_20533G001925, DSM_20533G001926, DSM_20533G001927                          | No                  | 0                     | 0                  |                                 |
| <i>Lactobacillus amylovorus</i>                  | DSM 16698    | 6                       | DSM_16698G001813, DSM_16698G001814, DSM_16698G001815, DSM_16698G001816, DSM_16698G001817, DSM_16698G001818                                                                                                                                                                                                                                                                                                                                                                                                                                                                                                                                                                                                                                                                                                                                                                                                                                                                                                                                                                                                                                                                                                                                                                                                                                                                                                                                                                                                                                                                                                                                                                                                                                                                                                                                                                                                                                                                                                                                                                                                                                                                                                                                                                                                                                                                                                                                                                                                                                                                                                                                                                                                                                                                                                                                                                                                                                                                                                                                                                                                                                                                                                                                                                                                                                                                                                                                                                                                                                                                                                                                                                                                                                                                                                                                                                                                                                                                                                                                                                                                                                                                                                                                                                                                                                                                                                                                                                                                                                                                                                                                                                                                                                                                                                                                                                                                                                                                                                                                                                                                                                                                                                                                                                                                                                                                                                                                                                                                                            | 6                    | DSM_16698G001813, DSM_16698G001814, DSM_16698G001815, DSM_16698G001816, DSM_16698G001817, DSM_16698G001818                                                                                                 | No                  | 0                     | 0                  |                                 |
| <i>Lactobacillus krasovskii</i>                  | DSM 16761    | 6                       | DSM_16761G001138, DSM_16761G001139, DSM_16761G001140, DSM_16761G001141, DSM_16761G001142, DSM_16761G001143                                                                                                                                                                                                                                                                                                                                                                                                                                                                                                                                                                                                                                                                                                                                                                                                                                                                                                                                                                                                                                                                                                                                                                                                                                                                                                                                                                                                                                                                                                                                                                                                                                                                                                                                                                                                                                                                                                                                                                                                                                                                                                                                                                                                                                                                                                                                                                                                                                                                                                                                                                                                                                                                                                                                                                                                                                                                                                                                                                                                                                                                                                                                                                                                                                                                                                                                                                                                                                                                                                                                                                                                                                                                                                                                                                                                                                                                                                                                                                                                                                                                                                                                                                                                                                                                                                                                                                                                                                                                                                                                                                                                                                                                                                                                                                                                                                                                                                                                                                                                                                                                                                                                                                                                                                                                                                                                                                                                                            | 6                    | DSM_16761G001138, DSM_16761G001139, DSM_16761G001140, DSM_16761G001141, DSM_16761G001142, DSM_16761G001143                                                                                                 | No                  | 0                     | 0                  |                                 |
| <i>Lactobacillus kefirifaciens kefirifaciens</i> | DSM 5016     | 8                       | DSM_5016G001591, DSM_5016G001592, DSM_5016G001593, DSM_5016G001594, DSM_5016G001595, DSM_5016G001596, DSM_5016G001597, DSM_5016G001598                                                                                                                                                                                                                                                                                                                                                                                                                                                                                                                                                                                                                                                                                                                                                                                                                                                                                                                                                                                                                                                                                                                                                                                                                                                                                                                                                                                                                                                                                                                                                                                                                                                                                                                                                                                                                                                                                                                                                                                                                                                                                                                                                                                                                                                                                                                                                                                                                                                                                                                                                                                                                                                                                                                                                                                                                                                                                                                                                                                                                                                                                                                                                                                                                                                                                                                                                                                                                                                                                                                                                                                                                                                                                                                                                                                                                                                                                                                                                                                                                                                                                                                                                                                                                                                                                                                                                                                                                                                                                                                                                                                                                                                                                                                                                                                                                                                                                                                                                                                                                                                                                                                                                                                                                                                                                                                                                                                                | 8                    | DSM_5016G001591, DSM_5016G001592, DSM_5016G001593, DSM_5016G001594, DSM_5016G001595, DSM_5016G001596, DSM_5016G001597, DSM_5016G001598                                                                     | No                  | 0                     | 0                  |                                 |
| <i>Lactobacillus kefirifaciens kefirifaciens</i> | DSM 10550    | 4                       | DSM_10550G001020, DSM_10550G002011, DSM_10550G002012, DSM_10550G002013                                                                                                                                                                                                                                                                                                                                                                                                                                                                                                                                                                                                                                                                                                                                                                                                                                                                                                                                                                                                                                                                                                                                                                                                                                                                                                                                                                                                                                                                                                                                                                                                                                                                                                                                                                                                                                                                                                                                                                                                                                                                                                                                                                                                                                                                                                                                                                                                                                                                                                                                                                                                                                                                                                                                                                                                                                                                                                                                                                                                                                                                                                                                                                                                                                                                                                                                                                                                                                                                                                                                                                                                                                                                                                                                                                                                                                                                                                                                                                                                                                                                                                                                                                                                                                                                                                                                                                                                                                                                                                                                                                                                                                                                                                                                                                                                                                                                                                                                                                                                                                                                                                                                                                                                                                                                                                                                                                                                                                                                | 4                    | DSM_10550G001020, DSM_10550G002011, DSM_10550G002012, DSM_10550G002013                                                                                                                                     | No                  | 0                     | 0                  |                                 |
| <i>Lactobacillus alimenteris</i>                 | DSM 16047    | 3                       | DSM_16047G001070, DSM_16047G001071, DSM_16047G001072                                                                                                                                                                                                                                                                                                                                                                                                                                                                                                                                                                                                                                                                                                                                                                                                                                                                                                                                                                                                                                                                                                                                                                                                                                                                                                                                                                                                                                                                                                                                                                                                                                                                                                                                                                                                                                                                                                                                                                                                                                                                                                                                                                                                                                                                                                                                                                                                                                                                                                                                                                                                                                                                                                                                                                                                                                                                                                                                                                                                                                                                                                                                                                                                                                                                                                                                                                                                                                                                                                                                                                                                                                                                                                                                                                                                                                                                                                                                                                                                                                                                                                                                                                                                                                                                                                                                                                                                                                                                                                                                                                                                                                                                                                                                                                                                                                                                                                                                                                                                                                                                                                                                                                                                                                                                                                                                                                                                                                                                                  | 3                    | DSM_16047G001070, DSM_16047G001071, DSM_16047G001072                                                                                                                                                       | No                  | 0                     | 0                  |                                 |
| <i>Lactobacillus helveticus</i>                  | LMG 22660    | 9                       | LMG_22660G001772, LMG_22660G001951, LMG_22660G001952, LMG_22660G001953, LMG_22660G001954, LMG_22660G001955, LMG_22660G001956, LMG_22660G001957, LMG_22660G001958                                                                                                                                                                                                                                                                                                                                                                                                                                                                                                                                                                                                                                                                                                                                                                                                                                                                                                                                                                                                                                                                                                                                                                                                                                                                                                                                                                                                                                                                                                                                                                                                                                                                                                                                                                                                                                                                                                                                                                                                                                                                                                                                                                                                                                                                                                                                                                                                                                                                                                                                                                                                                                                                                                                                                                                                                                                                                                                                                                                                                                                                                                                                                                                                                                                                                                                                                                                                                                                                                                                                                                                                                                                                                                                                                                                                                                                                                                                                                                                                                                                                                                                                                                                                                                                                                                                                                                                                                                                                                                                                                                                                                                                                                                                                                                                                                                                                                                                                                                                                                                                                                                                                                                                                                                                                                                                                                                      | 9                    | LMG_22660G001772, LMG_22660G001951, LMG_22660G001952, LMG_22660G001953, LMG_22660G001954, LMG_22660G001955, LMG_22660G001956, LMG_22660G001957, LMG_22660G001958                                           | No                  | 0                     | 0                  |                                 |
| <i>Lactobacillus helveticus</i>                  | CGMCC 1.1877 | 5                       | CGMCC_1.1877G000568, CGMCC_1.1877G000569, CGMCC_1.1877G000570, CGMCC_1.1877G000571, CGMCC_1.1877G000572                                                                                                                                                                                                                                                                                                                                                                                                                                                                                                                                                                                                                                                                                                                                                                                                                                                                                                                                                                                                                                                                                                                                                                                                                                                                                                                                                                                                                                                                                                                                                                                                                                                                                                                                                                                                                                                                                                                                                                                                                                                                                                                                                                                                                                                                                                                                                                                                                                                                                                                                                                                                                                                                                                                                                                                                                                                                                                                                                                                                                                                                                                                                                                                                                                                                                                                                                                                                                                                                                                                                                                                                                                                                                                                                                                                                                                                                                                                                                                                                                                                                                                                                                                                                                                                                                                                                                                                                                                                                                                                                                                                                                                                                                                                                                                                                                                                                                                                                                                                                                                                                                                                                                                                                                                                                                                                                                                                                                               | 5                    | CGMCC_1.1877G000568, CGMCC_1.1877G000569, CGMCC_1.1877G000570, CGMCC_1.1877G000571, CGMCC_1.1877G000572                                                                                                    | No                  | 0                     | 0                  |                                 |
| <i>Lactobacillus gallinarum</i>                  | DSM 10532    | 11                      | DSM_10532G001020, DSM_10532G000978, DSM_10532G000979, DSM_10532G000980, DSM_10532G000981, DSM_10532G000982, DSM_10532G000983, DSM_10532G000984, DSM_10532G000985, DSM_10532G000986, DSM_10532G000987                                                                                                                                                                                                                                                                                                                                                                                                                                                                                                                                                                                                                                                                                                                                                                                                                                                                                                                                                                                                                                                                                                                                                                                                                                                                                                                                                                                                                                                                                                                                                                                                                                                                                                                                                                                                                                                                                                                                                                                                                                                                                                                                                                                                                                                                                                                                                                                                                                                                                                                                                                                                                                                                                                                                                                                                                                                                                                                                                                                                                                                                                                                                                                                                                                                                                                                                                                                                                                                                                                                                                                                                                                                                                                                                                                                                                                                                                                                                                                                                                                                                                                                                                                                                                                                                                                                                                                                                                                                                                                                                                                                                                                                                                                                                                                                                                                                                                                                                                                                                                                                                                                                                                                                                                                                                                                                                  | 11                   | DSM_10532G001020, DSM_10532G000978, DSM_10532G000979, DSM_10532G000980, DSM_10532G000981, DSM_10532G000982, DSM_10532G000983, DSM_10532G000984, DSM_10532G000985, DSM_10532G000986, DSM_10532G000987       | No                  | 0                     | 0                  |                                 |
| <i>Lactobacillus crispatus</i>                   | DSM 10533    | 11                      | DSM_10533G000228, DSM_10533G000229, DSM_10533G000230, DSM_10533G000231, DSM_10533G000232, DSM_10533G000233, DSM_10533G000234, DSM_10533G000235, DSM_10533G000236, DSM_10533G000237, DSM_10533G000238                                                                                                                                                                                                                                                                                                                                                                                                                                                                                                                                                                                                                                                                                                                                                                                                                                                                                                                                                                                                                                                                                                                                                                                                                                                                                                                                                                                                                                                                                                                                                                                                                                                                                                                                                                                                                                                                                                                                                                                                                                                                                                                                                                                                                                                                                                                                                                                                                                                                                                                                                                                                                                                                                                                                                                                                                                                                                                                                                                                                                                                                                                                                                                                                                                                                                                                                                                                                                                                                                                                                                                                                                                                                                                                                                                                                                                                                                                                                                                                                                                                                                                                                                                                                                                                                                                                                                                                                                                                                                                                                                                                                                                                                                                                                                                                                                                                                                                                                                                                                                                                                                                                                                                                                                                                                                                                                  | 11                   | DSM_10533G000228, DSM_10533G000229, DSM_10533G000230, DSM_10533G000231, DSM_10533G000232, DSM_10533G000233, DSM_10533G000234, DSM_10533G000235, DSM_10533G000236, DSM_10533G000237, DSM_10533G000238       | No                  | 0                     | 0                  |                                 |
| <i>Lactobacillus acetotolerans</i>               | DSM 20749    | 0                       |                                                                                                                                                                                                                                                                                                                                                                                                                                                                                                                                                                                                                                                                                                                                                                                                                                                                                                                                                                                                                                                                                                                                                                                                                                                                                                                                                                                                                                                                                                                                                                                                                                                                                                                                                                                                                                                                                                                                                                                                                                                                                                                                                                                                                                                                                                                                                                                                                                                                                                                                                                                                                                                                                                                                                                                                                                                                                                                                                                                                                                                                                                                                                                                                                                                                                                                                                                                                                                                                                                                                                                                                                                                                                                                                                                                                                                                                                                                                                                                                                                                                                                                                                                                                                                                                                                                                                                                                                                                                                                                                                                                                                                                                                                                                                                                                                                                                                                                                                                                                                                                                                                                                                                                                                                                                                                                                                                                                                                                                                                                                       | 0                    |                                                                                                                                                                                                            | No                  | 0                     | 0                  |                                 |
| <i>Lactobacillus intestinalis</i>                | DSM 6629     | 13                      | DSM_6629G000082, DSM_6629G001159, DSM_6629G001160, DSM_6629G001161, DSM_6629G001162, DSM_6629G001163, DSM_6629G001164, DSM_6629G001165, DSM_6629G001166, DSM_6629G001167, DSM_6629G001168, DSM_6629G001169, DSM_6629G001170, DSM_6629G001171, DSM_6629G001172, DSM_6629G001173, DSM_6629G001174, DSM_6629G001175, DSM_6629G001176, DSM_6629G001177, DSM_6629G001178, DSM_6629G001179, DSM_6629G001180, DSM_6629G001181, DSM_6629G001182, DSM_6629G001183, DSM_6629G001184, DSM_6629G001185, DSM_6629G001186, DSM_6629G001187, DSM_6629G001188, DSM_6629G001189, DSM_6629G001190, DSM_6629G001191, DSM_6629G001192, DSM_6629G001193, DSM_6629G001194, DSM_6629G001195, DSM_6629G001196, DSM_6629G001197, DSM_6629G001198, DSM_6629G001199, DSM_6629G001200, DSM_6629G001201, DSM_6629G001202, DSM_6629G001203, DSM_6629G001204, DSM_6629G001205, DSM_6629G001206, DSM_6629G001207, DSM_6629G001208, DSM_6629G001209, DSM_6629G001210, DSM_6629G001211, DSM_6629G001212, DSM_6629G001213, DSM_6629G001214, DSM_6629G001215, DSM_6629G001216, DSM_6629G001217, DSM_6629G001218, DSM_6629G001219, DSM_6629G001220, DSM_6629G001221, DSM_6629G001222, DSM_6629G001223, DSM_6629G001224, DSM_6629G001225, DSM_6629G001226, DSM_6629G001227, DSM_6629G001228, DSM_6629G001229, DSM_6629G001230, DSM_6629G001231, DSM_6629G001232, DSM_6629G001233, DSM_6629G001234, DSM_6629G001235, DSM_6629G001236, DSM_6629G001237, DSM_6629G001238, DSM_6629G001239, DSM_6629G001240, DSM_6629G001241, DSM_6629G001242, DSM_6629G001243, DSM_6629G001244, DSM_6629G001245, DSM_6629G001246, DSM_6629G001247, DSM_6629G001248, DSM_6629G001249, DSM_6629G001250, DSM_6629G001251, DSM_6629G001252, DSM_6629G001253, DSM_6629G001254, DSM_6629G001255, DSM_6629G001256, DSM_6629G001257, DSM_6629G001258, DSM_6629G001259, DSM_6629G001260, DSM_6629G001261, DSM_6629G001262, DSM_6629G001263, DSM_6629G001264, DSM_6629G001265, DSM_6629G001266, DSM_6629G001267, DSM_6629G001268, DSM_6629G001269, DSM_6629G001270, DSM_6629G001271, DSM_6629G001272, DSM_6629G001273, DSM_6629G001274, DSM_6629G001275, DSM_6629G001276, DSM_6629G001277, DSM_6629G001278, DSM_6629G001279, DSM_6629G001280, DSM_6629G001281, DSM_6629G001282, DSM_6629G001283, DSM_6629G001284, DSM_6629G001285, DSM_6629G001286, DSM_6629G001287, DSM_6629G001288, DSM_6629G001289, DSM_6629G001290, DSM_6629G001291, DSM_6629G001292, DSM_6629G001293, DSM_6629G001294, DSM_6629G001295, DSM_6629G001296, DSM_6629G001297, DSM_6629G001298, DSM_6629G001299, DSM_6629G001300, DSM_6629G001301, DSM_6629G001302, DSM_6629G001303, DSM_6629G001304, DSM_6629G001305, DSM_6629G001306, DSM_6629G001307, DSM_6629G001308, DSM_6629G001309, DSM_6629G001310, DSM_6629G001311, DSM_6629G001312, DSM_6629G001313, DSM_6629G001314, DSM_6629G001315, DSM_6629G001316, DSM_6629G001317, DSM_6629G001318, DSM_6629G001319, DSM_6629G001320, DSM_6629G001321, DSM_6629G001322, DSM_6629G001323, DSM_6629G001324, DSM_6629G001325, DSM_6629G001326, DSM_6629G001327, DSM_6629G001328, DSM_6629G001329, DSM_6629G001330, DSM_6629G001331, DSM_6629G001332, DSM_6629G001333, DSM_6629G001334, DSM_6629G001335, DSM_6629G001336, DSM_6629G001337, DSM_6629G001338, DSM_6629G001339, DSM_6629G001340, DSM_6629G001341, DSM_6629G001342, DSM_6629G001343, DSM_6629G001344, DSM_6629G001345, DSM_6629G001346, DSM_6629G001347, DSM_6629G001348, DSM_6629G001349, DSM_6629G001350, DSM_6629G001351, DSM_6629G001352, DSM_6629G001353, DSM_6629G001354, DSM_6629G001355, DSM_6629G001356, DSM_6629G001357, DSM_6629G001358, DSM_6629G001359, DSM_6629G001360, DSM_6629G001361, DSM_6629G001362, DSM_6629G001363, DSM_6629G001364, DSM_6629G001365, DSM_6629G001366, DSM_6629G001367, DSM_6629G001368, DSM_6629G001369, DSM_6629G001370, DSM_6629G001371, DSM_6629G001372, DSM_6629G001373, DSM_6629G001374, DSM_6629G001375, DSM_6629G001376, DSM_6629G001377, DSM_6629G001378, DSM_6629G001379, DSM_6629G001380, DSM_6629G001381, DSM_6629G001382, DSM_6629G001383, DSM_6629G001384, DSM_6629G001385, DSM_6629G001386, DSM_6629G001387, DSM_6629G001388, DSM_6629G001389, DSM_6629G001390, DSM_6629G001391, DSM_6629G001392, DSM_6629G001393, DSM_6629G001394, DSM_6629G001395, DSM_6629G001396, DSM_6629G001397, DSM_6629G001398, DSM_6629G001399, DSM_6629G001400, DSM_6629G001401, DSM_6629G001402, DSM_6629G001403, DSM_6629G001404, DSM_6629G001405, DSM_6629G001406, DSM_6629G001407, DSM_6629G001408, DSM_6629G001409, DSM_6629G001410, DSM_6629G001411, DSM_6629G001412, DSM_6629G001413, DSM_6629G001414, DSM_6629G001415, DSM_6629G001416, DSM_6629G001417, DSM_6629G001418, DSM_6629G001419, DSM_6629G001420, DSM_6629G001421, DSM_6629G001422, DSM_6629G001423, DSM_6629G001424, DSM_6629G001425, DSM_6629G001426, DSM_6629G001427, DSM_6629G001428, DSM_6629G001429, DSM_6629G001430, DSM_6629G001431, DSM_6629G001432, DSM_6629G001433, DSM_6629G001434, DSM_6629G001435, DSM_6629G001436, DSM_6629G001437, DSM_6629G001438, DSM_6629G001439, DSM_6629G001440, DSM_6629G001441, DSM_6629G001442, DSM_6629G001443, DSM_6629G001444, DSM_6629G001445, DSM_6629G001446, DSM_6629G001447, DSM_6629G001448, DSM_6629G001449, DSM_6629G001450, DSM_6629G001451, DSM_6629G001452, DSM_6629G001453, DSM_6629G001454, DSM_6629G001455, DSM_6629G001456, DSM_6629G001457, DSM_6629G001458, DSM_6629G001459, DSM_6629G001460, DSM_6629G001461, DSM_6629G001462, DSM_6629G001463, DSM_6629G001464, DSM_6629G001465, DSM_6629G001466, DSM_6629G001467, DSM_6629G001468, DSM_6629G001469, DSM_6629G0014 |                      |                                                                                                                                                                                                            |                     |                       |                    |                                 |

|                               |            |             |                                                           |            |                                                         |     |           |           |                                                         |
|-------------------------------|------------|-------------|-----------------------------------------------------------|------------|---------------------------------------------------------|-----|-----------|-----------|---------------------------------------------------------|
| Lactobacillus koreensis       | JCM_16448  | 9           | JCM_16448GL000085, JCM_16448GL001438, JCM_16448GL001439   | 3          | JCM_16448GL001675, JCM_16448GL000224, JCM_16448GL000225 | Yes | 1         | 1         | JCM_16448GL000222, JCM_16448GL000225                    |
| Lactobacillus arzyme          | DSM_19395  | 16          | DSM_19395GL002319, DSM_19395GL000381, DSM_19395GL000382   | 1          | DSM_19395GL000034                                       | No  | 0         | 0         |                                                         |
| Lactobacillus acidifarinae    | DSM_19394  | 14          | DSM_19394GL001854, DSM_19394GL002248, DSM_19394GL002249   | 2          | DSM_19394GL001800, DSM_19394GL000905                    | Yes | 0         | 0         |                                                         |
| Lactobacillus nummirensis     | DSM_19117  | 15          | DSM_19117GL000223, DSM_19117GL002162, DSM_19117GL002163   | 1          | DSM_19117GL001722                                       | No  | 0         | 0         |                                                         |
| Lactobacillus spicheri        | DSM_15429  | 15          | DSM_15429GL000273, DSM_15429GL001364, DSM_15429GL001365   | 1          | DSM_15429GL000043                                       | No  | 0         | 0         |                                                         |
| Lactobacillus kimcheicus      | JCM_15350  | 7           | JCM_15350GL002468, JCM_15350GL000731, JCM_15350GL000732   | 1          | JCM_15350GL000783                                       | No  | 0         | 0         |                                                         |
| Lactobacillus similis         | DSM_23365  | 21          | DSM_23365GL001270, DSM_23365GL000121, DSM_23365GL000122   | 1          | DSM_23365GL001158                                       | Yes | 0         | 0         |                                                         |
| Lactobacillus odoraizoides    | DSM_19909  | 23          | DSM_19909GL000375, DSM_19909GL000334, DSM_19909GL000335   | 1          | DSM_19909GL002358                                       | Yes | 0         | 0         |                                                         |
| Lactobacillus collinsoniae    | DSM_20515  | 10          | DSM_20515GL000349, DSM_20515GL002667, DSM_20515GL002668   | 1          | DSM_20515GL000897                                       | Yes | 0         | 0         |                                                         |
| Lactobacillus paracollinoides | DSM_15502  | 15          | DSM_15502GL003136, DSM_15502GL000710, DSM_15502GL000711   | 1          | DSM_15502GL001533                                       | Yes | 0         | 0         |                                                         |
| Lactobacillus maderfermentans | DSM_5705   | 12          | DSM_5705GL001772, DSM_5705GL000489, DSM_5705GL000490      | 1          | DSM_5705GL000241                                        | No  | 0         | 0         |                                                         |
| Lactobacillus parabuchneri    | DSM_5707   | 9           | DSM_5707GL002343, DSM_5707GL002311, DSM_5707GL002312      | 1          | DSM_5707GL002384                                        | No  | 0         | 0         |                                                         |
| Lactobacillus parabuchneri    | DSM_15352  | 11          | DSM_15352GL001529, DSM_15352GL000299, DSM_15352GL000300   | 3          | DSM_15352GL002182, DSM_15352GL001528, DSM_15352GL001529 | Yes | 1         | 1         | DSM_15352GL001527, DSM_15352GL001531                    |
| Lactobacillus buchneri        | DSM_20057  | 5           | DSM_20057GL002290, DSM_20057GL002208, DSM_20057GL002209   | 1          | DSM_20057GL002253                                       | No  | 0         | 0         |                                                         |
| Lactobacillus cackinasensis   | DSM_19908  | 6           | DSM_19908GL000970, DSM_19908GL000708, DSM_19908GL000709   | 1          | DSM_19908GL002000                                       | Yes | 0         | 0         |                                                         |
| Lactobacillus kefirii         | DSM_20587  | 3           | DSM_20587GL001017, DSM_20587GL001780, DSM_20587GL001781   | 1          | DSM_20587GL001982                                       | No  | 0         | 0         |                                                         |
| Lactobacillus parakefirii     | DSM_10551  | 6           | DSM_10551GL001097, DSM_10551GL001348, DSM_10551GL001349   | 2          | DSM_10551GL000796, DSM_10551GL004542                    | No  | 0         | 0         |                                                         |
| Lactobacillus sunkii          | DSM_19904  | 4           | DSM_19904GL000561, DSM_19904GL001317, DSM_19904GL001318   | 1          | DSM_19904GL000903                                       | No  | 0         | 0         |                                                         |
| Lactobacillus rapti           | DSM_19907  | 6           | DSM_19907GL001146, DSM_19907GL002649, DSM_19907GL002650   | 1          | DSM_19907GL001524                                       | No  | 0         | 0         |                                                         |
| Lactobacillus kionensis       | DSM_19906  | 6           | DSM_19906GL002469, DSM_19906GL002006, DSM_19906GL002007   | 1          | DSM_19906GL001744                                       | No  | 0         | 0         |                                                         |
| Lactobacillus diolivorans     | DSM_14421  | 4           | DSM_14421GL000349, DSM_14421GL002640, DSM_14421GL002641   | 2          | DSM_14421GL002029, DSM_14421GL002101                    | Yes | 0         | 0         |                                                         |
| Lactobacillus ligandii        | DSM_20176  | 2           | DSM_20176GL001813, DSM_20176GL000973                      | 1          | DSM_20176GL000386                                       | No  | 0         | 0         |                                                         |
| Lactobacillus ferrireducens   | DSM_18382  | 1           | DSM_18382GL000356                                         | 1          | DSM_18382GL002163                                       | Yes | 0         | 0         |                                                         |
| Lactobacillus parafarraginis  | DSM_18390  | 7           | DSM_18390GL001600, DSM_18390GL000527, DSM_18390GL000528   | 2          | DSM_18390GL002766, DSM_18390GL001314                    | No  | 0         | 0         |                                                         |
| Lactobacillus senisensis      | DSM_24302  | 3           | DSM_24302GL001476, DSM_24302GL001193, DSM_24302GL001194   | 3          | DSM_24302GL001196, DSM_24302GL001052, DSM_24302GL001053 | Yes | 1         | 1         | DSM_24302GL001193, DSM_24302GL001196                    |
| Lactobacillus orezensis       | DSM_23829  | 0           |                                                           | 1          | DSM_23829GL001214                                       | No  | 0         | 0         |                                                         |
| Lactobacillus kunkaei         | DSM_12361  | 6           | DSM_12361GL001115, DSM_12361GL001310, DSM_12361GL001311   | 1          | DSM_12361GL001048                                       | No  | 0         | 0         |                                                         |
| Lactobacillus florani         | DSM_22689  | 6           | DSM_22689GL000154, DSM_22689GL000095, DSM_22689GL000096   | 1          | DSM_22689GL000108                                       | No  | 0         | 0         |                                                         |
| Lactobacillus lindneri        | DSM_20690  | 6           | DSM_20690GL001120, DSM_20690GL001342, DSM_20690GL001343   | 1          | DSM_20690GL000658                                       | No  | 0         | 0         |                                                         |
| Lactobacillus safraniae       | DSM_20451  | 4           | DSM_20451GL000977, DSM_20451GL002020, DSM_20451GL002021   | 1          | DSM_20451GL000270                                       | No  | 0         | 0         |                                                         |
| Lactobacillus fructivorans    | ATCC_27394 | 9           | ATCC_27394GL000693, ATCC_27394GL000688, ATCC_27394        | 1          | ATCC_27394GL000683                                      | Yes | 0         | 0         |                                                         |
| Lactobacillus homohiochii     | DSM_20571  | 9           | DSM_20571GL000572, DSM_20571GL000664, DSM_20571GL000665   | 1          | DSM_20571GL000680                                       | Yes | 0         | 0         |                                                         |
| Lactobacillus fructivorans    | DSM_20350  | 8           | DSM_20350GL000774, DSM_20350GL000229, DSM_20350GL000230   | 1          | DSM_20350GL001071                                       | Yes | 0         | 0         |                                                         |
| Lactobacillus fructivorans    | DSM_20203  | 8           | DSM_20203GL001276, DSM_20203GL000494, DSM_20203GL000495   | 1          | DSM_20203GL000504                                       | Yes | 0         | 0         |                                                         |
| Podococcus argentinicus       | DSM_23026  | 4           | DSM_23026GL001175, DSM_23026GL000894, DSM_23026GL000895   | 1          | DSM_23026GL000528                                       | No  | 0         | 0         |                                                         |
| Podococcus clausenii          | DSM_14800  | 3           | DSM_14800GL000637, DSM_14800GL001642, DSM_14800GL001643   | 2          | DSM_14800GL001036, DSM_14800GL001113                    | Yes | 1         | 1         | DSM_14800GL001113, DSM_14800GL001115                    |
| Podococcus pentoseus          | DSM_20356  | 3           | DSM_20356GL000909, DSM_20356GL000913, DSM_20356GL000914   | 1          | DSM_20356GL000314                                       | No  | 0         | 0         |                                                         |
| Podococcus stilisii           | DSM_18001  | 0           |                                                           | 1          | DSM_18001GL000326                                       | No  | 0         | 0         |                                                         |
| Podococcus lotii              | DSM_19927  | 3           | DSM_19927GL001047, DSM_19927GL001900, DSM_19927GL001901   | 1          | DSM_19927GL001675                                       | Yes | 0         | 0         |                                                         |
| Podococcus acidilactici       | ASI_2096G  | 3           | ASI_2096GGL001049, ASI_2096GGL001783, ASI_2096GGL000415   | 1          | ASI_2096GGL000951                                       | No  | 0         | 0         |                                                         |
| Podococcus ethanolidurans     | DSM_22301  | 9           | DSM_22301GL000128, DSM_22301GL000049, DSM_22301GL000050   | 4          | DSM_22301GL001131, DSM_22301GL000126, DSM_22301GL001909 | Yes | 1         | 1         | DSM_22301GL000125, DSM_22301GL001028                    |
| Podococcus cellicola          | DSM_17357  | 7           | DSM_17357GL000421, DSM_17357GL001523, DSM_17357GL001524   | 2          | DSM_17357GL001526, DSM_17357GL001909                    | No  | 0         | 0         |                                                         |
| Podococcus damnosus           | DSM_20331  | 10          | DSM_20331GL001090, DSM_20331GL001685, DSM_20331GL001686   | 3          | DSM_20331GL001092, DSM_20331GL001093, DSM_20331GL001903 | Yes | 1         | 1         | DSM_20331GL001090, DSM_20331GL001903                    |
| Podococcus inopinatus         | DSM_20285  | 10          | DSM_20285GL000864, DSM_20285GL000210, DSM_20285GL000211   | 4          | DSM_20285GL001776, DSM_20285GL000520, DSM_20285GL000521 | Yes | 1         | 1         | DSM_20285GL000546, DSM_20285GL000549                    |
| Podococcus parvulus           | DSM_20332  | 10          | DSM_20332GL002774, DSM_20332GL0013420, DSM_20332GL0013421 | 6          | DSM_20332GL000316, DSM_20332GL001496, DSM_20332GL001497 | Yes | 1         | 2         | DSM_20332GL000316, DSM_20332GL003316, DSM_20332GL003417 |
| Carnobacterium malaromaticum  | DSM_20370  | 22          | DSM_20370GL003263, DSM_20370GL0010714, DSM_20370GL0010715 | 4          | DSM_20370GL003099, DSM_20370GL003066, DSM_20370GL003067 | Yes | 0         | 0         |                                                         |
| Carnobacterium malaromaticum  | DSM_20342  | 27          | DSM_20342GL002886, DSM_20342GL001571, DSM_20342GL001572   | 7          | DSM_20342GL001625, DSM_20342GL002378, DSM_20342GL002379 | Yes | 1         | 1         | DSM_20342GL002941, DSM_20342GL002944                    |
| Carnobacterium malaromaticum  | DSM_20722  | 22          | DSM_20722GL002044, DSM_20722GL001429, DSM_20722GL001430   | 7          | DSM_20722GL000754, DSM_20722GL001730, DSM_20722GL001731 | Yes | 1         | 1         | DSM_20722GL000754, DSM_20722GL000757                    |
| Carnobacterium divergens      | DSM_20623  | 18          | DSM_20623GL001163, DSM_20623GL000792, DSM_20623GL000793   | 4          | DSM_20623GL001820, DSM_20623GL001147, DSM_20623GL001148 | No  | 0         | 0         |                                                         |
| Lactococcus lactis            | LMG_7760   | 7           | LMG_7760GL001946, LMG_7760GL001608, LMG_7760GL001609      | 2          | LMG_7760GL001539, LMG_7760GL001947                      | Yes | 1         | 1         | LMG_7760GL001946, LMG_7760GL001949                      |
| Atopobium minutum             | DSM_20586  | 9           | DSM_20586GL001354, DSM_20586GL000632, DSM_20586GL000633   | 1          | DSM_20586GL001167                                       | No  | 0         | 0         |                                                         |
| Olsenella sili                | DSM_7084   | 5           | DSM_7084GL001434, DSM_7084GL000839, DSM_7084GL000840      | 2          | DSM_7084GL001746, DSM_7084GL001525                      | Yes | 1         | 1         | DSM_7084GL001746, DSM_7084GL001749                      |
| Atopobium ritae               | DSM_7090   | 0           |                                                           | 1          | DSM_7090GL000687                                        | No  | 0         | 0         |                                                         |
| <b>Total</b>                  |            | <b>1628</b> |                                                           | <b>357</b> |                                                         |     | <b>51</b> | <b>67</b> |                                                         |

Footnote: The gene sequences for all locus tags listed above are provided as supplementary datasets 3,4 and

\* Cells colored in light gray indicate strain harboring at least 1 plus gene cluster with a similar gene order a *L. rhamnosus* strain GG.

**Table S6. Distribution and abundance of cell envelope proteins and associated anchoring domains and motifs**

| Species name                                  | StrainID     | CEPs | Cell anchor type |      |   |
|-----------------------------------------------|--------------|------|------------------|------|---|
|                                               |              |      | LPxTG            | SLAP | T |
| Kandleria vitulina                            | DSM-20405    | 0    | 0                | 0    | 0 |
| Lactobacillus kimchiensis                     | DSM-24716    | 0    | 0                | 0    | 0 |
| Lactobacillus mindensis                       | DSM-14500    | 0    | 0                | 0    | 0 |
| Lactobacillus nantensis                       | DSM-16982    | 0    | 0                | 0    | 0 |
| Lactobacillus crustorum                       | LMG-23699    | 0    | 0                | 0    | 0 |
| Lactobacillus crustorum                       | JCM-15951    | 0    | 0                | 0    | 0 |
| Lactobacillus futsaii                         | JCM-17355    | 0    | 0                | 0    | 0 |
| Lactobacillus farciminis                      | DSM-20184    | 0    | 0                | 0    | 0 |
| Lactobacillus alimentarius                    | DSM-20249    | 0    | 0                | 0    | 0 |
| Lactobacillus paralimentarius                 | DSM-19674    | 0    | 0                | 0    | 0 |
| Lactobacillus paralimentarius                 | DSM-13961    | 0    | 0                | 0    | 0 |
| Lactobacillus paralimentarius                 | DSM-13238    | 0    | 0                | 0    | 0 |
| Lactobacillus tucseti                         | DSM-20183    | 0    | 0                | 0    | 0 |
| Lactobacillus nodensis                        | DSM-19682    | 0    | 0                | 0    | 0 |
| Lactobacillus versmoldensis                   | DSM-14857    | 0    | 0                | 0    | 0 |
| Lactobacillus floricola                       | DSM-23037    | 0    | 0                | 0    | 0 |
| Lactobacillus acidophilus                     | DSM-20079    | 1    | 0                | 1    | 0 |
| Lactobacillus amylovorus                      | DSM-20531    | 0    | 0                | 0    | 0 |
| Lactobacillus amylovorus                      | DSM-16698    | 0    | 0                | 0    | 0 |
| Lactobacillus kitasatonis                     | DSM-16761    | 0    | 0                | 0    | 0 |
| Lactobacillus kefiranofaciens kefiranofaciens | DSM-5016     | 2    | 0                | 2    | 0 |
| Lactobacillus kefiranofaciens kefirgranum     | DSM-10550    | 0    | 0                | 0    | 0 |
| Lactobacillus ultunensis                      | DSM-16047    | 1    | 0                | 1    | 0 |
| Lactobacillus helveticus                      | LMG-22464    | 1    | 0                | 1    | 0 |
| Lactobacillus helveticus                      | CGMCC-1.1877 | 1    | 0                | 1    | 0 |
| Lactobacillus gallinarum                      | DSM-10532    | 1    | 0                | 1    | 0 |
| Lactobacillus crispatus                       | DSM-20584    | 0    | 0                | 0    | 0 |
| Lactobacillus acetotolerans                   | DSM-20749    | 0    | 0                | 0    | 0 |
| Lactobacillus intestinalis                    | DSM-6629     | 1    | 0                | 1    | 0 |
| Lactobacillus hamsteri                        | DSM-5661     | 0    | 0                | 0    | 0 |
| Lactobacillus amyolyticus                     | DSM-11664    | 0    | 0                | 0    | 0 |
| Lactobacillus kalixensis                      | DSM-16043    | 1    | 0                | 1    | 0 |
| Lactobacillus gigeriorum                      | DSM-23908    | 1    | 0                | 1    | 0 |
| Lactobacillus pasteurii                       | DSM-23907    | 0    | 0                | 0    | 0 |
| Lactobacillus delbrueckii jakobsenii          | DSM-26046    | 1    | 0                | 1    | 0 |
| Lactobacillus delbrueckii lactis              | DSM-20072    | 1    | 0                | 1    | 0 |
| Lactobacillus delbrueckii bulgaricus          | DSM-20081    | 1    | 0                | 1    | 0 |
| Lactobacillus delbrueckii delbrueckii         | DSM-20074    | 1    | 0                | 1    | 0 |
| Lactobacillus delbrueckii indicus             | DSM-15996    | 1    | 0                | 1    | 0 |
| Lactobacillus equicursoris                    | DSM-19284    | 1    | 0                | 1    | 0 |
| Lactobacillus jensenii                        | DSM-20557    | 0    | 0                | 0    | 0 |
| Lactobacillus psittaci                        | DSM-15354    | 0    | 0                | 0    | 0 |
| Lactobacillus hominis                         | DSM-23910    | 1    | 0                | 1    | 0 |
| Lactobacillus taiwanensis                     | DSM-21401    | 1    | 1                | 0    | 0 |
| Lactobacillus johnsonii                       | ATCC-33200   | 0    | 0                | 0    | 0 |
| Lactobacillus gasseri                         | ATCC-33323   | 0    | 0                | 0    | 0 |
| Lactobacillus iners                           | DSM-13335    | 0    | 0                | 0    | 0 |
| Lactobacillus amylophilus                     | DSM-20534    | 0    | 0                | 0    | 0 |
| Lactobacillus amylophilus                     | DSM-20533    | 0    | 0                | 0    | 0 |
| Lactobacillus dextrinicus                     | DSM-20335    | 0    | 0                | 0    | 0 |
| Lactobacillus concavus                        | DSM-17758    | 1    | 1                | 0    | 0 |
| Lactobacillus composti                        | DSM-18527    | 0    | 0                | 0    | 0 |
| Lactobacillus harbinensis                     | DSM-16991    | 0    | 0                | 0    | 0 |
| Lactobacillus perolens                        | DSM-12744    | 1    | 0                | 0    | 1 |
| Lactobacillus camelliae                       | DSM-22697    | 2    | 2                | 0    | 0 |
| Lactobacillus nasuensis                       | JCM-17158    | 1    | 1                | 0    | 0 |
| Lactobacillus manihotivorans                  | DSM-13343    | 1    | 1                | 0    | 0 |
| Lactobacillus paracasei paracasei             | DSM-5622     | 2    | 2                | 0    | 0 |
| Lactobacillus casei                           | DSM-20011    | 1    | 1                | 0    | 0 |
| Lactobacillus paracasei tolerans              | DSM-20258    | 0    | 0                | 0    | 0 |
| Lactobacillus zeae                            | DSM-20178    | 2    | 2                | 0    | 0 |
| Lactobacillus rhamnosus                       | DSM-20021    | 2    | 2                | 0    | 0 |
| Lactobacillus saniviri                        | DSM-24301    | 0    | 0                | 0    | 0 |
| Lactobacillus brantae                         | DSM-23927    | 0    | 0                | 0    | 0 |
| Lactobacillus thailandensis                   | DSM-22698    | 0    | 0                | 0    | 0 |
| Lactobacillus pantheris                       | DSM-15945    | 1    | 1                | 0    | 0 |
| Lactobacillus sharpeae                        | DSM-20505    | 0    | 0                | 0    | 0 |
| Lactobacillus selangorensis                   | DSM-13344    | 0    | 0                | 0    | 0 |
| Lactobacillus selangorensis                   | ATCC-BAA-66  | 0    | 0                | 0    | 0 |
| Lactobacillus graminis                        | DSM-20719    | 0    | 0                | 0    | 0 |
| Lactobacillus curvatus                        | DSM-20019    | 0    | 0                | 0    | 0 |
| Lactobacillus sakei sakei                     | DSM-20017    | 0    | 0                | 0    | 0 |
| Lactobacillus sakei carnosus                  | DSM-15831    | 0    | 0                | 0    | 0 |
| Lactobacillus fuchuensis                      | DSM-14340    | 0    | 0                | 0    | 0 |
| Lactobacillus rennini                         | DSM-20253    | 0    | 0                | 0    | 0 |
| Lactobacillus coryniformis torquens           | DSM-20004    | 0    | 0                | 0    | 0 |
| Lactobacillus coryniformis coryniformis       | DSM-20001    | 0    | 0                | 0    | 0 |
| Lactobacillus bifermmentans                   | DSM-20003    | 0    | 0                | 0    | 0 |
| Lactobacillus ceti                            | DSM-22408    | 0    | 0                | 0    | 0 |
| Lactobacillus saerimneri                      | DSM-16049    | 0    | 0                | 0    | 0 |
| Lactobacillus animalis                        | DSM-20602    | 1    | 1                | 0    | 0 |
| Lactobacillus murinus                         | DSM-20452    | 1    | 1                | 0    | 0 |
| Lactobacillus apodemii                        | DSM-16634    | 1    | 1                | 0    | 0 |
| Lactobacillus ruminis                         | DSM-20403    | 1    | 1                | 0    | 0 |
| Lactobacillus agilis                          | DSM-20509    | 0    | 0                | 0    | 0 |
| Lactobacillus equi                            | DSM-15833    | 1    | 1                | 0    | 0 |
| Lactobacillus salivarius                      | DSM-20555    | 1    | 1                | 0    | 0 |
| Lactobacillus hayakitensis                    | DSM-18933    | 0    | 0                | 0    | 0 |
| Lactobacillus pobuzihii                       | NBRC-103219  | 0    | 0                | 0    | 0 |



|                                         |               |   |   |   |   |
|-----------------------------------------|---------------|---|---|---|---|
| Lactobacillus pobuzihii.Chen            | KCTC-13174    | 0 | 0 | 0 | 0 |
| Lactobacillus acidipiscis               | DSM-15836     | 0 | 0 | 0 | 0 |
| Lactobacillus acidipiscis               | DSM-15353     | 0 | 0 | 0 | 0 |
| Lactobacillus aviarius aviarius         | DSM-20655     | 0 | 0 | 0 | 0 |
| Lactobacillus aviarius araffinosus      | DSM-20653     | 0 | 0 | 0 | 0 |
| Lactobacillus sucicola                  | DSM-21376     | 0 | 0 | 0 | 0 |
| Lactobacillus aquaticus                 | DSM-21051     | 0 | 0 | 0 | 0 |
| Lactobacillus uvarum                    | DSM-19971     | 0 | 0 | 0 | 0 |
| Lactobacillus capillatus                | DSM-19910     | 0 | 0 | 0 | 0 |
| Lactobacillus cacaonum                  | DSM-21116     | 0 | 0 | 0 | 0 |
| Lactobacillus mali                      | DSM-20444     | 0 | 0 | 0 | 0 |
| Lactobacillus mali                      | ATCC-27304    | 0 | 0 | 0 | 0 |
| Lactobacillus hordei                    | DSM-19519     | 0 | 0 | 0 | 0 |
| Lactobacillus oeni                      | DSM-19972     | 0 | 0 | 0 | 0 |
| Lactobacillus satsumensis               | DSM-16230     | 0 | 0 | 0 | 0 |
| Lactobacillus vini                      | DSM-20605     | 0 | 0 | 0 | 0 |
| Lactobacillus ghanensis                 | DSM-18630     | 0 | 0 | 0 | 0 |
| Lactobacillus nagelii                   | DSM-13675     | 0 | 0 | 0 | 0 |
| Lactobacillus algidus                   | DSM-15638     | 0 | 0 | 0 | 0 |
| Lactobacillus fabifermentans            | DSM-21115     | 0 | 0 | 0 | 0 |
| Lactobacillus xiangfangensis            | LMG-26013     | 0 | 0 | 0 | 0 |
| Lactobacillus pentosus                  | DSM-20314     | 0 | 0 | 0 | 0 |
| Lactobacillus plantarum argenteratensis | DSM-16365     | 0 | 0 | 0 | 0 |
| Lactobacillus plantarum                 | DSM-13273     | 0 | 0 | 0 | 0 |
| Lactobacillus plantarum plantarum       | CGMCC-1.2437  | 0 | 0 | 0 | 0 |
| Lactobacillus paraplantarum             | DSM-10667     | 0 | 0 | 0 | 0 |
| Lactobacillus siliginis                 | DSM-22696     | 0 | 0 | 0 | 0 |
| Lactobacillus rossiae                   | DSM-15814     | 0 | 0 | 0 | 0 |
| Weissella viridescens                   | DSM-20410     | 0 | 0 | 0 | 0 |
| Weissella minor                         | DSM-20014     | 0 | 0 | 0 | 0 |
| Weissella halotolerans                  | DSM-20190     | 0 | 0 | 0 | 0 |
| Weissella confusa                       | DSM-20196     | 0 | 0 | 0 | 0 |
| Weissella kandleri                      | DSM-20593     | 0 | 0 | 0 | 0 |
| Oenococcus oeni                         | ATCC-BAA-1163 | 0 | 0 | 0 | 0 |
| Oenococcus kitaharae                    | DSM-17330     | 0 | 0 | 0 | 0 |
| Leuconostoc fallax                      | KCTC-3537     | 0 | 0 | 0 | 0 |
| Leuconostoc pseudomesenteroides         | 4882-         | 1 | 0 | 0 | 1 |
| Leuconostoc mesenteroides               | ATCC-8293     | 0 | 0 | 0 | 0 |
| Leuconostoc mesenteroides cremoris      | ATCC-19254    | 0 | 0 | 0 | 0 |
| Leuconostoc carnosum                    | JB16-         | 0 | 0 | 0 | 0 |
| Leuconostoc argentinum                  | KCTC-3773     | 0 | 0 | 0 | 0 |
| Leuconostoc citreum                     | KM20-         | 0 | 0 | 0 | 0 |
| Leuconostoc gelidum                     | KCTC-3527     | 0 | 0 | 0 | 0 |
| Leuconostoc gasicomitatum               | LMG-18811     | 0 | 0 | 0 | 0 |
| Leuconostoc kimchii                     | IMSNU-11154   | 0 | 0 | 0 | 0 |
| Fructobacillus fructosus                | DSM-20349     | 0 | 0 | 0 | 0 |
| Lactobacillus pontis                    | DSM-8475      | 0 | 0 | 0 | 0 |
| Lactobacillus panis                     | DSM-6035      | 0 | 0 | 0 | 0 |
| Lactobacillus oris                      | DSM-4864      | 0 | 0 | 0 | 0 |
| Lactobacillus antri                     | DSM-16041     | 0 | 0 | 0 | 0 |
| Lactobacillus reuteri                   | DSM-20016     | 0 | 0 | 0 | 0 |
| Lactobacillus vaginalis                 | DSM-5837      | 0 | 0 | 0 | 0 |
| Lactobacillus frumenti                  | DSM-13145     | 0 | 0 | 0 | 0 |
| Lactobacillus fermentum                 | DSM-20055     | 0 | 0 | 0 | 0 |
| Lactobacillus equigenerosi              | DSM-18793     | 0 | 0 | 0 | 0 |
| Lactobacillus gastricus                 | DSM-16045     | 0 | 0 | 0 | 0 |
| Lactobacillus ingluviei                 | DSM-15946     | 0 | 0 | 0 | 0 |
| Lactobacillus ingluviei                 | DSM-14792     | 0 | 0 | 0 | 0 |
| Lactobacillus secaliphilus              | DSM-17896     | 0 | 0 | 0 | 0 |
| Lactobacillus coleohominis              | DSM-14060     | 0 | 0 | 0 | 0 |
| Lactobacillus mucosae                   | DSM-13345     | 0 | 0 | 0 | 0 |
| Lactobacillus oligofermentans           | DSM-15707     | 0 | 0 | 0 | 0 |
| Lactobacillus hokkaidonensis            | DSM-26202     | 0 | 0 | 0 | 0 |
| Lactobacillus suebicus                  | DSM-5007      | 0 | 0 | 0 | 0 |
| Lactobacillus vaccinofermentans         | DSM-20634     | 0 | 0 | 0 | 0 |
| Lactobacillus parabravis                | LMG-11984     | 0 | 0 | 0 | 0 |
| Lactobacillus parabravis                | ATCC-53295    | 0 | 0 | 0 | 0 |
| Lactobacillus hammesii                  | DSM-16381     | 0 | 0 | 0 | 0 |
| Lactobacillus paucivorans               | DSM-22467     | 0 | 0 | 0 | 0 |
| Lactobacillus senmaizukei               | DSM-21775     | 0 | 0 | 0 | 0 |
| Lactobacillus brevis                    | DSM-20054     | 0 | 0 | 0 | 0 |
| Lactobacillus koreensis                 | JCM-16448     | 0 | 0 | 0 | 0 |
| Lactobacillus zymae                     | DSM-19395     | 0 | 0 | 0 | 0 |
| Lactobacillus acidifarinae              | DSM-19394     | 0 | 0 | 0 | 0 |
| Lactobacillus namurensis                | DSM-19117     | 0 | 0 | 0 | 0 |
| Lactobacillus spicheri                  | DSM-15429     | 0 | 0 | 0 | 0 |
| Lactobacillus kimchicus                 | JCM-15530     | 0 | 0 | 0 | 0 |
| Lactobacillus similis                   | DSM-23365     | 0 | 0 | 0 | 0 |
| Lactobacillus odoratitofui              | DSM-19909     | 0 | 0 | 0 | 0 |
| Lactobacillus collinoides               | DSM-20515     | 1 | 1 | 0 | 0 |
| Lactobacillus paracollinoides           | DSM-15502     | 0 | 0 | 0 | 0 |
| Lactobacillus malefermentans            | DSM-5705      | 0 | 0 | 0 | 0 |
| Lactobacillus parabuchneri              | DSM-5707      | 1 | 0 | 0 | 1 |
| Lactobacillus parabuchneri              | DSM-15352     | 1 | 0 | 0 | 1 |
| Lactobacillus buchneri                  | DSM-20057     | 1 | 0 | 0 | 1 |
| Lactobacillus otakiensis                | DSM-19908     | 1 | 0 | 0 | 1 |
| Lactobacillus kefir                     | DSM-20587     | 1 | 0 | 0 | 1 |
| Lactobacillus parakefir                 | DSM-10551     | 2 | 0 | 0 | 2 |
| Lactobacillus sunkii                    | DSM-19904     | 1 | 0 | 0 | 1 |
| Lactobacillus rapi                      | DSM-19907     | 0 | 0 | 0 | 0 |
| Lactobacillus kisonensis                | DSM-19906     | 0 | 0 | 0 | 0 |
| Lactobacillus diolivorans               | DSM-14421     | 2 | 1 | 0 | 1 |
| Lactobacillus hilgardii                 | DSM-20176     | 0 | 0 | 0 | 0 |
| Lactobacillus farraginis                | DSM-18382     | 1 | 0 | 0 | 1 |

|                                |            |           |           |           |           |
|--------------------------------|------------|-----------|-----------|-----------|-----------|
| Lactobacillus parafarraginis   | DSM-18390  | 1         | 0         | 0         | 1         |
| Lactobacillus senioris         | DSM-24302  | 0         | 0         | 0         | 0         |
| Lactobacillus ozensis          | DSM-23829  | 0         | 0         | 0         | 0         |
| Lactobacillus kunkeei          | DSM-12361  | 0         | 0         | 0         | 0         |
| Lactobacillus florum           | DSM-22689  | 0         | 0         | 0         | 0         |
| Lactobacillus lindneri         | DSM-20690  | 0         | 0         | 0         | 0         |
| Lactobacillus sanfranciscensis | DSM-20451  | 0         | 0         | 0         | 0         |
| Lactobacillus fructivorans     | ATCC-27394 | 0         | 0         | 0         | 0         |
| Lactobacillus homohiochii      | DSM-20571  | 0         | 0         | 0         | 0         |
| Lactobacillus fructivorans     | DSM-20350  | 0         | 0         | 0         | 0         |
| Lactobacillus fructivorans     | DSM-20203  | 0         | 0         | 0         | 0         |
| Pediococcus argentiniticus     | DSM-23026  | 0         | 0         | 0         | 0         |
| Pediococcus clausenii          | DSM-14800  | 0         | 0         | 0         | 0         |
| Pediococcus pentosaceus        | DSM-20336  | 0         | 0         | 0         | 0         |
| Pediococcus stilesii           | DSM-18001  | 0         | 0         | 0         | 0         |
| Pediococcus lolii              | DSM-19927  | 0         | 0         | 0         | 0         |
| Pediococcus acidilactici       | AS1-2696   | 0         | 0         | 0         | 0         |
| Pediococcus ethanolidurans     | DSM-22301  | 1         | 1         | 0         | 0         |
| Pediococcus cellicola          | DSM-17757  | 1         | 1         | 0         | 0         |
| Pediococcus damnosus           | DSM-20331  | 0         | 0         | 0         | 0         |
| Pediococcus inopinatus         | DSM-20285  | 0         | 0         | 0         | 0         |
| Pediococcus parvulus           | DSM-20332  | 0         | 0         | 0         | 0         |
| Carnobacterium maltaromaticum  | DSM-20730  | 1         | 1         | 0         | 0         |
| Carnobacterium maltaromaticum  | DSM-20342  | 1         | 1         | 0         | 0         |
| Carnobacterium maltaromaticum  | DSM-20722  | 1         | 1         | 0         | 0         |
| Carnobacterium divergens       | DSM-20623  | 1         | 1         | 0         | 0         |
| Lactococcus lactis             | LMG-7760   | 0         | 0         | 0         | 0         |
| Atopobium minutum              | DSM-20586  | 2         | 2         | 0         | 0         |
| Olsenella uli                  | DSM-7084   | 0         | 0         | 0         | 0         |
| Atopobium rimae                | DSM-7090   | 0         | 0         | 0         | 0         |
| <b>Total</b>                   |            | <b>60</b> | <b>30</b> | <b>17</b> | <b>13</b> |

Table S7. CRISPR occurrence and diversity.

| Species Name                                         | StrainID     | CRISPR Type | CRISPR Repeat Sequence               | DR Length | No. of Spacers | Cas1 | Cas3 | Cas9 | Cas10 |
|------------------------------------------------------|--------------|-------------|--------------------------------------|-----------|----------------|------|------|------|-------|
| <i>Kandelia vitulina</i>                             | DSM-20405    | II          | GTTTATAGAGTGGTATTATTGACAGATACAAAAC   | 36        | 43             | Y    |      | Y    |       |
| <i>Lactobacillus kimchiensis</i>                     | DSM-24716    | Undefined   | GTGTTCCCAATATACATGGGGATGATTCT        | 29        | 3              |      |      |      |       |
| <i>Lactobacillus mindensis A</i>                     | DSM-14500    | II          | GTTTATAGAAAGTAACTCACTCAATTAAGAACC    | 35        | 25             | Y    |      | Y    |       |
| <i>Lactobacillus mindensis B</i>                     | DSM-14500    | Undefined   | GTGCTCCCAATAAACATGGGGATGATTCT        | 29        | 3              |      |      |      |       |
| <i>Lactobacillus nantensis</i>                       | DSM-16982    | II          | GTTTTGTACTCTCAAAGATTAGAAACAGTAAAC    | 36        | 22             | Y    |      | Y    |       |
| <i>Lactobacillus crustorum</i>                       | LMG-23699    | N/A         | None found                           |           |                |      |      |      |       |
| <i>Lactobacillus crustorum</i>                       | JCM-15951    | N/A         | None found                           |           |                |      |      |      |       |
| <i>Lactobacillus fuscus</i>                          | JCM-17355    | II          | GTTTTGTACTCTAAAGAACTAGAAATAGTAAAC    | 36        | 19             | Y    |      | Y    |       |
| <i>Lactobacillus farcininis A</i>                    | DSM-20184    | Undefined   | GTTTTGTACTCTAAAGAACTAGAAATAGTAAAC    | 36        | 4              |      |      |      |       |
| <i>Lactobacillus farcininis B</i>                    | DSM-20184    | II          | GTTTTAGAAAGTATGTCTTCTATTACTTAAGAAC   | 36        | 11             | Y    |      | Y    |       |
| <i>Lactobacillus alimentarius</i>                    | DSM-20249    | N/A         | None found                           |           |                |      |      |      |       |
| <i>Lactobacillus paralimentarius</i>                 | DSM-19674    | N/A         | None found                           |           |                |      |      |      |       |
| <i>Lactobacillus paralimentarius</i>                 | DSM-13961    | N/A         | None found                           |           |                |      |      |      |       |
| <i>Lactobacillus paralimentarius A</i>               | DSM-13238    | I           | GTACTCCCATGTATATGGGGATGATTCC         | 29        | 11             | Y    | Y    |      |       |
| <i>Lactobacillus paralimentarius B</i>               | DSM-13238    | Undefined   | GTACTCCCAATATACATGGGGATGATTCT        | 29        | 15             |      |      |      |       |
| <i>Lactobacillus tuceti</i>                          | DSM-20183    | II          | GTTTTGTACTCTTAAGGATTAGTAATGTAAC      | 36        | 15             | Y    |      | Y    |       |
| <i>Lactobacillus nodensis A</i>                      | DSM-19682    | II          | GTTTTAGAAAGTACGTCACTTCAATGTAAGAAC    | 36        | 9              | Y    |      | Y    |       |
| <i>Lactobacillus nodensis B</i>                      | DSM-19682    | II          | GTTTTAGTACTCTCAAGAAATAGTAACAGTAAAC   | 36        | 9              | Y    |      | Y    |       |
| <i>Lactobacillus versmoldensis</i>                   | DSM-14857    | II          | GTTTTAGATCTAAGTCACTCAATTAAGAAC       | 36        | 2              | Y    |      | Y    |       |
| <i>Lactobacillus floricola A</i>                     | DSM-23037    | II          | GTTTTAGAAAGTATGCAAACTCAATAGGTTAACC   | 36        | 5              | Y    |      | Y    |       |
| <i>Lactobacillus floricola B</i>                     | DSM-23037    | II          | GTTTCAGAAAGTATGCTATTGAAATAGTTAGGACT  | 36        | 5              | Y    |      | Y    |       |
| <i>Lactobacillus floricola C</i>                     | DSM-23037    | Undefined   | CITTTTTCTCCGCAATCCGGAGAGTGATCC       | 28        | 46             |      |      |      |       |
| <i>Lactobacillus acidophilus</i>                     | DSM-20079    | Undefined   | ATTTTCTCCAGTATGGAGGATGATCC           | 28        | 31             |      |      |      |       |
| <i>Lactobacillus amylovorus</i>                      | DSM-20531    | N/A         | None found                           |           |                |      |      |      |       |
| <i>Lactobacillus amylovorus</i>                      | DSM-16698    | I           | GTTTTTATTAACCTAAGAGAAATGTAAT         | 30        | 53             | Y    | Y    |      |       |
| <i>Lactobacillus kitatonis</i>                       | DSM-16761    | N/A         | None found                           |           |                |      |      |      |       |
| <i>Lactobacillus kefiranoferens kefiranoferens A</i> | DSM-5016     | Undefined   | GTGTTCTCCACGTATGGGAGGT               | 23        | 5              |      |      |      |       |
| <i>Lactobacillus kefiranoferens kefiranoferens B</i> | DSM-5016     | Undefined   | GTGTTCTCCACGTATGGGAGGTGATCCT         | 29        | 4              |      |      |      |       |
| <i>Lactobacillus kefiranoferens kefirgranum</i>      | DSM-10550    | I           | GTGTTCTCCACGTATGGGAGGTGATCC          | 28        | 61             | Y    | Y    |      |       |
| <i>Lactobacillus ultunensis</i>                      | DSM-16047    | N/A         | None found                           |           |                |      |      |      |       |
| <i>Lactobacillus helveticus</i>                      | LMG-22464    | I           | GTATTCTCCACGTATGGGAGGTGATCC          | 28        | 26             | Y    | Y    |      |       |
| <i>Lactobacillus helveticus</i>                      | CGMCC-1.1877 | I           | GTTTTTATTAACCTAAGAGAAATGTAAG         | 30        | 41             | Y    | Y    |      |       |
| <i>Lactobacillus gallinarum</i>                      | DSM-10532    | N/A         | None found                           |           |                |      |      |      |       |
| <i>Lactobacillus crispatus</i>                       | DSM-20584    | Undefined   | GTATTCTCCACGTATGGGAGGTGATCC          | 28        | 3              |      |      |      |       |
| <i>Lactobacillus acetotolerans A</i>                 | DSM-20749    | I           | GTATTCTCCACGTATGGGAGGTGATCCT         | 29        | 45             | Y    | Y    |      |       |
| <i>Lactobacillus acetotolerans B</i>                 | DSM-20749    | Undefined   | GTTTTAGATGATTGATGATCAATGAGGTTAGACC   | 36        | 9              |      |      |      |       |
| <i>Lactobacillus intestinalis A</i>                  | DSM-6629     | I           | GTATTCCCAACGTATGGGAGGTGATCC          | 28        | 7              | Y    | Y    |      |       |
| <i>Lactobacillus intestinalis B</i>                  | DSM-6629     | I           | GTATTCCCAACGTATGGGAGGTGATCC          | 28        | 13             | Y    | Y    |      |       |
| <i>Lactobacillus intestinalis C</i>                  | DSM-6629     | I           | GTTTTTATTAACCTAAGAGAAATGTAAT         | 30        | 9              | Y*   | Y*   |      |       |
| <i>Lactobacillus intestinalis D</i>                  | DSM-6629     | Undefined   | GGATCACCTCCACATACGGGAGAACAC          | 28        | 11             |      |      |      |       |
| <i>Lactobacillus hamsteri</i>                        | DSM-5661     | I           | GTATTCTCCACGTATGGGAGGTGATCC          | 28        | 43             | Y    | Y    |      |       |
| <i>Lactobacillus amylolyticus</i>                    | DSM-11664    | N/A         | None found                           |           |                |      |      |      |       |
| <i>Lactobacillus kalsxiensis</i>                     | DSM-16043    | II          | GTTTTAGACTGTGATGACTAGTAAAGTAAAC      | 36        | 4              | Y*   |      |      |       |
| <i>Lactobacillus eigerorum</i>                       | DSM-23908    | N/A         | None found                           |           |                |      |      |      |       |
| <i>Lactobacillus pasteurii</i>                       | DSM-23907    | I           | GTGTCACCACTAAGTGGGGGTGATCC           | 28        | 9              | Y    | Y    |      |       |
| <i>Lactobacillus delbrueckii jakobsenii</i>          | DSM-26046    | II          | GTTTTAGAAAGTGTCTATTCAATAAGGTTAAACC   | 36        | 11             | Y    |      | Y    |       |
| <i>Lactobacillus delbrueckii lactis</i>              | DSM-20072    | Undefined   | None found                           |           |                |      |      |      |       |
| <i>Lactobacillus delbrueckii bulgaricus</i>          | DSM-20081    | I           | GTATTCCCAACCAAGTGGGGGTGATCC          | 28        | 40             | Y    | Y    |      |       |
| <i>Lactobacillus delbrueckii delbrueckii</i>         | DSM-20074    | I           | GTATTCCCAACCAAGTGGGGGTGATCC          | 28        | 40             | Y    | Y    |      |       |
| <i>Lactobacillus delbrueckii indicus</i>             | DSM-15996    | I           | GTATTCCCAACCAAGTGGGGGTGATCC          | 28        | 39             | Y    | Y    |      |       |
| <i>Lactobacillus equicursoris</i>                    | DSM-19284    | I           | GTATTCCCTCGTATGAGGGGGTATCC           | 28        | 21             | Y    | Y    |      |       |
| <i>Lactobacillus jensenii</i>                        | DSM-20557    | Undefined   | None found                           |           |                |      |      |      |       |
| <i>Lactobacillus pstitaci</i>                        | DSM-15354    | II          | GTTTTAGAAAGTGTAAATCAGTAAGTTGAAAAAC   | 36        | 42             | Y    |      | Y    |       |
| <i>Lactobacillus hominis</i>                         | DSM-23910    | II          | GTTTTAGTATGTTAGATCAATAAGGTTAGATC     | 36        | 9              | Y    | Y    |      |       |
| <i>Lactobacillus taiwanensis</i>                     | DSM-21401    | N/A         | None found                           |           |                |      |      |      |       |
| <i>Lactobacillus johnsonii</i>                       | ATCC-33200   | N/A         | None found                           |           |                |      |      |      |       |
| <i>Lactobacillus gasseri</i>                         | ATCC-33323   | N/A         | None found                           |           |                |      |      |      |       |
| <i>Lactobacillus iners</i>                           | DSM-13335    | N/A         | None found                           |           |                |      |      |      |       |
| <i>Lactobacillus amylophilus</i>                     | DSM-20534    | Undefined   | GTTTTCCCGCACAGGCGGGGTGATCC           | 28        | 52             |      |      |      |       |
| <i>Lactobacillus amylophilus</i>                     | DSM-20533    | I           | GTTTTCCCGCACAGGCGGGGTGATCC           | 28        | 52             | Y    | Y    |      |       |
| <i>Lactobacillus dextrinicus</i>                     | DSM-20335    | I           | GTTTTTATTAACAAGATTTGAATGTAAT         | 30        | 100            | Y    | Y    |      |       |
| <i>Lactobacillus concavus</i>                        | DSM-17758    | II          | GTTTTAGAAAGTGTCTTCAATAGGTTAAGACT     | 36        | 68             | Y    |      | Y*   |       |
| <i>Lactobacillus composti A</i>                      | DSM-18527    | II          | GTCTCGAAGATGTGATGATCAATGATTTCAAGGAC  | 36        | 10             | Y    |      | Y    |       |
| <i>Lactobacillus composti B</i>                      | DSM-18527    | Undefined   | CGCAACTCTGTAGTGGGGAATGAAAT           | 30        | 5              |      |      |      |       |
| <i>Lactobacillus harbinensis</i>                     | DSM-16991    | II          | GTCCCAATTTAGCCGATTTGGAAGGATCCAATAGC  | 36        | 60             | Y*   |      | Y    |       |
| <i>Lactobacillus perolens A</i>                      | DSM-12744    | Undefined   | TTAGGGGTGCGTGAATGAAAG                | 22        | 9              |      |      |      |       |
| <i>Lactobacillus perolens B</i>                      | DSM-12744    | I           | GTCCGATCCCTGGGGGTGCGTGAATGAAAG       | 31        | 9              | Y    | Y    |      |       |
| <i>Lactobacillus camelliae</i>                       | DSM-22697    | N/A         | None found                           |           |                |      |      |      |       |
| <i>Lactobacillus nasuensis</i>                       | JCM-17158    | N/A         | None found                           |           |                |      |      |      |       |
| <i>Lactobacillus manihotivorans</i>                  | DSM-13343    | N/A         | None found                           |           |                |      |      |      |       |
| <i>Lactobacillus paracasei paracasei</i>             | DSM-5622     | N/A         | None found                           |           |                |      |      |      |       |
| <i>Lactobacillus casei</i>                           | DSM-20011    | I           | GTTTTCCCGCACAGGCGGGGTGATCC           | 28        | 20             | Y    | Y*   |      |       |
| <i>Lactobacillus paracasei tolerans</i>              | DSM-20258    | N/A         | None found                           |           |                |      |      |      |       |
| <i>Lactobacillus zeae</i>                            | DSM-20178    | I           | GTCCGAGTCTACGTGACTGCGTGAATGAAAT      | 32        | 86             | Y    | Y    |      |       |
| <i>Lactobacillus rhamnosus</i>                       | DSM-20021    | N/A         | None found                           |           |                |      |      |      |       |
| <i>Lactobacillus saniviri</i>                        | DSM-24301    | II          | GTTTTAGTGGATGTGATCAATAGGTTAAGCAC     | 36        | 58             | Y    |      | Y    |       |
| <i>Lactobacillus brantae</i>                         | DSM-23927    | I           | GTATTCCCGTGCATACGGGGGTGATCC          | 28        | 45             | Y    | Y    |      |       |
| <i>Lactobacillus thailandensis</i>                   | DSM-22698    | I           | GTGTTCCCGCAGGTGGGGGTGATCC            | 28        | 73             | Y    | Y    |      |       |
| <i>Lactobacillus pantheris</i>                       | DSM-15945    | N/A         | None found                           |           |                |      |      |      |       |
| <i>Lactobacillus sharpeae</i>                        | DSM-20505    | N/A         | None found                           |           |                |      |      |      |       |
| <i>Lactobacillus selangorensis</i>                   | DSM-13344    | I           | GTTTTTATTAACAATATGGAATGTAAT          | 30        | 33             | Y    | Y    |      |       |
| <i>Lactobacillus selangorensis A</i>                 | ATCC-BAA-66  | I           | GTTTTTATTAACAATATGGAATGTAAT          | 30        | 37             | Y    | Y    |      |       |
| <i>Lactobacillus selangorensis B</i>                 | ATCC-BAA-66  | Undefined   | GTTTTTATTAACAATATGGAATGTAAT          | 30        | 8              |      |      |      |       |
| <i>Lactobacillus graminis</i>                        | DSM-20719    | II          | GTTTTAGAAAGTATCAATCAATGAGTGTCAAC     | 36        | 35             | Y    |      | Y    |       |
| <i>Lactobacillus curvatus</i>                        | DSM-20019    | Undefined   | GTTTTAGAAAGTATCAATCAATGAGTGTCAAC     | 36        | 6              |      |      |      |       |
| <i>Lactobacillus sakei sakei</i>                     | DSM-20017    | N/A         | None found                           |           |                |      |      |      |       |
| <i>Lactobacillus sakei carnosus</i>                  | DSM-15831    | II          | GTTTTAGAAAGTATCAATCAATGAGTGTCAAC     | 36        | 21             | Y    |      | Y    |       |
| <i>Lactobacillus fuchuensis</i>                      | DSM-14340    | II          | GTTTTAGAAAGTATCAATCAATGAGTGTCAAC     | 36        | 27             | Y    |      | Y    |       |
| <i>Lactobacillus rennini A</i>                       | DSM-20253    | I           | GTCCGACTTATGATGGTGGTGAATGAAAT        | 32        | 24             | Y    | Y    |      |       |
| <i>Lactobacillus rennini B</i>                       | DSM-20253    | II          | GTTTTAGAAAGTATCAATCAATGAGTGTCAAC     | 36        | 12             | Y    |      | Y    |       |
| <i>Lactobacillus coryniformis torquens</i>           | DSM-20004    | II          | GCTATTGATCTCTCAAGTTTCACGTAATAAGTAAAC | 36        | 5              | Y    | Y    |      |       |
| <i>Lactobacillus coryniformis coryniformis</i>       | DSM-20001    | II          | GTTTTAGAAAGTATCAATCAATGAGTGTCAAC     | 36        | 30             | Y    |      | Y    |       |
| <i>Lactobacillus bififormis</i>                      | DSM-20003    | I           | GTATTCCCGCACAGGCGGGGTGATCC           | 28        | 118            | Y    | Y    |      |       |
| <i>Lactobacillus cetii</i>                           | DSM-22408    | II          | GTTTAAAGACTATCGAAGAACACACTTCAAAAC    | 36        | 16             | Y    |      | Y    |       |
| <i>Lactobacillus saerimneri</i>                      | DSM-16049    | II          | GTTTTGTACTCTGAAGAATCTAGTAAAGTAAAC    | 36        | 8              | Y*   |      | Y*   |       |
| <i>Lactobacillus animalis</i>                        | DSM-20602    | II          | GTTTTAGACTATGTTTGTATGACTCCAAAAC      | 36        | 51             | Y    |      | Y    |       |
| <i>Lactobacillus murinus</i>                         | DSM-20452    | N/A         | None found                           |           |                |      |      |      |       |
| <i>Lactobacillus apodemi</i>                         | DSM-16634    | II          | GTTTTAGACTATGATGTTTGTATGACTCCAAAAC   | 36        | 13             | Y    |      | Y    |       |
| <i>Lactobacillus ruminis A</i>                       | DSM-20403    | III         | GTTTTCGTCTCTCACTCGGAGATAGGTAATATC    | 36        | 13             | Y    |      |      | Y     |
| <i>Lactobacillus ruminis B</i>                       | DSM-20403    | I           | ATTTCAACTCACGCCCTATACAGAGGGGAC       | 33        | 29             | Y    | Y    |      |       |
| <i>Lactobacillus agilis A</i>                        | DSM-20509    | I           | CTTCCCCACACTAGTGGGGTAAATCC           | 28        | 35             | Y    | Y    |      |       |
| <i>Lactobacillus agilis B</i>                        | DSM-20509    | II          | GTCTCAAGATGTGTTAAATCAATGATGTTAGTAC   | 36        | 32             | Y    |      | Y    |       |
| <i>Lactobacillus agilis C</i>                        | DSM-20509    | Undefined   | GTTTACAATCTCTTAAGTAAATAGATTC         | 30        | 4              |      |      |      |       |
| <i>Lactobacillus equi A</i>                          | DSM-15833    | I           | GTGTTCTCACTGATGAGGGGTAAATCC          | 28        | 13             | Y*   |      |      |       |
| <i>Lactobacillus equi B</i>                          | DSM-15833    | I           | GTGTTCCCTGCTACGGGGGTGATCC            | 28        | 34             | Y    | Y    |      |       |
| <i>Lactobacillus equi C</i>                          | DSM-15833    | Undefined   | GTATTCCCTCACTGATGAGGGGTG             | 24        | 14             |      |      |      |       |
| <i>Lactobacillus salivarius</i>                      | DSM-20555    | III         | GTTTTGTCTCTTCACTCGGAGATATGTTCTTATT   | 36        | 11             | Y    |      |      | Y     |
| <i>Lactobacillus hayakitensis</i>                    | DSM-18933    | N/A         | None found                           |           |                |      |      |      |       |
| <i>Lactobacillus pobuzihii</i>                       | NBRC-103219  | N/A         | None found                           |           |                |      |      |      |       |
| <i>Lactobacillus pobuzihii Chen</i>                  | KCTC-13174   | N/A         | None found                           |           |                |      |      |      |       |
| <i>Lactobacillus acidipiscis</i>                     | DSM-15836    | N/A         | None found                           |           |                |      |      |      |       |
| <i>Lactobacillus acidipiscis A</i>                   | DSM-15353    | I           | GTATTCCCAACGTATGGGGGTGATCC           | 28        | 22             | Y    | Y    |      |       |
| <i>Lactobacillus acidipiscis B</i>                   | DSM-15353    | III         | GTCTCTCCCTAATACCGGGGTATCTAATACC      | 36        | 39             | Y    |      |      | Y     |
| <i>Lactobacillus avarius avarius</i>                 | DSM-20655    | N/A         | None found                           |           |                |      |      |      |       |
| <i>Lactobacillus avarius araffinosus</i>             | DSM-20653    | N/A         | None found                           |           |                |      |      |      |       |
| <i>Lactobacillus succicola A</i>                     | DSM-21376    | I           | GTATTCCCGCGGTATGGGGGTGATCC           | 28        | 16             | Y    | Y    |      |       |
| <i>Lactobacillus succicola B</i>                     | DSM-21376    | I           | GTTTTTATTAACAATATGGAATGTAAT          | 30        | 41             | Y    | Y    |      |       |
| <i>Lactobacillus aquaticus</i>                       | DSM-21051    | I           | GTATTCCCGCACAGGCGGGGTGATCC           | 28        | 26             | Y    | Y    |      |       |
| <i>Lactobacillus uvarum</i>                          | DSM-19971    | Undefined   | GTTTTAGAAAGTGTGTTAAATCAATGAGTGTAGAAC | 36        | 6              |      |      |      |       |
| <i>Lactobacillus capillatus</i>                      | DSM-19910    | I           | GTATTCCCGCACAGGCGGGGTGATCC           | 28        | 44             | Y    | Y    |      |       |
| <i>Lactobacillus cacoonum</i>                        | DSM-21116    | II          | GTTTTGTACTCTCAACATTTCTCATAGTAAAC     | 36        | 36             | Y    |      | Y    |       |
| <i>Lactobacillus mali</i>                            | DSM-20444    | N/A         | None found                           |           |                |      |      |      |       |
| <i>Lactobacillus mali</i>                            | ATCC-27304   | II          | GTTTTGTACTCTCAACATTTCTCATAGTAAAC     | 36        | 21             | Y    |      | Y    |       |
|                                                      |              |             |                                      |           |                |      |      |      |       |



**Table S8. Sequence information for the 27 core partial genes**

| PID*     | <i>L. salivarius</i> locus |          | COG      | Annotation                                           | Co-ordinates*    | Strand* | Length* |
|----------|----------------------------|----------|----------|------------------------------------------------------|------------------|---------|---------|
|          | Gene                       | tag*     |          |                                                      |                  |         |         |
| 90960991 | <i>dnaA</i>                | LSL_0001 | COG0593L | chromosomal replication initiation protein           | 1..1365          | +       | 454     |
| 90960994 | <i>recF</i>                | LSL_0004 | COG1195L | recombination protein F                              | 3309..4448       | +       | 379     |
| 90961461 | <i>murC</i>                | LSL_0485 | COG0773M | UDP-N-acetylmuramyl-L-alanine ligase                 | 533809..535140   | +       | 443     |
| 90961551 | <i>ribF</i>                | LSL_0575 | COG0196H | riboflavin kinase/FMN adenylyltransferase            | 616816..617772   | +       | 318     |
| 90961553 | <i>grpE</i>                | LSL_0577 | COG0576O | GrpE protein HSP-70 cofactor                         | 618942..619538   | +       | 198     |
| 90961554 | <i>dnaK</i>                | LSL_0578 | COG0443O | molecular chaperone DnaK                             | 619577..621424   | +       | 615     |
| 90961556 | <i>lepA</i>                | LSL_0580 | COG0481M | GTP-binding protein LepA                             | 622843..624672   | +       | 609     |
| 90961566 | <i>prfA</i>                | LSL_0590 | COG0216J | peptide chain release factor 1                       | 633672..634754   | +       | 360     |
| 90961572 | <i>atpF</i>                | LSL_0596 | COG0711C | ATP synthase subunit B                               | 638577..639104   | +       | 175     |
| 90961615 | <i>rpsO</i>                | LSL_0638 | COG0184J | 30S ribosomal protein S15                            | 681489..681758   | +       | 89      |
| 90962017 | <i>ileS</i>                | LSL_1042 | COG0060J | isoleucyl-tRNA synthetase                            | 1065203..1067998 | -       | 931     |
| 90962030 | <i>mraW</i>                | LSL_1055 | COG0275M | S-adenosyl-methyltransferase MraW                    | 1080326..1081270 | -       | 314     |
| 90962140 | <i>pgk</i>                 | LSL_1165 | COG0126G | phosphoglycerate kinase                              | 1199234..1200436 | -       | 400     |
| 90962149 | <i>uvrA</i>                | LSL_1174 | COG0178L | excinuclease ABC subunit A                           | 1208147..1210981 | -       | 944     |
| 90962150 | <i>uvrB</i>                | LSL_1175 | COG0556L | excinuclease ABC subunit B                           | 1211000..1213000 | -       | 666     |
| 90962161 | <i>secA</i>                | LSL_1186 | COG0653U | preprotein translocase subunit SecA                  | 1223594..1225957 | -       | 787     |
| 90962203 | <i>dnaX</i>                | LSL_1228 | COG2812L | DNA polymerase III subunit gamma/tau                 | 1260545..1262284 | -       | 579     |
| 90962211 | <i>rplL</i>                | LSL_1237 | COG0222J | 50S ribosomal protein L7/L12                         | 1270871..1271239 | -       | 122     |
| 90962242 | <i>galU</i>                | LSL_1268 | COG1210M | UTP--glucose-1-phosphate uridylyltransferase         | 1304213..1305085 | -       | 290     |
| 90962313 | <i>trmA</i>                | LSL_1341 | COG2265J | tRNA (Uracil-5-) -methyltransferase                  | 1392529..1393908 | -       | 459     |
| 90962321 | <i>pcrA</i>                | LSL_1349 | COG0210L | ATP-dependent DNA helicase                           | 1403083..1405317 | -       | 744     |
| 90962375 | <i>truA</i>                | LSL_1404 | COG0101J | tRNA pseudouridine synthase A                        | 1478890..1479660 | -       | 256     |
| 90962386 | <i>secY</i>                | LSL_1415 | COG0201U | preprotein translocase subunit SecY                  | 1486063..1487361 | -       | 432     |
| 90962403 | <i>rplB</i>                | LSL_1432 | COG0090J | 50S ribosomal protein L2                             | 1493766..1494599 | -       | 277     |
| 90962565 | <i>parB</i>                | LSL_1596 | COG1475K | chromosome partitioning protein, DNA-binding protein | 1676145..1677020 | -       | 291     |
| 90962568 | <i>gidB</i>                | LSL_1599 | COG0357M | 16S rRNA methyltransferase GidB                      | 1678668..1679393 | -       | 241     |
| 90962695 | <i>dnaB</i>                | LSL_1726 | COG0305L | replicative DNA helicase                             | 1807560..1808951 | -       | 463     |

\*These columns are provided according to the reference genome *L. salivarius* UCC118





**Table S10. Presence of sirtuin homologs in the 213 genomes analyzed**

| Species Name                                | StrainID     | SIR2 family proteins (homolog of mammalian SIRT1, |
|---------------------------------------------|--------------|---------------------------------------------------|
|                                             |              | SIR2L1, Sir2a)                                    |
| Kandleria vitulina                          | DSM-20405    | 2                                                 |
| Lactobacillus kimchiensis                   | DSM-24716    | 1                                                 |
| Lactobacillus mindensis                     | DSM-14500    | 1                                                 |
| Lactobacillus nantensis                     | DSM-16982    | 1                                                 |
| Lactobacillus crustorum                     | LMG-23699    | 1                                                 |
| Lactobacillus crustorum                     | JCM-15951    | 1                                                 |
| Lactobacillus futsaii                       | JCM-17355    | 3                                                 |
| Lactobacillus farciminis                    | DSM-20184    | 2                                                 |
| Lactobacillus alimentarius                  | DSM-20249    | 2                                                 |
| Lactobacillus paralimentarius               | DSM-19674    | 2                                                 |
| Lactobacillus paralimentarius               | DSM-13961    | 2                                                 |
| Lactobacillus paralimentarius               | DSM-13238    | 1                                                 |
| Lactobacillus tucseti                       | DSM-20183    | 2                                                 |
| Lactobacillus nodensis                      | DSM-19682    | 1                                                 |
| Lactobacillus versmoldensis                 | DSM-14857    | 3                                                 |
| Lactobacillus floricola                     | DSM-23037    | 0                                                 |
| Lactobacillus acidophilus                   | DSM-20079    | 1                                                 |
| Lactobacillus amylovorus                    | DSM-20531    | 1                                                 |
| Lactobacillus amylovorus                    | DSM-16698    | 1                                                 |
| Lactobacillus kitasatonis                   | DSM-16761    | 1                                                 |
| Lactobacillus kefirnofaciens kefirnofaciens | DSM-5016     | 3                                                 |
| Lactobacillus kefirnofaciens kefirgranum    | DSM-10550    | 3                                                 |
| Lactobacillus ultunensis                    | DSM-16047    | 4                                                 |
| Lactobacillus helveticus                    | LMG-22464    | 3                                                 |
| Lactobacillus helveticus                    | CGMCC-1.1877 | 3                                                 |
| Lactobacillus gallinarum                    | DSM-10532    | 1                                                 |
| Lactobacillus crispatus                     | DSM-20584    | 1                                                 |
| Lactobacillus acetotolerans                 | DSM-20749    | 1                                                 |
| Lactobacillus intestinalis                  | DSM-6629     | 1                                                 |
| Lactobacillus hamsteri                      | DSM-5661     | 3                                                 |
| Lactobacillus amyolyticus                   | DSM-11664    | 1                                                 |
| Lactobacillus kalixensis                    | DSM-16043    | 1                                                 |
| Lactobacillus gigeriorum                    | DSM-23908    | 1                                                 |
| Lactobacillus pasteurii                     | DSM-23907    | 1                                                 |
| Lactobacillus delbrueckii jakobsenii        | DSM-26046    | 1                                                 |
| Lactobacillus delbrueckii lactis            | DSM-20072    | 1                                                 |
| Lactobacillus delbrueckii bulgaricus        | DSM-20081    | 1                                                 |
| Lactobacillus delbrueckii delbrueckii       | DSM-20074    | 1                                                 |
| Lactobacillus delbrueckii indicus           | DSM-15996    | 1                                                 |
| Lactobacillus equicursoris                  | DSM-19284    | 1                                                 |
| Lactobacillus jensenii                      | DSM-20557    | 1                                                 |
| Lactobacillus psittaci                      | DSM-15354    | 1                                                 |
| Lactobacillus hominis                       | DSM-23910    | 1                                                 |
| Lactobacillus taiwanensis                   | DSM-21401    | 1                                                 |



|                                                |             |   |
|------------------------------------------------|-------------|---|
| <i>Lactobacillus johnsonii</i>                 | ATCC-33200  | 2 |
| <i>Lactobacillus gasseri</i>                   | ATCC-33323  | 1 |
| <i>Lactobacillus iners</i>                     | DSM-13335   | 0 |
| <i>Lactobacillus amylotrophicus</i>            | DSM-20534   | 1 |
| <i>Lactobacillus amylophilus</i>               | DSM-20533   | 1 |
| <i>Lactobacillus dextrinicus</i>               | DSM-20335   | 1 |
| <i>Lactobacillus concavus</i>                  | DSM-17758   | 1 |
| <i>Lactobacillus composti</i>                  | DSM-18527   | 1 |
| <i>Lactobacillus harbinensis</i>               | DSM-16991   | 1 |
| <i>Lactobacillus perolens</i>                  | DSM-12744   | 1 |
| <i>Lactobacillus camelliae</i>                 | DSM-22697   | 1 |
| <i>Lactobacillus nasuensis</i>                 | JCM-17158   | 1 |
| <i>Lactobacillus manihotivorans</i>            | DSM-13343   | 1 |
| <i>Lactobacillus paracasei paracasei</i>       | DSM-5622    | 1 |
| <i>Lactobacillus casei</i>                     | DSM-20011   | 1 |
| <i>Lactobacillus paracasei tolerans</i>        | DSM-20258   | 1 |
| <i>Lactobacillus zeae</i>                      | DSM-20178   | 2 |
| <i>Lactobacillus rhamnosus</i>                 | DSM-20021   | 2 |
| <i>Lactobacillus saniviri</i>                  | DSM-24301   | 1 |
| <i>Lactobacillus brantae</i>                   | DSM-23927   | 1 |
| <i>Lactobacillus thailandensis</i>             | DSM-22698   | 1 |
| <i>Lactobacillus pantheris</i>                 | DSM-15945   | 1 |
| <i>Lactobacillus sharpeae</i>                  | DSM-20505   | 0 |
| <i>Lactobacillus selangorensis</i>             | DSM-13344   | 1 |
| <i>Lactobacillus selangorensis</i>             | ATCC-BAA-66 | 1 |
| <i>Lactobacillus graminis</i>                  | DSM-20719   | 3 |
| <i>Lactobacillus curvatus</i>                  | DSM-20019   | 3 |
| <i>Lactobacillus sakei sakei</i>               | DSM-20017   | 0 |
| <i>Lactobacillus sakei carnosus</i>            | DSM-15831   | 0 |
| <i>Lactobacillus fuchuensis</i>                | DSM-14340   | 0 |
| <i>Lactobacillus rennini</i>                   | DSM-20253   | 1 |
| <i>Lactobacillus coryniformis torquens</i>     | DSM-20004   | 2 |
| <i>Lactobacillus coryniformis coryniformis</i> | DSM-20001   | 1 |
| <i>Lactobacillus bifermentans</i>              | DSM-20003   | 1 |
| <i>Lactobacillus ceti</i>                      | DSM-22408   | 1 |
| <i>Lactobacillus saerimneri</i>                | DSM-16049   | 0 |
| <i>Lactobacillus animalis</i>                  | DSM-20602   | 0 |
| <i>Lactobacillus murinus</i>                   | DSM-20452   | 0 |
| <i>Lactobacillus apodemi</i>                   | DSM-16634   | 1 |
| <i>Lactobacillus ruminis</i>                   | DSM-20403   | 1 |
| <i>Lactobacillus agilis</i>                    | DSM-20509   | 1 |
| <i>Lactobacillus equi</i>                      | DSM-15833   | 2 |
| <i>Lactobacillus salivarius</i>                | DSM-20555   | 1 |
| <i>Lactobacillus hayakitensis</i>              | DSM-18933   | 0 |
| <i>Lactobacillus pobuzihii</i>                 | NBRC-103219 | 1 |
| <i>Lactobacillus pobuzihii.Chen</i>            | KCTC-13174  | 1 |
| <i>Lactobacillus acidipiscis</i>               | DSM-15836   | 1 |

|                                                |              |   |
|------------------------------------------------|--------------|---|
| <i>Lactobacillus acidipiscis</i>               | DSM-15353    | 1 |
| <i>Lactobacillus aviarius aviarius</i>         | DSM-20655    | 1 |
| <i>Lactobacillus aviarius araffinosus</i>      | DSM-20653    | 1 |
| <i>Lactobacillus sucicola</i>                  | DSM-21376    | 1 |
| <i>Lactobacillus aquaticus</i>                 | DSM-21051    | 1 |
| <i>Lactobacillus uvarum</i>                    | DSM-19971    | 1 |
| <i>Lactobacillus capillatus</i>                | DSM-19910    | 1 |
| <i>Lactobacillus cacaonum</i>                  | DSM-21116    | 0 |
| <i>Lactobacillus mali</i>                      | DSM-20444    | 0 |
| <i>Lactobacillus mali</i>                      | ATCC-27304   | 0 |
| <i>Lactobacillus hordei</i>                    | DSM-19519    | 0 |
| <i>Lactobacillus oeni</i>                      | DSM-19972    | 1 |
| <i>Lactobacillus satsumensis</i>               | DSM-16230    | 1 |
| <i>Lactobacillus vini</i>                      | DSM-20605    | 1 |
| <i>Lactobacillus ghanensis</i>                 | DSM-18630    | 1 |
| <i>Lactobacillus nagelii</i>                   | DSM-13675    | 1 |
| <i>Lactobacillus algidus</i>                   | DSM-15638    | 0 |
| <i>Lactobacillus fabifermentans</i>            | DSM-21115    | 1 |
| <i>Lactobacillus xiangfangensis</i>            | LMG-26013    | 1 |
| <i>Lactobacillus pentosus</i>                  | DSM-20314    | 1 |
| <i>Lactobacillus plantarum argenteratensis</i> | DSM-16365    | 1 |
| <i>Lactobacillus plantarum</i>                 | DSM-13273    | 1 |
| <i>Lactobacillus plantarum plantarum</i>       | CGMCC-1.2437 | 1 |
| <i>Lactobacillus paraplantarum</i>             | DSM-10667    | 1 |
| <i>Lactobacillus siliginis</i>                 | DSM-22696    | 1 |
| <i>Lactobacillus rossiae</i>                   | DSM-15814    | 1 |
| <i>Weissella viridescens</i>                   | DSM-20410    | 0 |
| <i>Weissella minor</i>                         | DSM-20014    | 0 |
| <i>Weissella halotolerans</i>                  | DSM-20190    | 1 |
| <i>Weissella confusa</i>                       | DSM-20196    | 1 |
| <i>Weissella kandleri</i>                      | DSM-20593    | 0 |
| <i>Oenococcus oeni</i>                         | ATCC-BAA-116 | 1 |
| <i>Oenococcus kitaharae</i>                    | DSM-17330    | 1 |
| <i>Leuconostoc fallax</i>                      | KCTC-3537    | 0 |
| <i>Leuconostoc pseudomesenteroides</i>         | 4882         | 1 |
| <i>Leuconostoc mesenteroides</i>               | ATCC-8293    | 1 |
| <i>Leuconostoc mesenteroides cremoris</i>      | ATCC-19254   | 1 |
| <i>Leuconostoc carnosum</i>                    | JB16         | 0 |
| <i>Leuconostoc argentinum</i>                  | KCTC-3773    | 1 |
| <i>Leuconostoc citreum</i>                     | KM20         | 1 |
| <i>Leuconostoc gelidum</i>                     | KCTC-3527    | 0 |
| <i>Leuconostoc gasicomitatum</i>               | LMG-18811    | 0 |
| <i>Leuconostoc kimchii</i>                     | IMSNU-11154  | 0 |
| <i>Fructobacillus fructosus</i>                | DSM-20349    | 1 |
| <i>Lactobacillus pontis</i>                    | DSM-8475     | 1 |
| <i>Lactobacillus panis</i>                     | DSM-6035     | 2 |
| <i>Lactobacillus oris</i>                      | DSM-4864     | 1 |

|                                 |            |   |
|---------------------------------|------------|---|
| Lactobacillus antri             | DSM-16041  | 1 |
| Lactobacillus reuteri           | DSM-20016  | 1 |
| Lactobacillus vaginalis         | DSM-5837   | 1 |
| Lactobacillus frumenti          | DSM-13145  | 2 |
| Lactobacillus fermentum         | DSM-20055  | 1 |
| Lactobacillus equigenerosi      | DSM-18793  | 1 |
| Lactobacillus gastricus         | DSM-16045  | 1 |
| Lactobacillus ingluviei         | DSM-15946  | 1 |
| Lactobacillus ingluviei         | DSM-14792  | 1 |
| Lactobacillus secaliphilus      | DSM-17896  | 1 |
| Lactobacillus coleohominis      | DSM-14060  | 0 |
| Lactobacillus mucosae           | DSM-13345  | 1 |
| Lactobacillus oligofermentans   | DSM-15707  | 1 |
| Lactobacillus hokkaidonensis    | DSM-26202  | 1 |
| Lactobacillus suebicus          | DSM-5007   | 1 |
| Lactobacillus vaccinofermentans | DSM-20634  | 1 |
| Lactobacillus parabrevis        | LMG-11984  | 1 |
| Lactobacillus parabrevis        | ATCC-53295 | 1 |
| Lactobacillus hammesii          | DSM-16381  | 1 |
| Lactobacillus paucivorans       | DSM-22467  | 1 |
| Lactobacillus senmaizukei       | DSM-21775  | 1 |
| Lactobacillus brevis            | DSM-20054  | 1 |
| Lactobacillus korensis          | JCM-16448  | 1 |
| Lactobacillus zymae             | DSM-19395  | 1 |
| Lactobacillus acidifarinae      | DSM-19394  | 1 |
| Lactobacillus namurensis        | DSM-19117  | 1 |
| Lactobacillus spicheri          | DSM-15429  | 1 |
| Lactobacillus kimchicus         | JCM-15530  | 1 |
| Lactobacillus similis           | DSM-23365  | 1 |
| Lactobacillus odoratitofui      | DSM-19909  | 1 |
| Lactobacillus collinoides       | DSM-20515  | 1 |
| Lactobacillus paracollinoides   | DSM-15502  | 1 |
| Lactobacillus malefermentans    | DSM-5705   | 1 |
| Lactobacillus parabuchneri      | DSM-5707   | 1 |
| Lactobacillus parabuchneri      | DSM-15352  | 1 |
| Lactobacillus buchneri          | DSM-20057  | 1 |
| Lactobacillus otakiensis        | DSM-19908  | 1 |
| Lactobacillus kefirii           | DSM-20587  | 1 |
| Lactobacillus parakefirii       | DSM-10551  | 2 |
| Lactobacillus sunkii            | DSM-19904  | 2 |
| Lactobacillus rapi              | DSM-19907  | 1 |
| Lactobacillus kisonensis        | DSM-19906  | 1 |
| Lactobacillus diolivorans       | DSM-14421  | 1 |
| Lactobacillus hilgardii         | DSM-20176  | 1 |
| Lactobacillus farraginis        | DSM-18382  | 1 |
| Lactobacillus parafarraginis    | DSM-18390  | 2 |
| Lactobacillus senioris          | DSM-24302  | 1 |

|                                       |            |   |
|---------------------------------------|------------|---|
| <i>Lactobacillus ozensis</i>          | DSM-23829  | 1 |
| <i>Lactobacillus kunkeei</i>          | DSM-12361  | 1 |
| <i>Lactobacillus florum</i>           | DSM-22689  | 1 |
| <i>Lactobacillus lindneri</i>         | DSM-20690  | 1 |
| <i>Lactobacillus sanfranciscensis</i> | DSM-20451  | 1 |
| <i>Lactobacillus fructivorans</i>     | ATCC-27394 | 1 |
| <i>Lactobacillus homohiochii</i>      | DSM-20571  | 1 |
| <i>Lactobacillus fructivorans</i>     | DSM-20350  | 1 |
| <i>Lactobacillus fructivorans</i>     | DSM-20203  | 1 |
| <i>Pediococcus argentinicus</i>       | DSM-23026  | 0 |
| <i>Pediococcus clausenii</i>          | DSM-14800  | 0 |
| <i>Pediococcus pentosaceus</i>        | DSM-20336  | 0 |
| <i>Pediococcus stilesii</i>           | DSM-18001  | 0 |
| <i>Pediococcus lolii</i>              | DSM-19927  | 0 |
| <i>Pediococcus acidilactici</i>       | AS1-2696   | 0 |
| <i>Pediococcus ethanolidurans</i>     | DSM-22301  | 0 |
| <i>Pediococcus cellicola</i>          | DSM-17757  | 0 |
| <i>Pediococcus damnosus</i>           | DSM-20331  | 0 |
| <i>Pediococcus inopinatus</i>         | DSM-20285  | 0 |
| <i>Pediococcus parvulus</i>           | DSM-20332  | 0 |
| <i>Carnobacterium maltaromaticum</i>  | DSM-20730  | 0 |
| <i>Carnobacterium maltaromaticum</i>  | DSM-20342  | 0 |
| <i>Carnobacterium maltaromaticum</i>  | DSM-20722  | 0 |
| <i>Carnobacterium divergens</i>       | DSM-20623  | 1 |
| <i>Lactococcus lactis</i>             | LMG-7760   | 0 |
| <i>Atopobium minutum</i>              | DSM-20586  | 0 |
| <i>Olsenella uli</i>                  | DSM-7084   | 2 |
| <i>Atopobium rimae</i>                | DSM-7090   | 1 |

---







## 34 **Supplementary Notes**

### 35 **Supplementary Note 1**

#### 36 ***Lactobacillus* relatedness to other genera**

37 We also sequenced genomes of type strains from other genera associated with lactic  
38 acid bacteria (LAB) including *Carnobacterium* and *Lactococcus* and other genera previously  
39 misidentified as LAB, namely, *Atopobium*, *Kandleria* and *Olsenella*. *Carnobacterium* and  
40 *Lactococcus* form distinct branches and are classified in the families *Carnobacteriaceae* and  
41 *Streptococcaceae*, respectively, revealing closer genetic relatedness to genera other than  
42 *Lactobacillus*. *Carnobacterium* is closely related to *Melissococcus* and *Lactococcus* to  
43 *Streptococcus* (Fig. 1). This indicates that all currently known LAB descend from the same  
44 ancestor as proposed previously<sup>1</sup>. The un-relatedness of *Kandleria*, *Atopobium* and *Olsenella*  
45 and other LAB is confirmed, with a closer relationship of *Kandleria* with *Erysipelothrix* in the  
46 family *Erysipelotrichaceae* of the *Clostridium* subphylum cluster XVII of *Firmicutes*. *Atopobium*  
47 and *Olsenella* revealed the greatest genetic distance from the genus *Lactobacillus*; they  
48 belong to another phylum, *Actinobacteria*, which belongs to the high-GC, Gram-positive  
49 bacteria, the most closely related genus being *Coriobacterium*.

### 50 **Supplementary Note 2**

#### 51 **Validation of the core genome phylogeny**

52 We validated the branching order of the 73 core gene tree using alternative subsets of  
53 gene datasets. We inferred a tree of the *Lactobacillus* genus complex, rooted on *Lactococcus*  
54 *lactis*, comprised of 117 genes, and another tree of the *Lactobacillus* genus complex, rooted  
55 on the *Carnobacteria*, comprised of 121 genes. We found there were only 4 minor branching  
56 alterations. The robustness of the 73 core gene tree was also assessed using a range of  
57 different models. Models tested were the WAG, LG, JTT, mtREV and Dayhoff models. The  
58 resulting branching order of the strains was consistent across all the models with the exception  
59 of mtREV. With this model the positions of *L. salivarius* DSM\_20555, *L. hayakitensis*  
60 DSM\_18933 and *L. acetotolerans* DSM\_20749 underwent minor node exchanges within the  
61 same clade.

62 The impact of adding partial genes to the core gene dataset was assessed by inferring  
63 a phylogeny (Supplementary Fig. 19) from the 73 complete core genes with an additional 27  
64 partial core genes (listed in Supplementary Table 8) added to the dataset. The inferred  
65 topology was highly congruent with the 73 complete core gene tree with only three very minor  
66 branching alterations. Specifically, *L. koreensis* moved one branch within the *L. brevis*/*L.*  
67 *collinoides* group. Minor displacements were also observed for *L. kefiranofaciens* DSM\_5016  
68 and DSM\_10550 within the *L. delbrueckii* group and *L. salivarius* and *L. hayakitensis* within  
69 the *L. salivarius* group.



70 **Supplementary Note 3**  
71 **Relatedness of *Lactobacillus* species**

72 At the species level, the combination of ANI value and core genome phylogeny could  
73 be proposed as the basis for optimal taxonomic classification<sup>2</sup>, and its application could shed  
74 new light on several issues including species widely used in the food and probiotic industry. A  
75 long-debated case has been that of the *L. casei* group<sup>3</sup>. We propose that the species *L. casei*  
76 and *L. paracasei* should be combined into a single species, *L. casei*, because the pair-wise  
77 ANI values between the type strains of *L. casei* and two *L. paracasei* are 98~99%, larger than  
78 the “un-official” species’ cut-off value of 95%<sup>4</sup>, and these three strains clustered together as a  
79 monophyletic group (Fig. 2; Supplementary Fig. 20). The designation of *L. zeae* has been  
80 controversial and there are reports suggesting its classification into the species *L. casei*<sup>3,5</sup>.  
81 However, the ANI value between *L. casei* and *L. zeae* is only 77%~78%, which is similar to  
82 the value between *L. casei* and another well-defined species, *L. rhamnosus*. Therefore, our  
83 genomic analysis supports retaining *L. zeae* as a single species. Remarkably, ANI values  
84 seem not to be related to total DNA-DNA hybridization data reported previously<sup>5</sup> for similarities  
85 of *L. casei* type strain ATCC 393, which corresponds to the strain DSM 20011 included in this  
86 study.

87 The genus *Lactobacillus* was recently defined as 16 phylogroups (incl. *Pediococcus*),  
88 4 couples (groups containing only two species) and 10 single species<sup>6</sup>. Such delineations are  
89 generally supported by the phylogenetic relationships constructed here based on the core  
90 proteins, but two modifications are suggested (Fig. 2; Supplementary Fig. 18). Firstly, *L.*  
91 *camelliae* could be included in the *L. manihotivorans* group and not in the *L. delbrueckii* group,  
92 supported by a mean TNI value of <15% to the group, which is far lower than that within the  
93 other *L. delbrueckii* group species (79.5%). Moreover, *L. amylophilus* and *L. amylophilus*  
94 should also be classified as a single species, *L. amylophilus*, as the two type strains have an  
95 ANI value of approximately 100%, although multilocus analysis and DNA-DNA hybridization  
96 values suggested their separation.

97 **Supplementary Note 4**  
98 **Phylogenomics of glycolysis and hexose fermentation**

99 In species characterized by the presence of Pfk, the distribution of the pyruvate  
100 dehydrogenase operon (*Pdh*; composed of 4 genes) reflected carbohydrate metabolism since  
101 it is absent in 57% of obligately homofermentative species while it is present in facultatively  
102 heterofermentative members. Consistency was observed between *Pdh* distribution and  
103 phylogenetic groupings: 90% of the species of the *L. delbrueckii* group lack *pdh*, while  
104 members of groups like *L. salivarius*, *L. plantarum*, *L. casei* or *L. alimentarius* are  
105 characterized by presence of both *pfk* and *pdh*, although they belong to different phenotypic  
106 categorizations. Additionally, 80% of the species within the *L. delbrueckii* group lack

107 glucokinase, the first enzyme of the glycolytic pathway, except for the monophyletic subgroup  
108 formed by the *L. delbrueckii* and *L. equicursoris* species. For growth on glucose, a PTS  
109 transport system may obviate the need for this enzyme<sup>7</sup> and most of these species (79%) are  
110 classified as obligately homofermentative. Thus, comparative genomic analysis of glycolysis  
111 reveals that species inside the historically defined groups have a coherent genotypic  
background despite metabolic heterogeneity.

## 112 **Supplementary Note 5**

### 113 **Carbohydrate active enzymes**

114 Some GH families are present more uniformly across the dataset, indicating the  
115 importance of the biotransformations associated with these families. Included in this are  
116 enzymes involved in the hydrolysis of peptidoglycan (GH25 and GH73<sup>8</sup>), which play an  
117 important role in cell division, growth and preserving cell wall integrity. Bacterial autolysis can  
118 have a positive impact in the dairy fermentation process through the enhancement of cheese  
119 flavour upon the release of enzymes and amino acids<sup>9</sup>. Starch degradation enzymes are also  
120 present almost uniformly across the genome set.  $\alpha$ -amylase enzymes are catalysts in the  
121 hydrolysis of the  $\alpha$ -1,4 glycosidic linkages of starch with GH13 being the main GH family acting  
122 on substrates with  $\alpha$ -glucoside linkages.  $\alpha$ -glucan metabolism is important in the breakdown  
123 of resistant starch. Another universal family of GHs is GH65; this family is mainly composed  
124 of phosphorylases, including maltose and trehalase phosphorylase, which are essential for  
125 the survival of lactobacilli in sugar-rich environments such as sourdough, where maltose is the  
126 predominant sugar<sup>10</sup>.

127 Six clades display unusually high GH abundance, namely, *L. (par)alimentarius*, *L.*  
128 *perolens*, *L. plantarum*, *L. rafi*, *L. fructivorans* and *Carnobacterium* spp. The *Weissella* spp.  
129 and *L. fructivorans* clade show an unusually low GH gene count. The most abundant GH  
130 families are GH1, GH13, GH25 and GH73. GH73, an N-acetylmuramidase, is present in all  
131 *Lactobacillus* species except *L. equi*. The four *Carnobacterium* genomes harbor several GH  
132 families that are absent in all or most of the other genomes including GH18, GH24, GH84,  
133 GH85 and GH119. GH18 enzymes are chitinases, GH24 are lysozymes while GH119  
134 enzymes are involved in chitin binding.

135 Some rare GTs emerge in the dataset. *P. lolii* and *P. parvulus* are the only strains that  
136 harbour genes for GT12, a ganglioside synthase. This activity is very interesting as it has been  
137 reported in only 3 bacterial species and 28 eukaryotes. Production of GT11 may be a strain-  
138 specific trait, because a single non-type strain of each of *L. johnsonii*, *L. amylovorus* and *L.*  
139 *paraplantarum* also appear to encode this activity ([http://www.cazy.org/GT11\\_bacteria.html](http://www.cazy.org/GT11_bacteria.html)).

140 A number of GT families are present almost uniformly across the dataset. These  
141 include GT51, which is involved in peptidoglycan synthesis<sup>8</sup> and only *L. coleohominis* lacks

142 GT28, a galactosyltransferase involved in cell wall metabolism, suggesting alternative cell wall  
143 structure in this vaginal isolate. Other ubiquitous families include more broad-spectrum GTs  
144 that have been termed “polyspecific” because of their diverse functionality. Examples include  
145 GT4 and GT2, which encompass at least 12 functions including cellulose synthase, chitin  
146 synthase and mannosyltransferase<sup>11</sup>.

147 The abundance of genes encoding carbohydrate transporters correlates strongly with  
148 GH abundance and less strongly with GT abundance (Supplementary Fig. 21). The clade  
149 distribution of carbohydrate transporter gene counts (Supplementary Fig. 22) mirrors this  
150 correlation and highlights the relative abundance of carbohydrate management machinery in  
151 the *L. alimentarius*, *L. casei*, *L. mali*, *L. plantarum* and *L. collinoides* clades, the pediococci  
152 and carnobacteria. Normalization for genome size (Supplementary Fig. 23) reduces the  
153 apparent overabundance of GT genes in some species, but not GH genes (Supplementary  
154 Fig. 23), and it is debatable if such normalization is biologically relevant.

## 155 **Supplementary Note 6**

### 156 **Metabolic diversity of the lactobacilli**

157 A general representation of the genome content of the lactobacilli as Clusters of  
158 Orthologous Groups (COGs; Supplementary Fig 15) reveals unexpected diversity in  
159 categories including Transcription, Cell wall biogenesis, Energy production, Co-enzyme  
160 transport, and Inorganic ion transport. The *L. plantarum*-related species from *L.*  
161 *fabifermentans* through *L. paraplantum* (in Fig. 2) are particularly endowed with genes for  
162 carbohydrate and amino acid transport and metabolism. Members of the *L. salivarius* clade  
163 have the highest number of genes involved in cell motility and secretion, as expected from  
164 previous studies in our group<sup>12</sup>. Forty nine (23%) of the genomes screened had none of the  
165 complete pathways for production of the 20 standard amino acids (AA), while no single  
166 genome harboured the genes to produce all 20 AAs. The highest number of pathways  
167 encoded by any one species was sixteen in *L. similis* (Supplementary Table 9). Some  
168 phylogenetic clades harbored genes for the production of one or two amino acids; these  
169 include *Weissella*, *L. brevis*, *Pediococcus* and *L. sakei*. The clade containing *L. collinoides*  
170 and *L. kimchicus* as well as the *L. coryniformis* clade (with the exception of *L. rennini*) are  
171 predicted to be prototrophic for at least 14 AAs. In contrast, ten of the twelve dairy isolates  
172 have genes for five or fewer complete AA pathways, reflecting their evolution to the AA-rich  
173 dairy environment.

## 174

## 175 **Supplementary Note 7**

### 176 **Sortase-anchored proteins**

177 The distribution of LPXTG proteins was not clearly correlated with the evolutionary  
178 relationship of lactobacilli. Rather, it seems that the decoration of the cell wall with anchored

179 proteins is a common feature, indicating that most lactobacilli can establish interactions with  
180 the environment. In our dataset of 213 genomes, only twelve bacterial strains do not have  
181 LPXTG proteins (Supplementary Table 5). In addition, most lactobacilli genomes harbor at  
182 least one gene encoding sortase, presumably the housekeeping sortase. The copy number of  
183 sortase genes could be associated to some extent with the presence of pilus gene clusters  
184 (PGC) (Fig. 4). These PGCs were identified in 51 strains in total, mostly belonging to six  
185 clades. The bacterial species with the most pilus gene clusters was *Lactobacillus sharpeae*, a  
186 sewage isolate. We also observed a large diversity of PGCs in terms of gene organization and  
187 numbers, suggesting they may have distinct gene order and functions (Supplementary Fig.  
188 10). One of the most common PGC types consists of three pilin genes and one sortase gene,  
189 which is similar to the PGC originally reported in *L. rhamnosus* GG<sup>13</sup>.

## 190 **Supplementary Note 8**

### 191 **The *Lactobacillus mobilome***

192 The mobile component of the bacterial genome can expand coding capacity as in the  
193 case of plasmids and megaplasmids<sup>14</sup> or may be associated with genome decay as in the  
194 case of Insertion Sequence (IS) elements<sup>15</sup>. Some IS elements exhibit a very limited  
195 distribution across the 213 genomes, for example, IS1 which is restricted to only *L. ingluvei*  
196 and *L. equi* (Supplementary Fig. 16). IS91 is present in the genomes of only two species, both  
197 of dairy-product origin (*L. casei* and *L. paracasei* subsp. *tolerans*), and IS481 is found in only  
198 3 strains (*L. paracollinoides*, *L. farraginis* and *P. inopinatus*) all associated with brewing. IS3,  
199 on the other hand, exhibits a much greater distribution being present in almost all groups, with  
200 the exception of *Weissella/Leuconostoc*, *L. fructivorans*, some *L. delbrueckii* strains and a few  
201 singletons. Some genomes apparently harbor no IS elements, perhaps indicating a more rigid  
202 architecture and a selective pressure against the acquisition of such elements. These species  
203 include *Atopobium minutum*, *L. fructivorans*, *L. florum*, *L. sensoris*, *Weissella viridescens*, *L.*  
204 *cacaonum*, *L. apodemi*, *L. ceti* and *L. brantae*. Of the 18 IS families in this database, the largest  
205 number of families found is 13, in the *L. parabuchneri* genome. It is clear that IS elements  
206 have played a general role in shaping the diversification and evolution of the lactobacilli.

207 Phages were detected in the genomes of 195 of the 213 genomes (Supplementary  
208 Fig. 13), and only the genomes of *L. floricola*, *L. ingluviei*, *L. psittaci*, *L. sakei* subsp. *sakei*, *L.*  
209 *sanfranciscensis*, *P. cellicola*, *P. claussenii* and *W. halotolerans* lacked homologues of phage  
210 proteins. Proteins corresponding to holins and endolysins, and fibers/fiber assembly proteins  
211 were apparently under-represented; this is likely due to the fact that holins are not well  
212 annotated, whereas fiber proteins are very divergent, and not always present in the phage. It  
213 is likely that this analysis under-reports phage genes and that fine tuning of homology cut-offs  
214 for individual genes will identify more temperate phage. We identified plasmids in 41% of the

215 213 genomes analysed (Supplementary. Fig. 14) with numbers ranging from zero to six. 58%  
216 of the plasmid-related genes were of unknown function, emphasizing the need for functional  
217 genomics to elucidate this gene repertoire. Given the desirability of finding new plasmid  
218 vectors for genetically manipulating lactobacilli in the laboratory and for food-grade strain  
219 construction, these genomic data represent a valuable resource. Of the 87 strains predicted  
220 to have plasmids, 75 had identifiable replication genes. The other 12 may harbor new  
221 replication types that would be compatible with existing plasmid vectors.

## 222 **Supplementary Note 9**

### 223 **Stress resistance**

224 The broad range of niches that lactobacilli occupy is reflected in the multiple stress  
225 resistance mechanisms their genomes encode (Supplementary Fig. 24). Knowledge of the  
226 differential abundance of these systems can be exploited for identifying species and strains  
227 that can withstand production stress, storage stress or intestinal survival<sup>16</sup>. Superoxide  
228 dismutase and catalase show very limited distribution, as does the gene encoding glutamate  
229 decarboxylase involved in proton scavenging and acid resistance (Supplementary Fig. 24),  
230 the last of which is concentrated in *L. helveticus* and related species. Urease genes were  
231 present in only 8 species including 3 of the 4 *Carnobacteria* species. Bile salt hydrolases  
232 contribute to bile resistance in lactobacilli<sup>17</sup>; the pattern of their distribution in this genome data  
233 resource, viewed in conjunction with other stress resistance genes, allows rational  
234 identification of species likely to survive intestinal transit.

235 Protein acetyltransferases of prokaryotes like *Escherichia coli* confer resistance to heat  
236 and oxidative stress<sup>18</sup>, and it was recently reported that homologs of the eukaryotic sirtuin  
237 protein acetyltransferases contribute to stress resistance in *Lactobacillus paracasei*<sup>19</sup>. Forty of  
238 the 213 genomes analyzed here lack homologs of any of SIRT1, SIR2L1, or Sir2 $\alpha$   
239 (Supplementary Table 10). The remaining 173 genomes encode at least one homolog, with a  
240 single species *L. ultunensis* harbouring 4 homologs, and 3 homologs being found in a large  
241 number of food or intestinal lactobacilli. Since pre-treatment of *Lactobacillus paracasei* strains  
242 with the sirtuin activator resveratrol (found in berries and red wine) alleviated growth inhibition  
243 by cholate<sup>19</sup>, this presents the exciting prospect that some food ingredients might promote  
244 shelf-life of lactobacilli in functional food products, or that certain prebiotics might rationally  
245 promote survival and intestinal transit of lactobacilli administered in synbiotics.

## 246 **Supplementary Note 10**

### 247 **Niche association and genome content**

248 A search for associations between niche and genome content for the 213 genomes  
249 revealed moderate trends. The strongest trends were detected for species isolated from  
250 animal sources (n=56), which, as noted in the main text, also had the lowest number of

251 predicted genes and the smallest average genome size (Supplementary Fig. 25). This is  
252 evident at a functional level where numerous functional gene groups displayed the lowest  
253 abundances in the animal niche. These groups include genes for the transport and metabolism  
254 of carbohydrates (Supplementary Fig. 25, top panel), amino acids, lipids (Supplementary Fig.  
255 25, top panel), co-enzymes, nucleotides and inorganic acids. Normalization for genome size  
256 brought the difference above the significance threshold (Supplementary Fig. 25, bottom  
257 panels; p-values of 0.11 and 0.107 for carbohydrate transport and lipid metabolism,  
258 respectively). Genes involved in transcription, cell wall/membrane biogenesis and secondary  
259 metabolites also have the lowest average abundance in the animal niche. Gene decay is  
260 commonly associated with host-adapted microbes and this is a possible explanation for the  
261 trend observed in genomes that have been isolated from animal sources.

262         Across the broader range of niches/sources, the analyses failed to detect niche-  
263 specific genomic associations in our study, but rather a general pattern of gene decay in  
264 species from the animal niche. This study focuses largely on the comparison of type strains  
265 within the genus *Lactobacillus* and associated species so it is likely that the diversity among  
266 species in the dataset was too great to reveal niche-specific traits. Studies that focus on  
267 multiple strains of the same species are more suited to discovering niche-specific genes.

268

## 269 **Supplementary Note 11**

### 270 **Targeting competing microbes**

271 Bacteriocins are small, ribosomally synthesized antimicrobial peptides that can be exploited  
272 as antimicrobial-producing cultures in fermented foods, or the bacteriocins themselves added,  
273 e.g. pediocin and carnobacteriocin used as biopreservatives<sup>20</sup>. Bacteriocins may also  
274 contribute to probiotic properties by limiting infection<sup>21</sup> or signalling to the innate immune  
275 system<sup>22</sup>. Of the 213 genomes analysed here, 107 (50.2%; Supplementary Table 11) harbored  
276 at least one Area of Interest (AOI) relating to bacteriocin production by screening against the  
277 BAGEL database<sup>23</sup>. Over half of these were larger proteins (>10 kDa) of the  
278 enterolysin/helveticin class, which are no longer considered classical bacteriocins<sup>24</sup>. However,  
279 their widespread distribution suggests a central function for these currently cryptic  
280 antimicrobials. Manual inspection confirmed that 38 AOIs had the contiguous gene structure  
281 expected for typical bacteriocin operons. No dominant bacteriocin type was identified,  
282 although 58% of intact AOIs fell under the Unmodified Bacteriocin (Class II) category. Many  
283 of these included homologs of well-known bacteriocin operons including plantaricin, sakacin,  
284 salivaricin, subtilin, leucocin, carnobacteriocin and lacticin F. Surprisingly, AOIs were  
285 identified in many species not previously associated with bacteriocin production. For example,  
286 genes encoding pediocins were annotated in *L. kimchicus* and *L. taiwanensis* was found to  
287 harbour the machinery to produce subtilin. Predicted bacteriocin loci were found across all

288 clades of the phylogenetic tree with the exception of *Weissella* and the *L. brevis/L.parabrevis*  
289 clade. Overall, the data do not support strict associations between species niche, the presence  
290 of a bacteriocin or type of bacteriocin. Moreover, the overall prevalence of bacteriocins was  
291 unexpectedly low compared to the literature describing this area, suggesting that many more  
292 *Lactobacillus* species can produce bacteriocins than those represented by their type strains  
293 examined in this study (for example *L. salivarius*<sup>25</sup>).

287 **Supplementary References**

288

289 1 Makarova, K. *et al.* Comparative genomics of the lactic acid bacteria. *Proc. Natl. Acad. Sci. U S*  
290 *A* **103**, 15611-15616, (2006).

291 2 Chan, J. Z., Halachev, M. R., Loman, N. J., Constantinidou, C. & Pallen, M. J. Defining bacterial  
292 species in the genomic era: insights from the genus *Acinetobacter*. *BMC Microbiol* **12**, 302,  
293 (2012).

294 3 Judicial Commission of the International Committee on Systematics of Bacteria. The type  
295 strain of *Lactobacillus casei* is ATCC 393, ATCC 334 cannot serve as the type because it  
296 represents a different taxon, the name *Lactobacillus paracasei* and its subspecies names are  
297 not rejected and the revival of the name '*Lactobacillus zeae*' contravenes Rules 51b (1) and (2)  
298 of the International Code of Nomenclature of Bacteria. Opinion 82. *Int J Syst Evol Microbiol*  
299 **58**, 1764-1765, (2008).

300 4 Goris, J. *et al.* DNA-DNA hybridization values and their relationship to whole-genome  
301 sequence similarities. *Int. J. Syst. Evol. Microbiol.* **57**, 81-91, (2007).

302 5 Dicks, L. M., Du Plessis, E. M., Dellaglio, F. & Lauer, E. Reclassification of *Lactobacillus casei*  
303 subsp. *casei* ATCC 393 and *Lactobacillus rhamnosus* ATCC 15820 as *Lactobacillus zeae* nom.  
304 rev., designation of ATCC 334 as the neotype of *L. casei* subsp. *casei*, and rejection of the name  
305 *Lactobacillus paracasei*. *Int J Syst Bacteriol* **46**, 337-340, (1996).

306 6 Salvetti, E., Torriani, S. & Felis, G. E. The genus *Lactobacillus*: a taxonomic update. *Probiotics*  
307 *Antimic. Proteins* **4**, 217-226, (2012).

308 7 Grossiord, B., Vaughan, E. E., Luesink, E. & de Vos, W. M. Genetics of galactose utilisation via  
309 the Leloir pathway in lactic acid bacteria. *Lait* **78**, 77-84, (1998).

310 8 Cayrou, C., Henrissat, B., Gouret, P., Pontarotti, P. & Drancourt, M. Peptidoglycan: a post-  
311 genomic analysis. *BMC Microbiol.* **12**, 294, (2012).

312 9 Huard, C. *et al.* Characterization of AcMB, an N-acetylglucosaminidase autolysin from  
313 *Lactococcus lactis*. *Microbiology* **149**, 695-705, (2003).

314 10 Ehrmann, M. A. & Vogel, R. F. Maltose metabolism of *Lactobacillus sanfranciscensis*: cloning  
315 and heterologous expression of the key enzymes, maltose phosphorylase and  
316 phosphoglucomutase. *FEMS Microbiol. Lett.* **169**, 81-86, (1998).

317 11 Breton, C., Snajdrova, L., Jeanneau, C., Koca, J. & Imberty, A. Structures and mechanisms of  
318 glycosyltransferases. *Glycobiology* **16**, 29R-37R, (2006).

319 12 Neville, B. A. *et al.* Characterization of Pro-Inflammatory Flagellin Proteins Produced by  
320 *Lactobacillus ruminis* and Related Motile *Lactobacilli*. *PLoS One* **7**, e40592, (2012).

321 13 Kankainen, M. *et al.* Comparative genomic analysis of *Lactobacillus rhamnosus* GG reveals pili  
322 containing a human- mucus binding protein. *Proc Natl Acad Sci U S A* **106**, 17193-17198,  
323 (2009).

324 14 Li, Y. *et al.* Distribution of megaplasmids in *Lactobacillus salivarius* and other lactobacilli. *J.*  
325 *Bacteriol.* **189**, 6128-6139, (2007).

326 15 Callanan, M. *et al.* Genome sequence of *Lactobacillus helveticus*, an organism distinguished  
327 by selective gene loss and insertion sequence element expansion. *J. Bacteriol.* **190**, 727-735,  
328 (2008).

329 16 Zhang, Y. & Li, Y. Engineering the antioxidative properties of lactic acid bacteria for improving  
330 its robustness. *Curr. Opin. Biotechnol.* **24**, 142-147, (2013).

331 17 Fang, F. *et al.* Allelic variation of bile salt hydrolase genes in *Lactobacillus salivarius* does not  
332 determine bile resistance levels. *J. Bact.* **191**, 5743-5757, (2009).

333 18 Ma, Q. & Wood, T. K. Protein acetylation in prokaryotes increases stress resistance. *Biochem.*  
334 *Biophys. Res. Commun.* **410**, 846-851, (2011).

335 19 Atarashi, H. *et al.* in *LAB11 2014, poster B014*. (Egmon aan Zee, Netherlands, 2014).



- 336 20 Cotter, P. D., Hill, C. & Ross, R. P. Bacteriocins: developing innate immunity for food. *Nat. Rev.*  
337 *Microbiol.* **3**, 777-788, (2005).
- 338 21 Corr, S. C. *et al.* Bacteriocin production as a mechanism for the antiinfective activity of  
339 *Lactobacillus salivarius* UCC118. *Proc. Natl. Acad. Sci. U S A* **104**, 7617-7621, (2007).
- 340 22 Meijerink, M. *et al.* Identification of genetic loci in *Lactobacillus plantarum* that modulate the  
341 immune response of dendritic cells using comparative genome hybridization. *PLoS One* **5**,  
342 e10632, (2010).
- 343 23 de Jong, A., van Heel, A. J., Kok, J. & Kuipers, O. P. BAGEL2: mining for bacteriocins in genomic  
344 data. *Nucleic Acids Res.* **38**, W647-651, (2010).
- 345 24 Arnison, P. G. *et al.* Ribosomally synthesized and post-translationally modified peptide natural  
346 products: overview and recommendations for a universal nomenclature. *Nat Prod Rep* **30**,  
347 108-160, (2013).
- 348 25 O'Shea, E. F. *et al.* Production of multiple bacteriocins from a single locus by gastrointestinal  
349 strains of *Lactobacillus salivarius*. *J. Bacteriol.* **193**, 6973-6982, (2011).

350

351
